# Supplementary material for: Lewis base catalyzed asymmetric substitution/Diels–Alder cascade reaction: a rapid and efficient construction of enantioenriched diverse tricyclic heterocycles
Source: Royal Society of Chemistry journal article supplement (doi:10.1039/c3ob41454j), 2013-01-01
Supplement: c3ob41454j.pdf [file c3ob41454j.pdf]

## Supporting Information

### Table of Contents

#### I. General Information

#### II. Preparation of Substrates

#### III. Reaction Condition Screening

#### IV. General Procedure and Experimental Details of the Formation of Azapolyheterocycle Compounds

#### V. Crystal Data and Structure Refinement for Polyheterocycle Compound

#### VI. HPLC and NMR Spectra

### I. General Information

All reactions were carried out under inert atmospheric condition unless otherwise noted, and solvents were dried according to established procedures. Reactions were monitored by thin layer chromatography (TLC) visualizing with ultraviolet light (UV),  $\text{KMnO}_4$ , *p*-anisaldehyde stain, and phosphomolybdic acid (PMA) stain; column chromatography purifications were carried out using silica gel. Proton nuclear magnetic resonance ( $^1\text{H}$  NMR) spectra were recorded on a 300 or 500 MHz spectrometer in  $\text{CDCl}_3$ , and carbon nuclear magnetic resonance ( $^{13}\text{C}$  NMR) spectra were recorded on 75 or 125 MHz spectrometer in  $\text{CDCl}_3$  unless otherwise noted. Chemical shifts for protons are reported in parts per million downfield from tetramethylsilane (TMS) and are referenced to residual protium in the NMR solvent ( $\text{CHCl}_3 = \delta$  7.26 ppm). Chemical shifts for carbon are reported in parts per million downfield from tetramethylsilane (TMS) and are referenced to the carbon resonances of the solvent residual peak ( $\text{CDCl}_3 = \delta$  77.16 ppm). NMR data are presented as follows: chemical shift ( $\delta$  ppm), multiplicity (s = singlet, d = doublet, t = triplet, q = quartet, m = multiplet, br = broad), coupling constant in Hertz (Hz), integration. Infrared (IR) spectra were recorded on a spectrometer. Mass spectra were recorded on the Bruker MicrOTOF Q II. Melting points were measured on a melting point apparatus and were uncorrected. The enantiomeric excesses of products were determined by chiral phase HPLC analysis at 30°C.

### II Preparation of Substrates

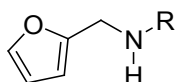

Furfurylamines were prepared according to a published procedure,<sup>1, 2</sup> the spectral data were in agreement with literature values.

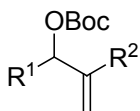

MBH carbonates were prepared according to a published procedure,<sup>3, 4</sup> the spectral data were in agreement with literature values.

### III. Reaction Condition Screening

#### Representative procedure for the synthesis of compounds 4 (Procedure A)

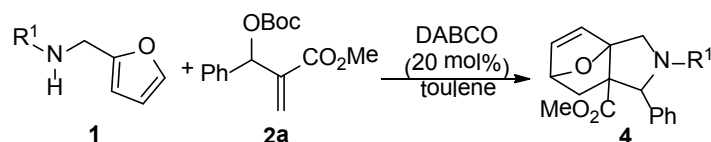

A mixture of sulfonamide **1** (0.1 mmol), MBH carbonate **2a** (0.13 mmol), and catalyst (0.02 mmol or 0.01 mmol), was dissolved in toluene (1.0 mL). Reaction mixture was stirred at room temperature and the reaction was monitored by TLC. Upon completion, the solvent was removed under reduced pressure. The crude product was purified by flash chromatography (silica gel, EtOAc/petroleum ether) to provide the desired product **4**. The major diastereoisomers were characterized, unless otherwise noted.

Table 1. Protecting group R<sup>1</sup> screening.<sup>a</sup>

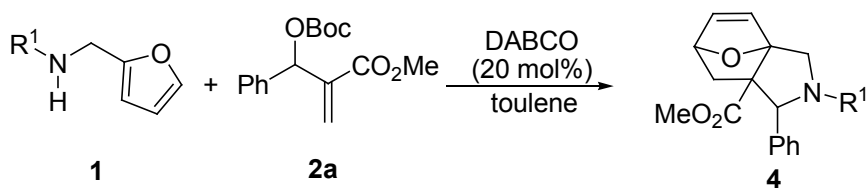

| Entry | R <sup>1</sup>     | <b>1</b>  | d.r. <sup>b</sup> | Yield (%) <sup>c</sup> |
|-------|--------------------|-----------|-------------------|------------------------|
| 1     | PhCO               | <b>1a</b> | 1:1.1             | 80 ( <b>4aa</b> )      |
| 2     | Ms                 | <b>1b</b> | >20/1             | 89 ( <b>4ba</b> )      |
| 3     | Tf                 | <b>1c</b> | >20/1             | 94 ( <b>4ca</b> )      |
| 4     | Ts                 | <b>1d</b> | >20/1             | 92 ( <b>4da</b> )      |
| 5     | 4-Ns               | <b>1f</b> | >20/1             | 93 ( <b>4fa</b> )      |
| 6     | 2-Ns               | <b>1g</b> | >20/1             | 95 ( <b>4ga</b> )      |
| 7     | CF <sub>3</sub> CO | <b>1j</b> | 4/1               | 92 ( <b>4ja</b> )      |
| 8     | Boc                | <b>1e</b> | -                 | < 1                    |
| 9     | CBz                | <b>1k</b> | 1.5/1             | 56 ( <b>4ka</b> )      |

<sup>a</sup> Unless otherwise noted, reactions were performed with **1** (0.1 mmol), **2** (0.13 mmol) and DABCO (20 mol %) in solvent (1 mL) at 30 °C. <sup>b</sup> Determined by NMR analysis. <sup>c</sup> Isolated yields.

Table 2. Screening of Catalysts for Asymmetric Cascade Reaction of Compound **1a**.<sup>a</sup>

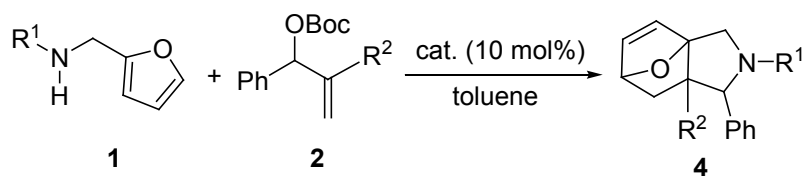

**2a**: R<sup>2</sup> = CO<sub>2</sub>Me; **2b**: R<sup>2</sup> = CO<sub>2</sub>Et; **2c**: R<sup>2</sup> = CO<sub>2</sub>But; **2d**: R<sup>2</sup> = CN;

| Entry          | Cat.                     | R <sup>1</sup> | <b>2</b>  | Yield (%) <sup>b</sup> | d.r. <sup>c</sup> | ee [%] <sup>d</sup> |
|----------------|--------------------------|----------------|-----------|------------------------|-------------------|---------------------|
| 1              | quinidine                | Ts             | <b>2a</b> | 84 ( <b>4da</b> )      | >20/1             | 67                  |
| 2              | quinidine                | Ts             | <b>2b</b> | 78 ( <b>4db</b> )      | >20/1             | 62                  |
| 3              | quinidine                | Ts             | <b>2c</b> | 25 ( <b>4dc</b> )      | >20/1             | 62                  |
| 4 <sup>e</sup> | quinidine                | Ts             | <b>2d</b> | 97 ( <b>4dd</b> )      | 1.1/1             | 33(51)              |
| 5              | hydroquinidine           | Ts             | <b>2a</b> | 75 ( <b>4da</b> )      | >20/1             | 76                  |
| 6              | quinine                  | Ts             | <b>2a</b> | 80 ( <b>4da</b> )      | >20/1             | -30                 |
| 7              | cinchonine               | Ts             | <b>2a</b> | 10 ( <b>4da</b> )      | >20/1             | 52                  |
| 8              | cinchonidine             | Ts             | <b>2a</b> | 68 ( <b>4da</b> )      | >20/1             | 20                  |
| 9              | (DHQD) <sub>2</sub> PHAL | Ts             | <b>2a</b> | 38 ( <b>4da</b> )      | >20/1             | -50                 |
| 10             | (DHQD) <sub>2</sub> PHAL | Ts             | <b>2a</b> | 43 ( <b>4da</b> )      | 18/1              | 58                  |
| 11             | (DHQD) <sub>2</sub> PYR  | Ts             | <b>2a</b> | 54 ( <b>4da</b> )      | >20/1             | -49                 |
| 12             | (DHQD) <sub>2</sub> PYR  | Ts             | <b>2a</b> | 31 ( <b>4da</b> )      | >20/1             | 72                  |
| 13             | (DHQD) <sub>2</sub> AQN  | Ts             | <b>2a</b> | 54 ( <b>4da</b> )      | 19/1              | -39                 |
| 14             | (DHQD) <sub>2</sub> AQN  | Ts             | <b>2a</b> | 46 ( <b>4da</b> )      | >20/1             | 89                  |
| 15             | (DHQD) <sub>2</sub> AQN  | Ms             | <b>2a</b> | 65 ( <b>4ba</b> )      | 15/1              | 79                  |
| 16             | (DHQD) <sub>2</sub> AQN  | Tf             | <b>2a</b> | <1 ( <b>4ca</b> )      | -                 | -                   |
| 17             | (DHQD) <sub>2</sub> AQN  | 4-Ns           | <b>2a</b> | 70 ( <b>4fa</b> )      | 15/1              | 87                  |
| 18             | (DHQD) <sub>2</sub> AQN  | 2-Ns           | <b>2a</b> | 70 ( <b>4ga</b> )      | 9/1               | 85                  |

<sup>a</sup> Unless otherwise noted, reactions were performed with **1** (0.1 mmol), **2** (0.13 mmol), and catalyst (10 mol %) in toluene (0.5 mL, c = 0.2 M) at 25 °C for 24 hours. <sup>b</sup> Isolated yields. <sup>c</sup> Determined by <sup>1</sup>HNMR analysis. <sup>d</sup> Determined by chiral HPLC analysis. <sup>e</sup> The d.r. value was calculated by isolated yields.

Table 3. Solvents screening.<sup>a</sup>

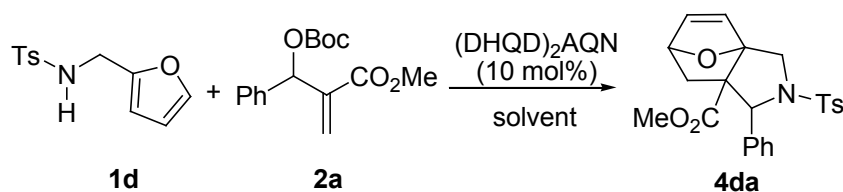

| Entry | Solvent           | Yield (%) <sup>b</sup> | d.r. <sup>c</sup> | ee(%) <sup>c</sup> |
|-------|-------------------|------------------------|-------------------|--------------------|
| 1     | toluene           | 46                     | 24/1              | 89                 |
| 2     | xylene            | 52                     | 18/1              | 90                 |
| 3     | CHCl <sub>3</sub> | 87                     | 24/1              | 68                 |
| 4     | DCE               | 86                     | 19/1              | 71                 |
| 5     | PhCF <sub>3</sub> | 84                     | 21/1              | 83                 |
| 6     | benzene           | 72                     | 18/1              | 82                 |
| 7     | 1,4-dioxane       | 54                     | 32/1              | 79                 |
| 8     | DCM               | 86                     | 16/1              | 70                 |
| 9     | THF               | 85                     | 17/1              | 66                 |
| 10    | <i>o</i> -xylene  | 50                     | 20/1              | 89                 |
| 11    | <i>m</i> -xylene  | 50                     | 20/1              | 91                 |
| 12    | <i>p</i> -xylene  | 57                     | 17/1              | 86                 |

<sup>a</sup> Unless otherwise noted, reactions were performed with **1d** (0.1 mmol), **2a** (0.13 mmol), and catalyst (10 mol %) in toluene (0.5 mL, c = 0.2 M) at 25°C for 48 hours. <sup>b</sup> Isolated yields. <sup>c</sup> Determined by chiral HPLC analysis.

Table 4. Additives screening. <sup>a</sup>

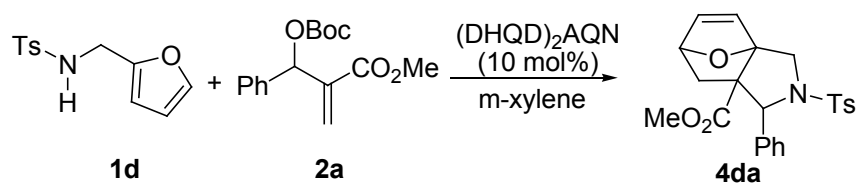

| Entry           | Additives            | T (°C) | t (d) | Yield (%) <sup>b</sup> | d.r. <sup>c</sup> | Ee[%] <sup>c</sup> |
|-----------------|----------------------|--------|-------|------------------------|-------------------|--------------------|
| 1               | no                   | 25     | 2     | 50                     | 20/1              | 91                 |
| 2               | FeCl <sub>2</sub>    | 25     | 2     | n.r.                   | -                 | -                  |
| 3               | FeCl <sub>3</sub>    | 25     | 2     | n.r.                   | -                 | -                  |
| 4               | CuSO <sub>4</sub>    | 25     | 2     | 49                     | 20/1              | 91                 |
| 5               | CuI                  | 25     | 2     | 43                     | 23/1              | 91                 |
| 6 <sup>d</sup>  | CuI /L               | 25     | 2     | 52                     | 23/1              | 87                 |
| 7 <sup>d</sup>  | CuCl <sub>2</sub> /L | 25     | 2     | 51                     | 23/1              | 90                 |
| 8               | (s)-(-)-BINOL        | 25     | 2     | 35                     | 23/1              | 91                 |
| 9               | 4ÅMS                 | 25     | 2     | 47                     | 27/1              | 91                 |
| 10              | 4ÅMS                 | 35     | 3     | 61                     | 22/1              | 91                 |
| 11              | 4ÅMS                 | 50     | 2     | 93                     | 7/1               | 89                 |
| 12 <sup>e</sup> | 4ÅMS                 | 25     | 2     | 73                     | 26/1              | 90                 |
| 13 <sup>e</sup> | 4ÅMS                 | 25     | 4     | 95                     | 29/1              | 90                 |

<sup>a</sup> Unless otherwise noted, reactions were performed with **1d** (0.1 mmol), **2a** (0.13 mmol), catalyst (10 mol %) and additives (10 mol%) in toluene (0.5 mL, c = 0.2 M) at 25°C for 48 hours. <sup>b</sup> Isolated yields. <sup>c</sup> Determined by chiral HPLC analysis. <sup>d</sup> Ligand (1,10-phenanthroline, 10 mol%) was added. <sup>e</sup> Reaction was carried out in solvent (c = 0.4 M)

#### IV. General Procedure and Experimental Details of the Formation of Azapolyheterocycle Compounds 4

##### Preparation of compound 4 by Procedure A:

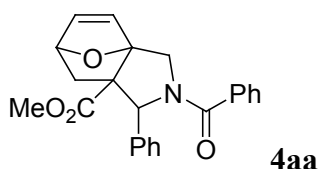

According to the general procedure in which DABCO (20 mol%) was used, colourless oil was obtained as inseparable mixture of **4aa** (*endo*-/*exo*-) in 80% yield (30 mg, dr = 1/1.1). Major isomer: <sup>1</sup>H NMR (300 MHz, CDCl<sub>3</sub>) δ 7.58–6.95 (m, 10H), 6.49 (dd, *J* = 5.7, 1.4 Hz, 1H), 6.41 (d, *J* = 5.7 Hz, 1H), 5.02 (s, 1H), 4.77 (dd, *J* = 4.5, 1.6 Hz, 1H), 4.70 (d, *J* = 14.0 Hz, 1H), 4.31 (d, *J* = 14.1 Hz, 1H), 3.74 (s, 3H), 1.85–1.71 (m, 1H), 1.64–1.59 (m, 1H). Minor isomer: <sup>1</sup>H NMR (300 MHz, CDCl<sub>3</sub>) δ 7.58–6.95 (m, 10H), 6.45 (dd, *J* = 5.7, 1.5 Hz, 1H), 6.30 (d, *J* = 5.7 Hz, 1H), 5.74 (s, 1H), 4.77 (dd, *J* = 4.5, 1.6 Hz, 1H), 4.22 (s, 2H), 3.74 (s, 3H), 1.85–1.71 (m, 2H). <sup>13</sup>C NMR (125 MHz, CDCl<sub>3</sub>) δ 173.76, 173.37, 171.92, 140.39, 139.72, 139.64, 139.59, 137.10, 136.92, 134.49, 134.07, 131.29, 129.94, 129.29, 128.56, 128.47, 128.37, 128.24, 127.95, 127.88, 127.44, 127.34, 126.85, 126.12, 97.61, 97.35, 80.52, 80.18, 69.33, 66.63, 64.80, 63.27, 52.72, 51.90, 51.62, 49.02, 33.60, 33.55. HRMS (ESI): calcd. for C<sub>23</sub>H<sub>22</sub>NO<sub>4</sub> ([M+H]<sup>+</sup>): 376.1543, found 376.1544.

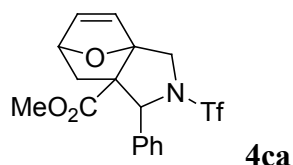

According to the general procedure in which DABCO (20 mol%) was used, white solid was obtained in 94% yield (38 mg), mp: 101.4-103.8°C.  $^1\text{H}$  NMR (300 MHz,  $\text{CDCl}_3$ )  $\delta$  7.38-7.25 (m, 5H), 6.53 (dd,  $J = 5.7, 1.6$  Hz, 1H), 6.37 (d,  $J = 5.7$  Hz, 1H), 5.36 (s, 1H), 4.82 (dd,  $J = 4.7, 1.7$  Hz, 1H), 4.53 (d,  $J = 11.2$  Hz, 1H), 4.25 (d,  $J = 11.3$  Hz, 1H), 3.79 (s, 3H), 1.84 (d,  $J = 12.4$  Hz, 1H), 1.62 (dd,  $J = 12.5, 4.8$  Hz, 1H).  $^{13}\text{C}$  NMR (125 MHz,  $\text{CDCl}_3$ )  $\delta$  172.78, 140.57, 133.56, 128.36, 80.63, 70.62, 53.07, 51.55, 34.26.  $^{19}\text{F}$  NMR (471 MHz,  $\text{CDCl}_3$ )  $\delta$  -77.43 (s). HRMS (ESI): calcd. for  $\text{C}_{17}\text{H}_{17}\text{F}_3\text{NO}_5\text{S}$  ( $[\text{M}+\text{H}]^+$ ): 404.0774, found 404.0775.

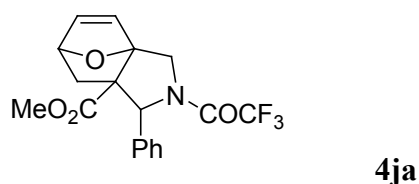

According to the general procedure in which DABCO (20 mol%) was used, colorless oil was obtained as inseparate mixture of **4ja** (*endo*-/*exo*-) obtained in 92% yield (33.8 mg, dr =4/1). Major isomer:  $^1\text{H}$  NMR (300 MHz,  $\text{CDCl}_3$ )  $\delta$  7.35 – 7.25 (m, 3H), 7.17 – 7.11 (m, 2H), 6.51 (dd,  $J = 5.7, 1.7$  Hz, 1H), 6.40-6.34 (m, 1H), 5.50 (s, 1H), 4.80 (dd,  $J = 4.7, 1.7$  Hz, 1H), 4.58 (d,  $J = 12.2$  Hz, 1H), 4.44 (d,  $J = 12.2$  Hz, 1H), 3.73 (s, 3H), 1.83 (d,  $J = 12.3$  Hz, 1H), 1.75-1.67 (m, 1H). Minor isomer:  $\delta$  7.35 – 7.25 (m, 3H), 7.17 – 7.11 (m, 2H), 6.51 (dd,  $J = 5.7, 1.7$  Hz, 1H), 6.40-6.34 (m, 1H), 5.47 (s, 1H), 4.77 (dd,  $J = 4.5, 1.9$  Hz, 1H), 4.55 (d,  $J = 14.4$  Hz, 1H), 4.26 (d,  $J = 14.4$  Hz, 1H), 3.74 (s, 3H), 1.88 (d,  $J = 12.4$  Hz, 1H), 1.75-1.67 (m, 1H).  $^{13}\text{C}$  NMR (126 MHz,  $\text{CDCl}_3$ )  $\delta$  173.31, 140.34, 137.90, 134.33, 133.62, 128.61, 128.08, 128.05, 127.99, 127.80, 97.93, 80.84, 80.63, 68.78, 62.75, 53.09, 50.91, 49.31, 49.28, 49.24, 49.21, 33.86, 33.72.  $^{19}\text{F}$  NMR (471 MHz,  $\text{CDCl}_3$ )  $\delta$  -70.76, -72.70. HRMS (ESI): calcd. for  $\text{C}_{18}\text{H}_{17}\text{F}_3\text{NO}_4$  ( $[\text{M}+\text{H}]^+$ ): 368.1104, found 368.1105.

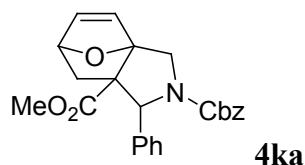

According to the general procedure in which DABCO (20 mol%) was used, colorless oil was obtained as inseparate mixture of **4ka** (*endo*-/*exo*-) in 56% yield (22.7 mg, dr =1.5/1). Major isomer:  $^1\text{H}$  NMR (300 MHz,  $\text{CDCl}_3$ )  $\delta$  7.38-7.25 (m, 5H), 7.22-7.10 (m, 4H), 6.71 (d,  $J = 7.1$  Hz, 1H), 6.48-6.44 (m, 1H), 6.40-6.36 (m, 1H), 5.21 (s, 1H), 5.12-5.05 (m, 1H), 4.90 (d,  $J = 12.6$  Hz, 1H), 4.78-4.75 (m, 1H), 4.36-4.30 (m, 1H), 4.23-4.15 (m, 1H), 3.70 (s, 3H), 1.81-1.75 (m, 1H), 1.67-1.61 (m, 1H). Minor isomer:  $^1\text{H}$  NMR (300 MHz,  $\text{CDCl}_3$ )  $\delta$  7.38-7.25 (m, 5H), 7.22-7.10 (m, 4H), 6.71 (d,  $J = 7.1$  Hz, 1H), 6.48-6.44 (m, 1H), 6.40-6.36 (m, 1H), 5.29 (s, 1H), 5.12-5.05 (m, 2H), 4.78-4.75 (m, 1H), 4.36-4.30 (m, 1H), 4.23-4.15 (m, 1H), 3.70 (s, 3H), 1.81-1.75 (m, 1H), 1.67-1.61 (m, 1H).  $^{13}\text{C}$  NMR (125 MHz,  $\text{CDCl}_3$ )  $\delta$  173.94, 173.90, 154.99, 154.98, 140.87, 139.98, 139.88, 139.81, 139.25, 136.93, 136.49, 136.16, 134.31, 133.64, 128.65, 128.36, 128.33, 128.29, 128.15,

128.08, 127.95, 127.62, 127.52, 127.40, 127.29, 127.06, 97.73, 96.96, 95.07, 80.29, 80.09, 71.47, 71.14, 67.70, 67.44, 67.29, 67.21, 66.99, 64.88, 63.89, 52.82, 52.79, 51.69, 50.48, 50.05, 49.44, 49.17, 37.95, 34.16, 33.94. HRMS (ESI): calcd. for  $C_{24}H_{24}NO_5$  ( $[M+H]^+$ ): 406.1649, found 406.1650.

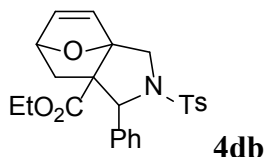

According to the general procedure, quinidine (10 mol%) was used. White solid (34.3 mg, 78 %), mp: 103.2-105.0°C, 62 % ee. The ee of the product was determined by HPLC using an AD-H column (n-Hexane / i-PrOH = 80/20, flow rate 0.5 ml/min,  $\lambda$  = 210 nm, major diastereomer:  $t_R$  = 25.7 min (minor) and  $t_R$  = 27.5 min (major), minor diastereomer:  $t_R$  = 33.5 min (major).  $[\alpha]_D^{25}$  = -33 (C = 1.06,  $CHCl_3$ ).  $^1H$  NMR (300 MHz,  $CDCl_3$ )  $\delta$  7.66 – 7.52 (m, 2H), 7.26-7.19 (m, 7H), 6.43 (dd,  $J$  = 5.7, 1.7 Hz, 1H), 6.28 (d,  $J$  = 5.7 Hz, 1H), 5.06 (s, 1H), 4.75 (dd,  $J$  = 4.7, 1.7 Hz, 1H), 4.17 (d,  $J$  = 10.7 Hz, 1H), 4.08 (d,  $J$  = 10.8 Hz, 1H), 4.09 – 3.98 (m, 1H), 3.73 (dq,  $J$  = 10.7, 7.1 Hz, 1H), 2.40 (s, 3H), 1.69 (d,  $J$  = 12.4 Hz, 1H), 1.51 (dd,  $J$  = 12.4, 4.8 Hz, 1H), 1.12 (t,  $J$  = 7.4 Hz, 3H).  $^{13}C$  NMR (126 MHz,  $CDCl_3$ )  $\delta$  172.72, 143.34, 139.85, 139.79, 135.18, 133.53, 129.36, 127.73, 127.49, 96.96, 79.94, 68.82, 65.12, 61.32, 50.21, 34.60, 21.50, 13.98. HRMS (ESI): calcd. for  $C_{24}H_{26}NO_5S$  ( $[M+H]^+$ ): 440.1526, found 440.1529.

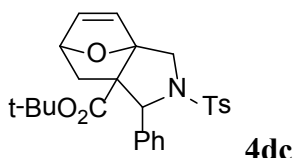

According to the general procedure, quinidine (10 mol%) was used. Colorless oil (11.7 mg, 25 %), 62 % ee. The ee of the product was determined by HPLC using an OD-H column (n-Hexane / i-PrOH = 80/20, flow rate 0.5 ml/min,  $\lambda$  = 210 nm, major diastereomer:  $t_R$  = 11.4 min (major) and  $t_R$  = 12.8 min (minor).  $[\alpha]_D^{21}$  = -12 (C = 0.49,  $CHCl_3$ ).  $^1H$  NMR (300 MHz,  $CDCl_3$ )  $\delta$  7.54 – 7.47 (m, 2H), 7.25 – 7.01 (m, 7H), 6.44 (dd,  $J$  = 5.7, 1.7 Hz, 1H), 6.37 (d,  $J$  = 5.7 Hz, 1H), 5.11 (s, 1H), 4.72 (dd,  $J$  = 4.7, 1.7 Hz, 1H), 4.28 (d,  $J$  = 10.6 Hz, 1H), 3.99 (d,  $J$  = 10.6 Hz, 1H), 2.37 (s, 3H), 1.65 (d,  $J$  = 12.4 Hz, 1H), 1.46 (dd,  $J$  = 12.4, 4.8 Hz, 1H), 1.41 (s, 9H).  $^{13}C$  NMR (126 MHz,  $CDCl_3$ )  $\delta$  172.01, 143.15, 139.52, 139.50, 136.05, 133.88, 129.29, 127.50, 127.37, 96.84, 82.11, 79.76, 68.95, 65.94, 50.36, 34.64, 27.79, 21.44.

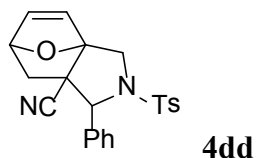

According to the general procedure, quinidine (10 mol%) was used. The diastereoisomers can be separated by column. White solid **4dd** (minor isomer A: 18.1 mg, 46 %), mp: 117.0-119.3°C, 51 % ee. The ee of the product was determined by HPLC using an OD-H column (n-Hexane / i-PrOH = 80/20, flow rate 0.5 ml/min,  $\lambda$  = 210 nm, major diastereomer:  $t_R$  = 35.5 min (major) and  $t_R$  = 40.5

min (minor)).  $[\alpha]_D^{21} = +9$  ( $C = 0.52$ ,  $\text{CHCl}_3$ ). Isomer A:  $^1\text{H NMR}$  (300 MHz,  $\text{CDCl}_3$ )  $\delta$  7.67 (d,  $J = 8.3$  Hz, 2H), 7.32-7.24 (m, 7H), 6.59 (dd,  $J = 5.7, 1.6$  Hz, 1H), 6.51 (d,  $J = 5.7$  Hz, 1H), 5.32 (s, 1H), 4.88 (dd,  $J = 4.5, 1.6$  Hz, 1H), 4.22 (d,  $J = 11.7$  Hz, 1H), 4.04 (d,  $J = 11.8$  Hz, 1H), 2.43 (s, 3H), 1.76 (dd,  $J = 12.4, 4.6$  Hz, 1H), 1.52 (d,  $J = 12.4$  Hz, 1H).  $^{13}\text{C NMR}$  (126 MHz,  $\text{CDCl}_3$ )  $\delta$  144.20, 140.47, 137.80, 133.99, 133.84, 129.81, 128.46, 128.35, 128.21, 127.67, 121.91, 98.11, 80.85, 69.49, 51.21, 48.80, 37.63, 21.61. HRMS (ESI): calcd. for  $\text{C}_{22}\text{H}_{21}\text{N}_2\text{O}_3\text{S}$  ( $[\text{M}+\text{H}]^+$ ): 393.1267, found 393.1267.

Major isomer B: white solid (20.0 mg, 51 %), mp: 111.3-113.1 °C, 33 % ee. The ee of the product was determined by HPLC using an OD-H column (n-Hexane / i-PrOH = 80/20, flow rate 0.5 ml/min,  $\lambda = 210$  nm, major diastereomer:  $t_R = 24.0$  min (minor) and  $t_R = 30.6$  min (major).  $[\alpha]_D^{25} = +79$  ( $C = 0.88$ ,  $\text{CHCl}_3$ ).  $^1\text{H NMR}$  (300 MHz,  $\text{CDCl}_3$ )  $\delta$  7.54 – 7.49 (m, 2H), 7.43-7.42 (m, 2H), 7.36-7.33 (m, 3H), 7.27 – 7.22 (m, 2H), 6.61 (dd,  $J = 5.8, 1.7$  Hz, 1H), 6.55 (d,  $J = 5.8$  Hz, 1H), 5.09 (dd,  $J = 4.4, 1.7$  Hz, 1H), 4.37 (d,  $J = 13.2$  Hz, 1H), 4.27 (s, 1H), 4.19 (d,  $J = 13.3$  Hz, 1H), 2.41 (s, 1H), 2.34 (dd,  $J = 12.2, 4.5$  Hz, 1H), 1.64 (d,  $J = 12.3$  Hz, 1H).  $^{13}\text{C NMR}$  (125 MHz,  $\text{CDCl}_3$ )  $\delta$  144.30, 140.57, 137.91, 134.09, 133.95, 129.92, 128.57, 128.46, 128.32, 127.77, 122.02, 98.22, 80.96, 69.60, 51.32, 48.91, 37.73, 21.71. HRMS (ESI): calcd. for  $\text{C}_{22}\text{H}_{21}\text{N}_2\text{O}_3\text{S}$  ( $[\text{M}+\text{H}]^+$ ): 393.1267, found 393.1266.

#### Preparation of compound 4 by Procedure B:

A mixture of sulfonamide **1** (0.1 mmol), MBH carbonate **2** (0.13 mmol), 4 Å molecular sieves (20 mg) and  $(\text{DHQD})_2\text{AQN}$  (0.01 mmol), was dissolved in *m*-xylene (0.25 mL). Reaction mixture was stirred at 25 °C for 96 hrs. Upon completion, the mixture was filtrated through a pad of Celite and the precipitate washed with dichloromethane. The organic phase was evaporated and the residue was purified by flash chromatography (silica gel, EtOAc/petroleum ether) to provide the desired product **4**. The major distereoisomers were characterized, unless otherwise noted.

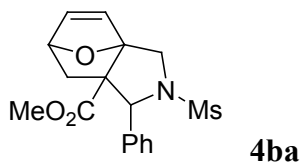

White solid (23 mg, 65%), mp: 149.2-151.5 °C, 79 % ee. The ee of the product was determined by HPLC using an AD-H column (n-Hexane / i-PrOH = 80/20, flow rate 0.5 ml/min,  $\lambda = 210$  nm,  $t_R = 45.2$  min (minor) and  $t_R = 48.0$  min (major).  $[\alpha]_D^{25} = -20$  ( $C = 1.16$ ,  $\text{CHCl}_3$ ).  $^1\text{H NMR}$  (300 MHz,  $\text{CDCl}_3$ )  $\delta$  7.38 – 7.23 (m, 5H), 6.50 (dd,  $J = 5.7, 1.7$  Hz, 1H), 6.36 (d,  $J = 5.7$  Hz, 1H), 5.20 (s, 1H), 4.83 (dd,  $J = 4.8, 1.7$  Hz, 1H), 4.33 (d,  $J = 11.0$  Hz, 1H), 4.08 (d,  $J = 11.0$  Hz, 1H), 3.76 (s, 3H), 2.79 (s, 3H), 1.80 (d,  $J = 12.4$  Hz, 1H), 1.57 (dd,  $J = 12.4, 4.8$  Hz, 1H).  $^{13}\text{C NMR}$  (125 MHz,  $\text{CDCl}_3$ )  $\delta$  173.83, 140.21, 139.79, 133.68, 128.65, 128.10, 97.93, 80.35, 69.01, 65.06, 52.98, 50.17, 38.68, 34.32. HRMS (ESI): calcd. for  $\text{C}_{17}\text{H}_{20}\text{NO}_5\text{S}$  ( $[\text{M}+\text{H}]^+$ ): 350.1057, found 350.1056.

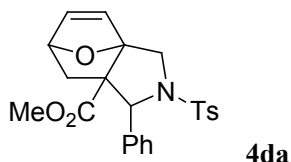

White solid (40.5 mg, 95%), mp: 167.9-168.5 °C, 90 % ee. The ee of the product was determined by HPLC using an AD-H column (n-Hexane / i-PrOH = 80/20, flow rate 0.5 ml/min,  $\lambda = 210$  nm, major diastereomer:  $t_R = 30.0$  min (minor) and  $t_R = 36.7$  min (major), minor diastereomer:  $t_R = 46.1$  min (major).  $[\alpha]_D^{25} = -75$  ( $C = 1.00$ ,  $\text{CHCl}_3$ ).  $^1\text{H NMR}$  (300 MHz,  $\text{CDCl}_3$ )  $\delta$  7.65 (d,  $J = 8.3$  Hz, 2H), 7.30 – 7.20 (m, 7H), 6.43 (dd,  $J = 5.7, 1.7$  Hz,



1H), 6.25 (d,  $J = 5.7$  Hz, 1H), 5.01 (s, 1H), 4.76 (dd,  $J = 4.7, 1.7$  Hz, 1H), 4.12 (s, 2H), 3.32 (s, 3H), 2.43 (s, 3H), 1.69 (d,  $J = 12.4$  Hz, 1H), 1.52 (dd,  $J = 12.4, 4.8$  Hz, 1H).  $^{13}\text{C}$  NMR (125 MHz,  $\text{CDCl}_3$ )  $\delta$  173.34, 143.57, 140.14, 140.11, 134.90, 133.57, 129.59, 128.03, 127.72, 97.18, 80.18, 68.95, 65.25, 52.46, 50.36, 34.69, 21.69. HRMS (ESI): calcd. for  $\text{C}_{23}\text{H}_{24}\text{NO}_5\text{S}$  ( $[\text{M}+\text{H}]^+$ ): 426.1370, found 426.1378.

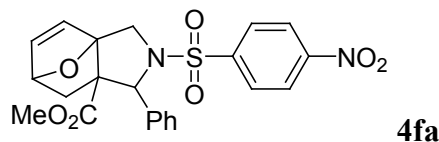

White solid (32.0 mg, 70%), mp: 39.6-42.1 °C, 87 % ee. The ee of the product was determined by HPLC using an OD-H column (n-Hexane / i-PrOH = 80/20, flow rate 0.5 ml/min,  $\lambda = 210$  nm, major diastereomer:  $t_R = 37.1$  min (major) and  $t_R = 43.9$  min (major), minor diastereomer:  $t_R = 50.3$  min (major).  $[\alpha]_D^{25} = -30$  ( $C = 1.05, \text{CHCl}_3$ ).  $^1\text{H}$  NMR (300 MHz,  $\text{CDCl}_3$ )  $\delta$  8.25 – 8.20 (m, 2H), 7.80 – 7.76 (m, 2H), 7.22-7.11 (m, 5H), 6.47 (dd,  $J = 5.7, 1.6$  Hz, 1H), 6.29 (d,  $J = 5.7$  Hz, 1H), 5.17 (s, 1H), 4.78 (dd,  $J = 4.7, 1.6$  Hz, 1H), 4.30 (d,  $J = 10.9$  Hz, 1H), 4.11 (d,  $J = 10.9$  Hz, 1H), 3.55 (s, 3H), 1.74 (d,  $J = 12.4$  Hz, 1H), 1.53 (dd,  $J = 12.4, 4.7$  Hz, 1H).  $^{13}\text{C}$  NMR (125 MHz,  $\text{CDCl}_3$ )  $\delta$  173.17, 150.04, 144.42, 140.24, 138.68, 133.42, 128.78, 128.38, 128.11, 124.03, 97.41, 80.29, 69.41, 65.07, 52.82, 50.49, 34.33. HRMS (ESI): calcd. for  $\text{C}_{22}\text{H}_{21}\text{N}_2\text{O}_7\text{S}$  ( $[\text{M}+\text{H}]^+$ ): 457.1064, found 457.1066.

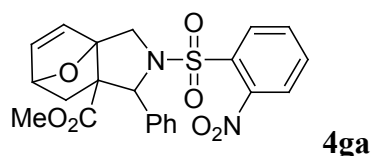

Colorless oil (31.5 mg, 70%), 85 % ee. The ee of the product was determined by HPLC using an OD-H column (n-Hexane / i-PrOH = 80/20, flow rate 0.5 ml/min,  $\lambda = 210$  nm,  $t_R = 29.2$  min (major) and  $t_R = 41.8$  min (minor).  $[\alpha]_D^{25} = -127$  ( $C = 1.04, \text{CHCl}_3$ ).  $^1\text{H}$  NMR (300 MHz,  $\text{CDCl}_3$ )  $\delta$  7.54-7.52 (m, 2H), 7.45 (d,  $J = 7.8$  Hz, 1H), 7.31-7.26 (m, 1H), 7.17-7.10 (m, 5H), 6.48 (d,  $J = 5.8$  Hz, 1H), 6.35 (d,  $J = 5.7$  Hz, 1H), 5.42 (s, 1H), 4.80 (d,  $J = 4.4$  Hz, 1H), 4.45 (d,  $J = 11.2$  Hz, 1H), 4.38 (d,  $J = 11.2$  Hz, 1H), 3.63 (s, 3H), 1.78 (d,  $J = 12.3$  Hz, 1H), 1.57 (dd,  $J = 12.3, 4.7$  Hz, 1H, 1H).  $^{13}\text{C}$  NMR (125 MHz,  $\text{CDCl}_3$ )  $\delta$  173.25, 140.06, 138.50, 133.66, 133.36, 132.42, 131.26, 131.02, 128.89, 128.21 (brs), 127.86, 123.68, 97.39, 80.27, 69.06, 65.23, 52.80, 50.68, 34.27. HRMS (ESI): calcd. for  $\text{C}_{22}\text{H}_{21}\text{N}_2\text{O}_7\text{S}$  ( $[\text{M}+\text{H}]^+$ ): 457.1064, found 457.1061.

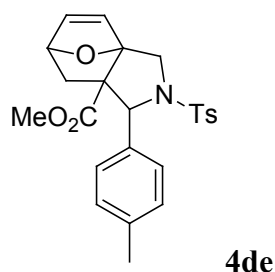

White solid (37.8 mg, 86 %), mp: 151.5-153.7 °C, 95 % ee. The ee of the product was determined by HPLC using an AD-H column (n-Hexane / i-PrOH = 80/20, flow rate 0.5 ml/min,  $\lambda = 210$  nm, major diastereomer:  $t_R = 27.0$  min (minor) and  $t_R = 36.1$  min (major), minor diastereomer:  $t_R = 44.4$  min (major).  $[\alpha]_D^{25} = -83$  ( $C = 1.00, \text{CHCl}_3$ ).  $^1\text{H}$  NMR (300 MHz,  $\text{CDCl}_3$ )  $\delta$  7.69 – 7.63 (m, 2H), 7.29



(d,  $J = 7.9$  Hz, 2H), 7.09 (m, 4H), 6.42 (dd,  $J = 5.7, 1.7$  Hz, 1H), 6.23 (d,  $J = 5.7$  Hz, 1H), 4.95 (s, 1H), 4.76 (dd,  $J = 4.6, 1.7$  Hz, 1H), 4.16 – 4.05 (m, 2H), 3.29 (s, 3H), 2.43 (s, 3H), 2.33 (s, 3H), 1.68 (d,  $J = 12.3$  Hz, 1H), 1.55 (dd,  $J = 12.4, 4.7$  Hz, 1H).  $^{13}\text{C}$  NMR (126 MHz,  $\text{CDCl}_3$ )  $\delta$  173.20, 143.35, 139.91, 137.13, 137.07, 134.63, 133.39, 129.40, 127.88, 96.89, 80.00, 68.62, 65.08, 52.22, 50.18, 34.55, 21.51, 21.17. HRMS (ESI): calcd. for  $\text{C}_{24}\text{H}_{26}\text{NO}_5\text{S}$  ( $[\text{M}+\text{H}]^+$ ): 440.1526, found 440.1522.

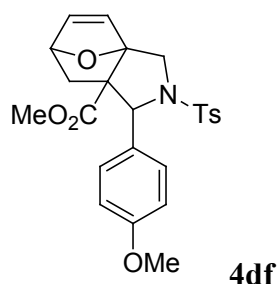

White solid (41.0 mg, 90 %), mp: 148.2-150.1 °C, 94 % ee. The ee of the product was determined by HPLC using an AD-H column (n-Hexane / i-PrOH = 80/20, flow rate 0.5 ml/min,  $\lambda = 210$  nm, major diastereomer:  $t_R = 37.8$  min (minor) and  $t_R = 56.7$  min (major), minor diastereomer:  $t_R = 73.9$  min (major).  $[\alpha]_D^{21} = -73$  (C = 0.56,  $\text{CHCl}_3$ ).  $^1\text{H}$  NMR (300 MHz,  $\text{CDCl}_3$ )  $\delta$  7.65 (d,  $J = 8.2$  Hz, 2H), 7.32 – 7.25 (m, 4H), 6.81 (dd,  $J = 7.5, 1.4$  Hz, 2H), 6.42 (dd,  $J = 5.7, 1.7$  Hz, 1H), 6.24 (d,  $J = 5.7$  Hz, 1H), 4.94 (s, 1H), 4.77 (dd,  $J = 4.6, 1.6$  Hz, 1H), 4.14 – 4.06 (m, 2H), 3.80 (s, 3H), 3.29 (s, 3H), 2.42 (s, 3H), 1.68 (d,  $J = 12.3$  Hz, 1H), 1.56 (dd,  $J = 12.3, 4.7$  Hz, 1H).  $^{13}\text{C}$  NMR (125 MHz,  $\text{CDCl}_3$ )  $\delta$  173.35, 159.06, 143.47, 140.05, 134.88, 133.55, 132.28, 129.53, 127.96, 96.98, 80.13, 68.52, 65.27, 55.36, 52.37, 50.29, 34.68, 21.64. HRMS (ESI): calcd. for  $\text{C}_{24}\text{H}_{26}\text{NO}_6\text{S}$  ( $[\text{M}+\text{H}]^+$ ): 456.1475, found 456.1473.

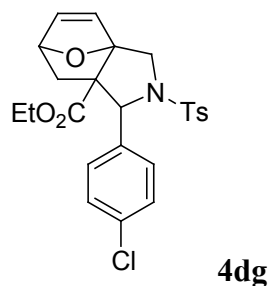

White solid (46.3 mg, 98 %), mp: 123.3-125.0 °C.  $^1\text{H}$  NMR (300 MHz,  $\text{CDCl}_3$ )  $\delta$  7.61 (d,  $J = 8.3$  Hz, 2H), 7.28 – 7.22 (m, 6H), 6.44 (dd,  $J = 5.7, 1.7$  Hz, 1H), 6.28 (d,  $J = 5.7$  Hz, 1H), 5.02 (s, 1H), 4.76 (dd,  $J = 4.7, 1.7$  Hz, 1H), 4.15 (d,  $J = 10.7$  Hz, 1H), 4.07 (d,  $J = 10.7$  Hz, 1H), 4.06-3.97 (m, 1H), 3.78 – 3.67 (m, 1H), 2.42 (s, 3H), 1.70 (d,  $J = 12.4$  Hz, 1H), 1.50 (dd,  $J = 12.4, 4.8$  Hz, 1H), 1.10 (t,  $J = 7.1$  Hz, 3H).  $^{13}\text{C}$  NMR (125 MHz,  $\text{CDCl}_3$ )  $\delta$  172.62, 143.76, 140.02, 138.75, 135.11, 133.51, 133.43, 129.60, 127.86, 97.09, 80.08, 68.31, 65.11, 61.56, 50.27, 34.80, 21.66, 14.11. HRMS (ESI): calcd. for  $\text{C}_{24}\text{H}_{25}\text{ClNO}_5\text{S}$  ( $[\text{M}+\text{H}]^+$ ): 474.1136, found 474.1138.

Ee of enantiomers of **4dg** can not be separated by chiral HPLC columns. Therefore, compound **4dg'** was prepared for chiral HPLC analysis. A mixture of sulfonamide **1d** (0.1 mmol), MBH carbonate **2g** (0.13 mmol), 4 Å molecular sieves (20 mg) and  $(\text{DHQD})_2\text{AQN}$  (0.01 mmol), was dissolved in *m*-xylene (0.25 mL). After reaction mixture was stirred at 25 °C for 96 hrs, DIBAL-H (0.25 mL, 1.0 M in hexane) was added dropwise. The solution was stirred at rt for 10hrs. Upon completion, cold water (5 mL) was added at 0 °C and the aqueous phase extracted with ethyl acetate (3×8 mL). The combined organic solvent was dried with  $\text{Na}_2\text{SO}_4$ , filtered, concentrated in *vacuo* and purified by flash chromatography to give **4dg'**, which is analyzed by chiral HPLC.

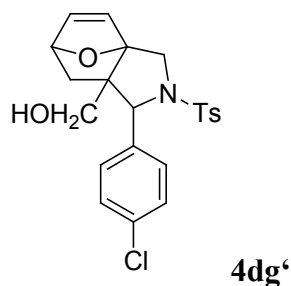

Colorless oil (32.4 mg, 75 %), 93 % ee. The ee of the product was determined by HPLC using an AD-H column (n-Hexane / i-PrOH = 80/20, flow rate 0.5 ml/min,  $\lambda$  = 210 nm, major diastereomer:  $t_R$  = 27.1 min (major) and  $t_R$  = 22.4 min (minor), minor diastereomer:  $t_R$  = 21.0 min (major) and  $t_R$  = 19.7 min (minor).  $[\alpha]_D^{25}$  = -43 (C = 1.08, CHCl<sub>3</sub>). <sup>1</sup>H NMR (500 MHz, CDCl<sub>3</sub>)  $\delta$  7.62 (d,  $J$  = 8.2 Hz, 2H), 7.23 (d,  $J$  = 8.0 Hz, 2H), 7.19-7.09 (m, 4H), 6.41 (dd,  $J$  = 5.8, 1.5 Hz, 1H), 6.34 (d,  $J$  = 5.8 Hz, 1H), 5.01 (s, 1H), 4.70 (dd,  $J$  = 4.9, 1.4 Hz, 1H), 4.01 (d,  $J$  = 10.8 Hz, 1H), 3.96 (d,  $J$  = 10.8 Hz, 1H), 3.42 (d,  $J$  = 10.6 Hz, 1H), 3.03 (d,  $J$  = 10.5 Hz, 1H), 2.40 (s, 3H), 1.41 (dd,  $J$  = 12.2, 4.9 Hz, 1H), 0.69 (d,  $J$  = 12.2 Hz, 1H). <sup>13</sup>C NMR (125 MHz, CDCl<sub>3</sub>)  $\delta$  143.75, 140.15, 138.63, 135.21, 133.48, 132.83, 129.56, 127.94, 96.71, 79.44, 69.61, 68.10, 60.54, 50.73, 33.79, 21.73. HRMS (ESI): calcd. for C<sub>22</sub>H<sub>23</sub>ClNO<sub>4</sub>S ([M+H]<sup>+</sup>): 432.1031, found 432.1038.

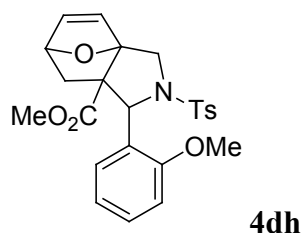

White solid (37.8 mg, 83 %), mp: 182.7-185.0°C, 88 % ee. The ee of the product was determined by HPLC using an AD-H column (n-Hexane / i-PrOH = 80/20, flow rate 0.5 ml/min,  $\lambda$  = 210 nm, major diastereomer:  $t_R$  = 24.6 min (minor) and  $t_R$  = 35.5 min (major), minor diastereomer:  $t_R$  = 27.2 min (major).  $[\alpha]_D^{25}$  = -128 (C = 0.84, CHCl<sub>3</sub>). <sup>1</sup>H NMR (300 MHz, CDCl<sub>3</sub>)  $\delta$  7.74 (d,  $J$  = 8.3 Hz, 2H), 7.50 (d,  $J$  = 7.8 Hz, 1H), 7.35 (d,  $J$  = 8.3 Hz, 2H), 7.30 – 7.18 (m, 1H), 6.95 (t,  $J$  = 7.4 Hz, 1H), 6.82 (d,  $J$  = 8.0 Hz, 1H), 6.42 (dd,  $J$  = 5.7, 1.6 Hz, 1H), 6.14 (d,  $J$  = 5.8 Hz, 1H), 5.36 (s, 1H), 4.70 (dd,  $J$  = 4.8, 1.6 Hz, 1H), 4.13 (d,  $J$  = 10.6 Hz, 1H), 4.02 (d,  $J$  = 10.7 Hz, 1H), 3.79 (s, 3H), 3.19 (s, 3H), 2.45 (s, 3H), 1.82 (d,  $J$  = 12.3 Hz, 1H), 1.36 (dd,  $J$  = 12.3, 4.8 Hz, 1H). <sup>13</sup>C NMR (126 MHz, CDCl<sub>3</sub>)  $\delta$  172.84, 155.62, 143.31, 140.12, 134.35, 132.65, 129.44, 129.31, 128.59, 128.36, 128.17, 120.50, 109.38, 97.09, 80.03, 64.34, 62.98, 55.37, 51.95, 50.05, 34.03, 21.52. HRMS (ESI): calcd. for C<sub>24</sub>H<sub>26</sub>NO<sub>6</sub>S ([M+H]<sup>+</sup>): 456.1475, found 456.1481.

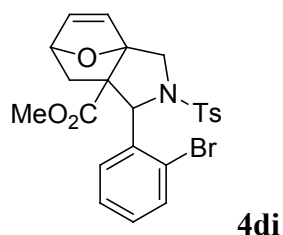

White solid (48.9 mg, 97 %), mp: 182.3-184.5°C, 91 % ee. The ee of the product was determined by HPLC using an AD-H column (n-Hexane / i-PrOH = 80/20, flow rate 0.5 ml/min,  $\lambda$  = 210 nm,  $t_R$  = 34.7 min (minor) and  $t_R$  =

46.3 min (major).  $[\alpha]_{\text{D}}^{25} = -75$  ( $C = 1.00$ ,  $\text{CHCl}_3$ ).  $^1\text{H NMR}$  (300 MHz,  $\text{CDCl}_3$ )  $\delta$  7.78 (d,  $J = 8.3$  Hz, 2H), 7.67 (dd,  $J = 7.9, 1.8$  Hz, 1H), 7.51 (dd,  $J = 8.0, 1.2$  Hz, 1H), 7.38 (d,  $J = 8.0$  Hz, 2H), 7.34-7.29 (m, 1H), 7.16 – 7.11 (m, 1H), 6.47 (dd,  $J = 5.8, 1.7$  Hz, 1H), 6.12 (d,  $J = 5.7$  Hz, 1H), 5.39 (s, 1H), 4.76 (dd,  $J = 4.8, 1.7$  Hz, 1H), 4.22 (d,  $J = 10.7$  Hz, 1H), 3.99 (d,  $J = 10.6$  Hz, 1H), 3.16 (s, 3H), 2.46 (s, 3H), 1.94 (d,  $J = 12.5$  Hz, 1H), 1.36 (dd,  $J = 12.4, 4.9$  Hz, 1H).  $^{13}\text{C NMR}$  (125 MHz,  $\text{CDCl}_3$ )  $\delta$  172.32, 143.79, 140.59, 139.57, 133.76, 132.16, 131.91, 131.52, 129.71, 129.07, 128.38, 127.49, 123.27, 97.54, 80.32, 67.53, 64.37, 52.31, 50.20, 34.21, 21.65. HRMS (ESI): calcd. for  $\text{C}_{23}\text{H}_{23}\text{BrNO}_5\text{S}$  ( $[\text{M}+\text{H}]^+$ ): 504.0475, found 504.0477.

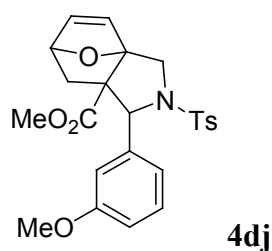

White solid (44.2 mg, 97 %), mp: 65.1-67.3°C, 90 % ee. The ee of the product was determined by HPLC using an AD-H column (n-Hexane / i-PrOH = 80/20, flow rate 0.5 ml/min,  $\lambda = 210$  nm, major diastereomer:  $t_{\text{R}} = 31.4$  min (minor) and  $t_{\text{R}} = 40.8$  min (major), minor diastereomer:  $t_{\text{R}} = 44.5$  min (major).  $[\alpha]_{\text{D}}^{25} = -72$  ( $C = 0.93$ ,  $\text{CHCl}_3$ ).  $^1\text{H NMR}$  (300 MHz,  $\text{CDCl}_3$ )  $\delta$  7.64 (d,  $J = 8.2$  Hz, 2H), 7.28 (d,  $J = 8.3$  Hz, 2H), 7.19 (t,  $J = 7.9$  Hz, 1H), 6.94-6.63 (m, 3H), 6.43 (dd,  $J = 5.7, 1.7$  Hz, 1H), 6.24 (d,  $J = 5.7$  Hz, 1H), 4.98 (s, 1H), 4.77 (dd,  $J = 4.7, 1.7$  Hz, 1H), 4.11 (s, 2H), 3.72 (s, 3H), 3.34 (s, 3H), 2.42 (s, 3H), 1.70 (d,  $J = 12.4$  Hz, 1H), 1.54 (dd,  $J = 12.4, 4.7$  Hz, 1H).  $^{13}\text{C NMR}$  (126 MHz,  $\text{CDCl}_3$ )  $\delta$  173.11, 143.39, 141.46, 139.94, 133.31, 129.43, 129.39, 127.82, 113.63, 96.90, 79.95, 68.65, 65.04, 55.12, 52.30, 50.19, 34.49, 21.49. HRMS (ESI): calcd. for  $\text{C}_{24}\text{H}_{26}\text{NO}_6\text{S}$  ( $[\text{M}+\text{H}]^+$ ): 456.1475, found 456.1479.

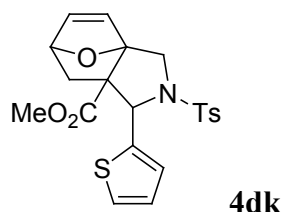

White solid (42.3 mg, 98 %), mp: 149.6-151.9°C, 86 % ee. The ee of the product was determined by HPLC using an AD-H column (n-Hexane / i-PrOH = 90/10, flow rate 0.5 ml/min,  $\lambda = 210$  nm,  $t_{\text{R}} = 54.4$  min (minor) and  $t_{\text{R}} = 87.6$  min (major).  $[\alpha]_{\text{D}}^{25} = -14$  ( $C = 0.73$ ,  $\text{CHCl}_3$ ).  $^1\text{H NMR}$  (300 MHz,  $\text{CDCl}_3$ )  $\delta$  7.60 – 7.56 (m, 2H), 7.25 – 7.20 (m, 3H), 6.93 – 6.878 (m, 2H), 6.49 (dd,  $J = 5.7, 1.7$  Hz, 1H), 6.27 (d,  $J = 5.7$  Hz, 1H), 5.39 (s, 1H), 4.89 (dd,  $J = 3.7, 1.3$  Hz, 1H), 4.13 (d,  $J = 10.7$  Hz, 1H), 4.00 (d,  $J = 10.7$  Hz, 1H), 3.43 (s, 3H), 2.40 (s, 3H), 1.82-1.79 (m, 2H).  $^{13}\text{C NMR}$  (125 MHz,  $\text{CDCl}_3$ )  $\delta$  172.91, 143.92, 143.45, 140.18, 135.63, 133.33, 129.53, 127.74, 127.56, 126.62, 126.31, 97.18, 80.24, 64.90, 64.72, 52.66, 49.73, 34.67, 21.70. HRMS (ESI): calcd. for  $\text{C}_{21}\text{H}_{22}\text{NO}_5\text{S}_2$  ( $[\text{M}+\text{H}]^+$ ): 432.0934, found 432.0935.

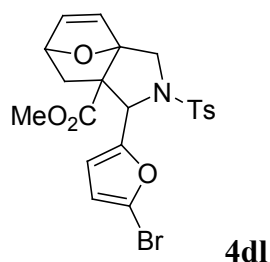

White solid (46.5 mg, 94 %), mp: 145.2-147.0°C, 81 % ee. The ee of the product was determined by HPLC using an AD-H column (n-Hexane / i-PrOH = 80/20, flow rate 0.5 ml/min,  $\lambda$  = 210 nm, major diastereomer:  $t_R$  = 30.2 min (minor) and  $t_R$  = 46.0 min (major), minor diastereomer:  $t_R$  = 36.1 min (major) and  $t_R$  = 42.7 min (minor).  $[\alpha]_D^{25}$  = -74 (C = 1.02, CHCl<sub>3</sub>). <sup>1</sup>H NMR (300 MHz, CDCl<sub>3</sub>)  $\delta$  7.69 (d,  $J$  = 8.2 Hz, 2H), 7.32 (d,  $J$  = 8.3 Hz, 2H), 6.48 (dd,  $J$  = 5.7, 1.7 Hz, 1H), 6.29 (dd,  $J$  = 3.4, 0.8 Hz, 1H), 6.23 (dd,  $J$  = 3.4, 0.4 Hz, 1H), 6.20 (d,  $J$  = 5.8 Hz, 1H), 5.07 (s, 1H), 4.88 (dd,  $J$  = 4.7, 1.7 Hz, 1H), 4.02 (m, 2H), 3.31 (s, 3H), 2.44 (s, 3H), 1.86 (d,  $J$  = 12.5 Hz, 1H), 1.63 (dd,  $J$  = 12.5, 4.8 Hz, 1H). <sup>13</sup>C NMR (126 MHz, CDCl<sub>3</sub>)  $\delta$  172.11, 155.14, 143.65, 140.01, 134.66, 132.63, 129.55, 127.77, 120.50, 112.62, 112.31, 97.12, 80.09, 64.23, 62.24, 52.40, 49.31, 34.16, 21.55. HRMS (ESI): calcd. for C<sub>21</sub>H<sub>21</sub>BrNO<sub>6</sub>S ([M+H]<sup>+</sup>): 494.0267, found 494.0257.

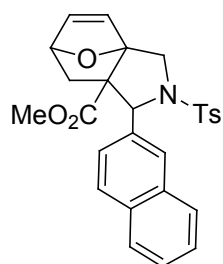

**4dm**

White solid (47.0 mg, 99 %), mp: 152.6-154.7°C, 94 % ee. The ee of the product was determined by HPLC using an AD-H column (n-Hexane / i-PrOH = 80/20, flow rate 0.5 ml/min,  $\lambda$  = 210 nm, major diastereomer:  $t_R$  = 38.5 min (minor) and  $t_R$  = 50.0 min (major), minor diastereomer:  $t_R$  = 56.6 min (major).  $[\alpha]_D^{21}$  = -99 (C = 0.74, CHCl<sub>3</sub>). <sup>1</sup>H NMR (300 MHz, CDCl<sub>3</sub>)  $\delta$  7.81 – 7.73 (m, 3H), 7.64 (d,  $J$  = 7.9 Hz, 3H), 7.46-7.43 (m, 2H), 7.24-7.21 (m, 3H), 6.41 (dd,  $J$  = 5.7, 1.4 Hz, 1H), 6.26 (d,  $J$  = 5.7 Hz, 1H), 5.18 (s, 1H), 4.71 (brs, 1H), 4.19 (s, 2H), 3.35 (s, 3H), 2.36 (s, 3H), 1.69 (d,  $J$  = 12.4 Hz, 1H), 1.51 (dd,  $J$  = 12.4, 4.7 Hz, 1H). <sup>13</sup>C NMR (126 MHz, CDCl<sub>3</sub>)  $\delta$  173.26, 143.57, 140.06, 133.41, 133.06, 129.51, 128.12, 128.08, 128.05, 128.04, 127.92, 127.83, 127.71, 126.07, 80.09, 69.00, 52.47, 50.39, 34.69, 21.56. HRMS (ESI): calcd. for C<sub>27</sub>H<sub>26</sub>NO<sub>5</sub>S ([M+H]<sup>+</sup>): 476.1526, found 476.1529.

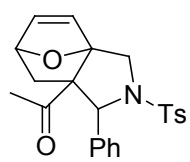

**4do**

According to the general procedure, compound **4do** was isolated as an unstable compound which resulted in an endo-/exo-mixture of **4do** at room temperature. Therefore, compound **4do'** was prepared for characterization and chiral HPLC analysis. A mixture of sulfonamide **1d** (0.1 mmol), MBH carbonate **2o** (0.13 mmol), 4Å molecular sieves (20 mg) and (DHQD)<sub>2</sub>AQN (0.01 mmol), was dissolved in *m*-xylene (0.25 mL). After reaction mixture was stirred at 25 °C for 48 hrs, DIBAL-H (0.25 mL, 1.0 M in hexane) was added dropwise. The solution was stirred at rt

for 10hrs. Upon completion, cold water (5 mL) was added at 0°C and the aqueous phase extracted with ethyl acetate (3×8 mL). The combined organic solvent was dried with Na<sub>2</sub>SO<sub>4</sub>, filtered, concentrated in *vacuo* and purified by flash chromatography to give **4do'**, which is stable and analyzed by chiral HPLC.

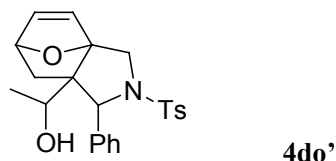

Yellow oil (28.8 mg, 70 %), 91 % ee. The ee of the product was determined by HPLC using an AD-H column (n-Hexane / i-PrOH = 80/20, flow rate 0.5 ml/min,  $\lambda$  = 210 nm,  $t_R$  = 17.5 min (minor) and  $t_R$  = 22.5 min (major).  $[\alpha]_D^{25}$  = -49 (C = 0.95, CHCl<sub>3</sub>). <sup>1</sup>H NMR (500 MHz, CDCl<sub>3</sub>)  $\delta$  7.62 (d,  $J$  = 8.1 Hz, 2H), 7.45 (d,  $J$  = 6.6 Hz, 1H), 7.25 – 7.14 (m, 5H), 6.99 (d,  $J$  = 6.1 Hz, 1H), 6.42 (d,  $J$  = 5.7 Hz, 1H), 6.38 (d,  $J$  = 5.7 Hz, 1H), 4.99 (s, 1H), 4.64 (d,  $J$  = 4.8 Hz, 1H), 4.04 (d,  $J$  = 10.2 Hz, 1H), 3.96 (d,  $J$  = 10.2 Hz, 1H), 3.23-3.18 (m, 1H), 2.37 (s, 3H), 1.38 (dd,  $J$  = 12.1, 4.9 Hz, 1H), 1.20 (d,  $J$  = 6.3 Hz, 3H), 0.54 (d,  $J$  = 12.1 Hz, 1H). <sup>13</sup>C NMR (125 MHz, CDCl<sub>3</sub>)  $\delta$  143.33, 141.70, 138.24, 135.40, 133.92, 129.41, 129.33, 128.52, 128.01, 127.60, 127.31, 126.83, 97.83, 78.81, 73.90, 64.10, 63.49, 51.09, 34.60, 21.65, 21.02. HRMS (ESI): calcd. for C<sub>23</sub>H<sub>26</sub>NO<sub>4</sub>S ([M+H]<sup>+</sup>): 412.1577, found 412.1577.

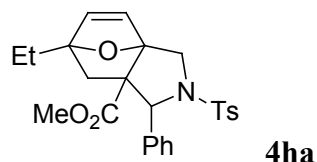

White solid (39.5 mg, 87 %), mp: 118.5-120.2°C, 89 % ee. The ee of the product was determined by HPLC using an AD-H column (n-Hexane / i-PrOH = 90/10, flow rate 0.5 ml/min,  $\lambda$  = 210 nm, major diastereomer:  $t_R$  = 33.9 min (minor) and  $t_R$  = 37.2 min (major), minor diastereomer:  $t_R$  = 45.3 min (major).  $[\alpha]_D^{25}$  = -48 (C = 0.95, CHCl<sub>3</sub>). <sup>1</sup>H NMR (300 MHz, CDCl<sub>3</sub>)  $\delta$  7.67 – 7.63 (m, 2H), 7.35 – 7.15 (m, 7H), 6.32 (d,  $J$  = 5.7 Hz, 1H), 6.24 (d,  $J$  = 5.7 Hz, 1H), 5.00 (s, 1H), 4.10 (s, 2H), 3.32 (s, 3H), 2.42 (s, 3H), 1.70 (d,  $J$  = 12.3 Hz, 1H), 1.60 (q,  $J$  = 7.2, 2H), 1.27 (d,  $J$  = 12.3 Hz, 1H), 0.73 (t,  $J$  = 7.5 Hz, 3H). <sup>13</sup>C NMR (126 MHz, CDCl<sub>3</sub>)  $\delta$  173.24, 143.33, 142.00, 139.97, 134.83, 133.76, 129.39, 127.82, 127.51, 96.37, 92.11, 68.80, 67.55, 52.22, 50.41, 38.01, 25.18, 21.50, 8.69. HRMS (ESI): calcd. for C<sub>25</sub>H<sub>28</sub>NO<sub>5</sub>S ([M+H]<sup>+</sup>): 454.1683, found 454.1684.

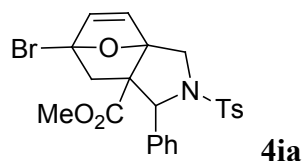

White solid (50.0 mg, 99 %), mp: 164.7-167.1°C, 91 % ee. The ee of the product was determined by HPLC using an AD-H column (n-Hexane / i-PrOH = 80/20, flow rate 0.5 ml/min,  $\lambda$  = 210 nm, major diastereomer:  $t_R$  = 18.7 min (minor) and  $t_R$  = 25.6 min (major), minor diastereomer:  $t_R$  = 24.3 min (major) and  $t_R$  = 27.4 min (minor).  $[\alpha]_D^{25}$  = -42 (C = 0.86, CHCl<sub>3</sub>). <sup>1</sup>H NMR (300 MHz, CDCl<sub>3</sub>)  $\delta$  7.65 – 7.53 (m, 2H), 7.37 – 7.17 (m, 7H), 6.45 (d,  $J$  = 5.5 Hz, 1H), 6.30 (d,  $J$  = 5.5 Hz, 1H), 4.19 – 4.06 (m, 2H), 3.42 (s, 3H), 2.42 (s, 3H), 2.30 (d,  $J$  = 12.6 Hz, 1H), 1.80 (d,  $J$  = 12.6 Hz, 1H). <sup>13</sup>C NMR (126 MHz, CDCl<sub>3</sub>)  $\delta$  171.96, 143.59, 143.42, 138.99, 134.77, 134.34, 129.44, 128.06, 127.75, 95.54, 88.95, 68.76, 68.13, 52.67, 49.96, 45.36, 21.52. HRMS (ESI): calcd. for C<sub>23</sub>H<sub>23</sub>BrNO<sub>5</sub>S ([M+H]<sup>+</sup>): 504.0475, found 504.0478.

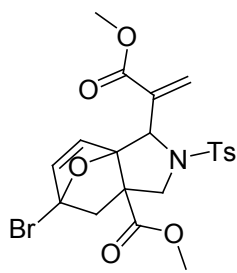

7

Yellow oil (28.2 mg, 55 %), 83 % ee. The ee of the product was determined by HPLC using an AD-H column (n-Hexane / i-PrOH = 90/10, flow rate 0.5 ml/min,  $\lambda = 210$  nm,  $t_R = 43.5$  min (major) and  $t_R = 49.7$  min (minor).  $[\alpha]_D^{21} = +2$  (C = 0.3, CHCl<sub>3</sub>). <sup>1</sup>H NMR (300 MHz, CDCl<sub>3</sub>)  $\delta$  7.71 (d,  $J = 8.2$  Hz, 2H), 7.36 (d,  $J = 8.0$  Hz, 2H), 6.64 (s, 1H), 6.34 (d,  $J = 5.7$  Hz, 1H), 6.29 (d,  $J = 0.7$  Hz, 1H), 6.04 (d,  $J = 5.7$  Hz, 1H), 4.82 (s, 1H), 4.47 (d,  $J = 9.4$  Hz, 1H), 3.81 (s, 3H), 3.60 (s, 3H), 3.11 (d,  $J = 9.4$  Hz, 1H), 2.45 (s, 3H), 2.33 (d,  $J = 12.0$  Hz, 1H), 2.27 (d,  $J = 11.9$  Hz, 1H). <sup>13</sup>C NMR (126 MHz, CDCl<sub>3</sub>)  $\delta$  171.15, 165.91, 144.34, 139.33, 136.03, 133.62, 131.96, 130.55, 129.85, 128.04, 97.98, 88.21, 60.36, 59.92, 56.75, 52.55, 52.23, 50.40, 21.63. HRMS (ESI): calcd. for C<sub>21</sub>H<sub>23</sub>BrNO<sub>7</sub>S ([M+H]<sup>+</sup>): 512.0373, found 512.0378.

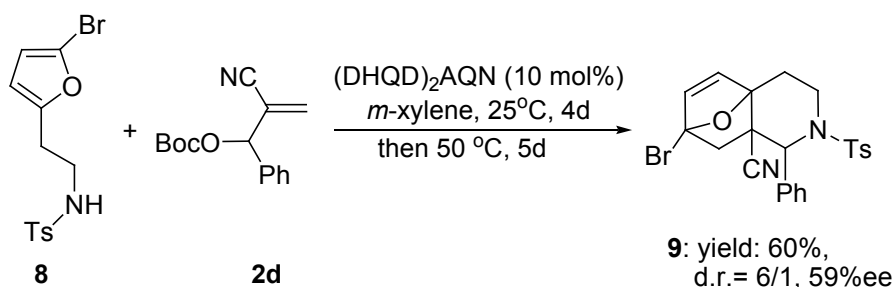

A mixture of sulfonamide **8** (0.1 mmol),<sup>5</sup> MBH carbonate **2d** (0.13 mmol), 4Å molecular sieves (20 mg) and (DHQD)<sub>2</sub>AQN (0.01 mmol), was dissolved in *m*-xylene (0.25 mL). After reaction mixture was stirred at 25 °C for 4 days, the reaction was allowed to warm to 50 °C for 5 days. The mixture was filtrated through a pad of Celite and the precipitate washed with dichloromethane. The organic phase was evaporated in vapor and the residue was purified by flash chromatography (silica gel, EtOAc/petroleum ether) to provide the desired product **9**.

Light yellow oil (29.0 mg, 60 %, dr = 6/1), 59 % ee. The ee of the product was determined by HPLC using an OD-H column (n-Hexane / i-PrOH = 80/20, flow rate 0.5 ml/min,  $\lambda = 210$  nm, major diastereomer:  $t_R = 27.3$  min (minor) and  $t_R = 30.1$  min (major). minor diastereomer:  $t_R = 45.7$  min (the peaks of minor diastereomer are overlapped).  $[\alpha]_D^{25} = +14$  (C = 1.11, CHCl<sub>3</sub>). <sup>1</sup>H NMR (300 MHz, CDCl<sub>3</sub>)  $\delta$  7.47 – 7.16 (m, 7H), 7.11 (d,  $J = 8.4$  Hz, 2H), 6.64 (d,  $J = 5.5$  Hz, 1H), 6.42 (d,  $J = 5.5$  Hz, 1H), 4.23 (s, 1H), 4.31 – 4.19 (m, 1H), 3.60 – 3.51 (m, 1H), 2.75–2.66 (m, 1H), 2.39 (s, 3H), 2.45 – 2.35 (m, 1H), 2.22 (d,  $J = 12.6$  Hz, 1H), 2.13 (d,  $J = 12.6$  Hz, 1H). <sup>13</sup>C NMR (125 MHz, CDCl<sub>3</sub>)  $\delta$  143.68, 143.45, 138.02, 136.89, 133.70, 130.93, 129.52, 129.27, 128.16, 127.51, 120.52, 88.24, 88.05, 67.45, 50.53, 48.81, 44.47, 27.60, 21.71. HRMS (ESI): calcd. for C<sub>23</sub>H<sub>22</sub>BrN<sub>2</sub>O<sub>3</sub>S ([M+H]<sup>+</sup>): 485.0529, found 485.0535.

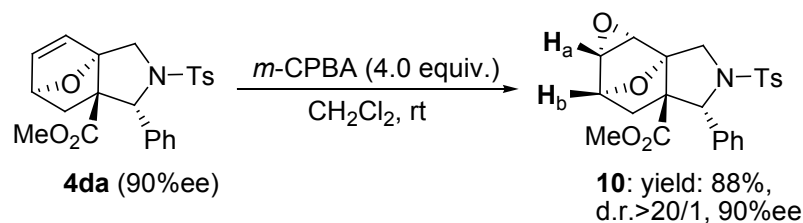

A solution of **4da** (42.6 mg, 0.1 mmol) and *m*-CPBA (69.0 mg, 0.4 mmol) in CH<sub>2</sub>Cl<sub>2</sub> (2 mL) was stirred at 25 °C for 16 hrs.<sup>6</sup> Upon completion, the reaction mixture was poured into water (30 mL) and basified with sat. NaHCO<sub>3</sub> (aq.) to pH=9-10. The organic layer was separated and the water layer was extracted with CH<sub>2</sub>Cl<sub>2</sub> (3\*30 mL). The combined organic layers were washed with water (2\*20 mL). Then the organic phase was dried by anhydrous Na<sub>2</sub>SO<sub>4</sub> and evaporated in vapor. The residue was purified by flash chromatography (silica gel, petroleum ether/ EtOAc: 10/1 to 3/1 gradient) to provide the desired product **10**.

White solid (38.6 mg, 88%), mp: 118.4-120 °C, 90 % ee. The ee of the product was determined by HPLC using an AD-H column (n-Hexane / i-PrOH = 70/30, flow rate 0.5 ml/min, λ = 210 nm, t<sub>R</sub> = 43.3 min (minor) and t<sub>R</sub> = 53.9 min (major)). [α]<sub>D</sub><sup>25</sup> = -129 (C = 1.10, CHCl<sub>3</sub>). <sup>1</sup>H NMR (300 MHz, CDCl<sub>3</sub>) δ 7.61 (d, *J* = 8.3 Hz, 2H), 7.35 – 7.13 (m, 7H), 4.94 (s, 1H), 4.26 (d, *J* = 5.3 Hz, 1H<sub>a</sub>), 4.11 (d, *J* = 10.9 Hz, 1H), 4.02 (d, *J* = 10.9 Hz, 1H), 3.48 (s, 3H), 3.35 (d, *J* = 3.3 Hz, 1H), 3.30 (d, *J* = 3.3 Hz, 1H), 2.43 (s, 3H), 1.90 (d, *J* = 13.4 Hz, 1H), 1.49 (dd, *J* = 13.4, 5.4 Hz, 1H). <sup>13</sup>C NMR (125 MHz, CDCl<sub>3</sub>) δ 172.20, 143.64, 139.16, 134.71, 129.52, 128.48, 127.90, 127.85, 92.27, 75.96, 69.34, 67.22, 52.81, 49.80, 49.16, 48.29, 34.99, 21.59. HRMS (ESI): calcd. for C<sub>23</sub>H<sub>24</sub>NO<sub>6</sub>S ([M+H]<sup>+</sup>): 442.1319, found 442.1319.

Because the corresponding *J*<sub>H<sub>a</sub>-H<sub>b</sub></sub> value is really small (the bridged H<sub>b</sub> is a doublet), the relative stereochemistry between H<sub>a</sub> and H<sub>b</sub> could be assigned to be syn, which is also confirmed by NOESY-spectrum.

## Reference

1. A. Kamal, J. S. Reddy, E. V. Bharathi, D. Dastagiri, *Tetrahedron Letters*. **2008**, *49*, 348.
2. C. Ouairy, P. Michel, B. Delpech, D. Crich, C. Marazano, *J. Org. Chem.* **2010**, *75*, 4311.
3. J. Feng, X. Lu, A. Kong, X. Han, *Tetrahedron*, **2007**, *63*, 6035.
4. D. J. V. C. van Steenis, T. Marcelli, M. A. L. Lutz, Spek, J. H. Van Maarseveen, H. Hiemstra, *Adv. Synth. Catal.* **2007**, *349*, 281.
5. M.E. Jung, S, J. Miller, *Heterocycles*. **1990**, *30*, 839.
6. J. Hu, B. Tian, X.-Y. Wu, X.-F. Tong, *Org. Lett.* **2012**, *14*, 5074.



## V. Crystal data and structure refinement for enantiopure **4di**

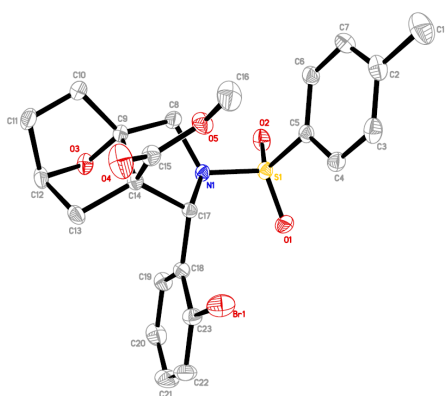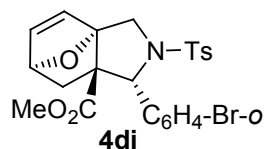

Table 1. Crystal data and structure refinement for compound **4di**.

|                                 |                                                                                                       |
|---------------------------------|-------------------------------------------------------------------------------------------------------|
| Identification code             | <b>4di</b>                                                                                            |
| Empirical formula               | C <sub>23</sub> H <sub>22</sub> Br N O <sub>5</sub> S                                                 |
| Formula weight                  | 504.39                                                                                                |
| Temperature                     | 291(2) K                                                                                              |
| Wavelength                      | 0.71073 Å                                                                                             |
| Crystal system, space group     | Orthorhombic, P2(1)2(1)2(1)                                                                           |
| Unit cell dimensions            | a = 7.7952(16) Å alpha = 90 deg.<br>b = 13.733(3) Å beta = 90 deg.<br>c = 21.171(4) Å gamma = 90 deg. |
| Volume                          | 2266.4(8) Å <sup>3</sup>                                                                              |
| Z, Calculated density           | 4, 1.478 Mg/m <sup>3</sup>                                                                            |
| Absorption coefficient          | 1.940 mm <sup>-1</sup>                                                                                |
| F(000)                          | 1032                                                                                                  |
| Crystal size                    | 0.45 x 0.32 x 0.31 mm                                                                                 |
| Theta range for data collection | 3.00 to 27.47 deg.                                                                                    |

Limiting indices             $-10 \leq h \leq 9, -17 \leq k \leq 17, -27 \leq l \leq 27$

Reflections collected / unique    21522 / 5156 [R(int) = 0.0416]

Completeness to theta = 27.47    99.7 %

Absorption correction            Semi-empirical from equivalents

Max. and min. transmission       0.5837 and 0.4776

Refinement method                Full-matrix least-squares on  $F^2$

Data / restraints / parameters    5156 / 0 / 282

Goodness-of-fit on  $F^2$             1.039

Final R indices [ $I > 2\sigma(I)$ ]    R1 = 0.0357, wR2 = 0.0870

R indices (all data)                R1 = 0.0475, wR2 = 0.0922

Absolute structure parameter      0.008(7)

Largest diff. peak and hole       0.724 and -0.408 e. $\text{\AA}^{-3}$

## VI. HPLC Spectra

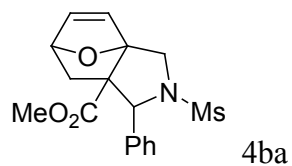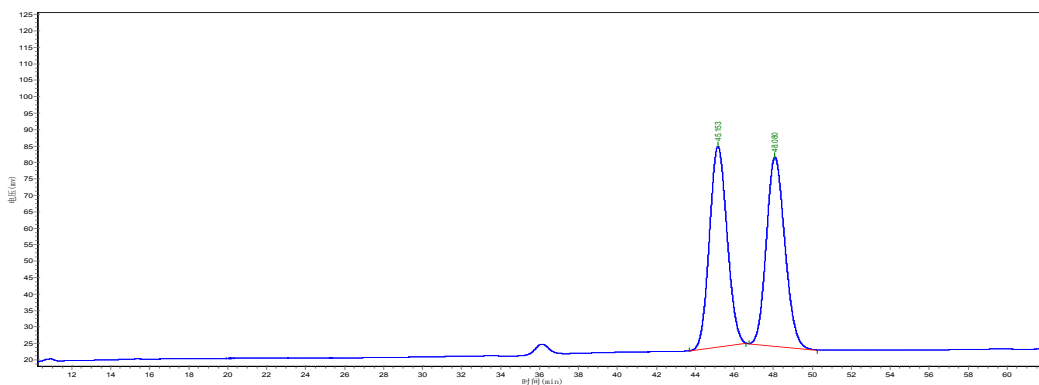

Result Table

| Peak# | Ret. Time/min | Height/ $\mu$ V | Area/ $\mu$ V's | Area%    |
|-------|---------------|-----------------|-----------------|----------|
| 1     | 45.153        | 60984.555       | 3832883.000     | 50.2898  |
| 2     | 48.080        | 57498.477       | 3788711.000     | 49.7102  |
| total |               | 118483.031      | 7621594.000     | 100.0000 |

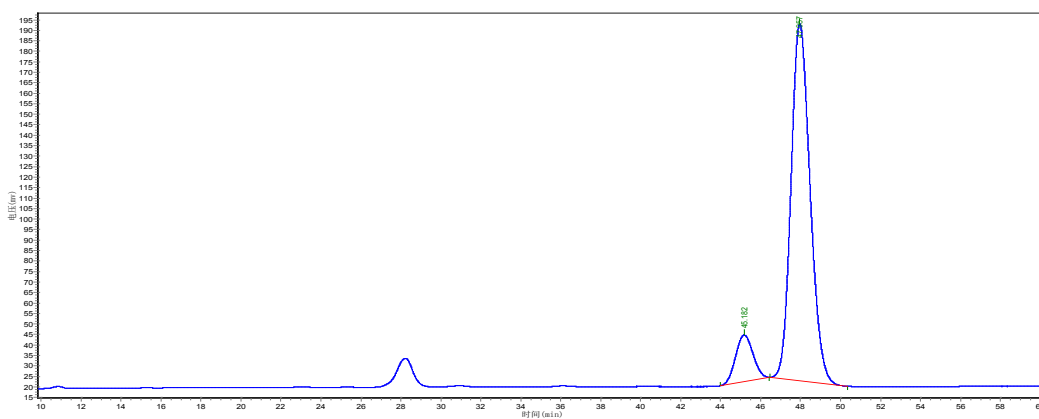

Result Table

| Peak# | Ret. Time/min | Height/ $\mu$ V | Area/ $\mu$ V's | Area%    |
|-------|---------------|-----------------|-----------------|----------|
| 1     | 45.182        | 22255.029       | 1347499.375     | 10.6944  |
| 2     | 47.957        | 170169.313      | 11252524.000    | 89.3056  |
| total |               | 192424.342      | 12600023.375    | 100.0000 |

79 % ee. The ee of the product was determined by HPLC using an AD-H column (n-Hexane / i-PrOH = 80/20, flow rate: 0.5 ml/min,  $\lambda$  = 210 nm,  $t_R$  = 45.2 min (minor) and  $t_R$  = 48.0 min (major).

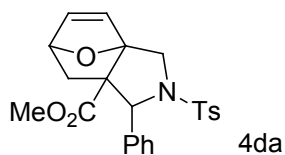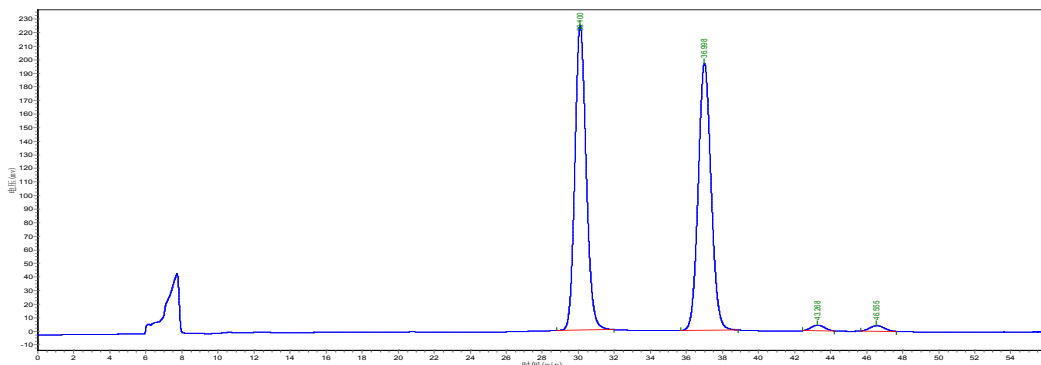

Result Table

| Peak# | Ret. Time/min | Height/ $\mu$ V | Area/ $\mu$ V·s | Area%    |
|-------|---------------|-----------------|-----------------|----------|
| 1     | 30.100        | 224475.453      | 9761292.000     | 48.8656  |
| 2     | 36.998        | 196715.766      | 9773942.000     | 48.9289  |
| 3     | 43.268        | 4145.165        | 213888.891      | 1.0707   |
| 4     | 46.555        | 4099.804        | 226685.203      | 1.1348   |
| total |               | 429436.188      | 19975808.094    | 100.0000 |

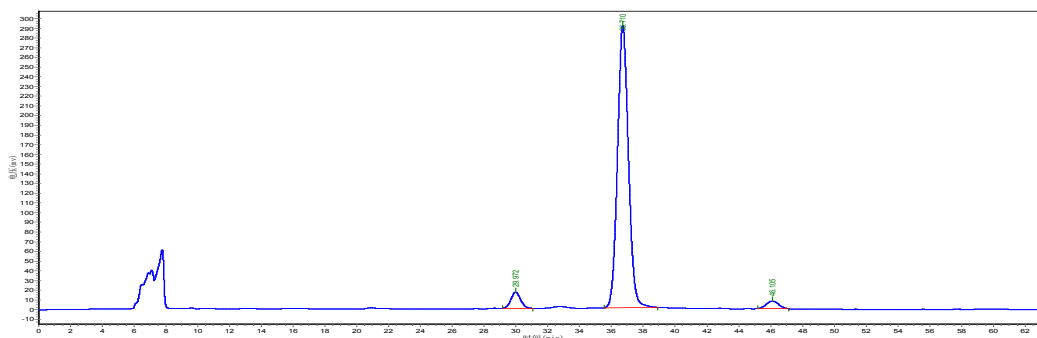

Result Table

| Peak# | Ret. Time/min | Height/ $\mu$ V | Area/ $\mu$ V·s | Area%    |
|-------|---------------|-----------------|-----------------|----------|
| 1     | 29.972        | 16721.637       | 701972.500      | 4.6784   |
| 2     | 36.710        | 290777.656      | 13876680.000    | 92.4830  |
| 3     | 46.105        | 7802.701        | 425918.031      | 2.8386   |
| total |               | 315301.994      | 15004570.531    | 100.0000 |

90 % ee. The ee of the product was determined by HPLC using an AD-H column (n-Hexane / i-PrOH = 80/20, flow rate: 0.5 ml/min,  $\lambda$  = 210 nm, major diastereomer:  $t_R$  = 30.0 min (minor) and  $t_R$  = 36.7 min (major); minor diastereomer:  $t_R$  = 46.1 min (major)).

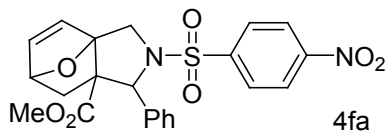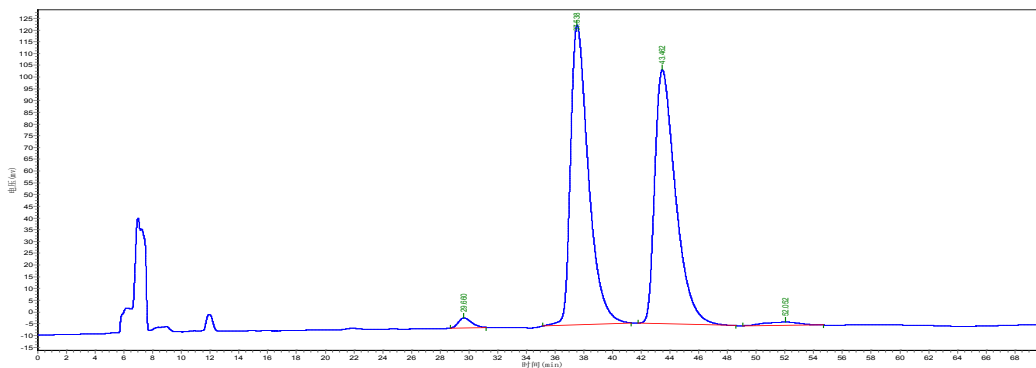

Result Table

| Peak# | Ret. Time/min | Height/ $\mu$ V | Area/ $\mu$ V·s | Area%    |
|-------|---------------|-----------------|-----------------|----------|
| 1     | 29.660        | 4213.453        | 266619.219      | 1.1923   |
| 2     | 37.538        | 127425.555      | 11010751.000    | 49.2391  |
| 3     | 43.462        | 108030.078      | 10845840.000    | 48.5016  |
| 4     | 52.052        | 1387.826        | 238592.203      | 1.0670   |
| total |               | 241056.912      | 22361802.422    | 100.0000 |

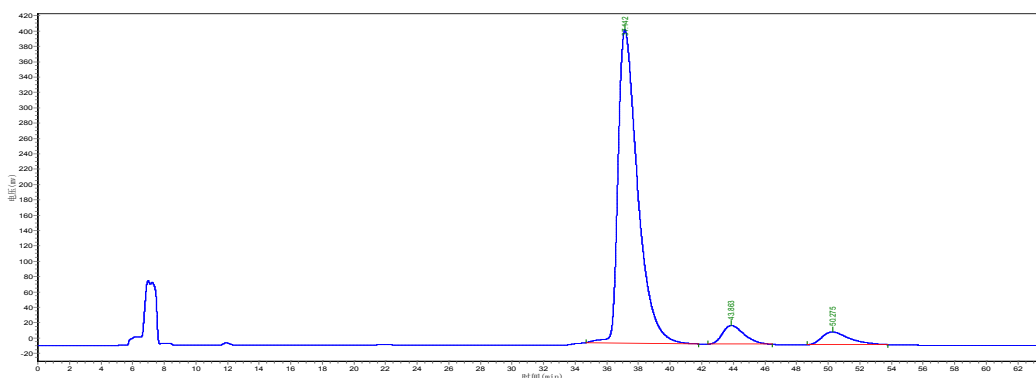

Result Table

| Peak# | Ret. Time/min | Height/ $\mu$ V | Area/ $\mu$ V·s | Area%    |
|-------|---------------|-----------------|-----------------|----------|
| 1     | 37.142        | 408497.094      | 34997016.000    | 88.9544  |
| 2     | 43.863        | 24291.643       | 2333555.000     | 5.9314   |
| 3     | 50.275        | 16680.131       | 2012056.000     | 5.1142   |
| total |               | 449468.867      | 39342627.000    | 100.0000 |

87 % ee. The ee of the product was determined by HPLC using an OD-H column (n-Hexane / i-PrOH = 80/20, flow rate: 0.5 ml/min,  $\lambda = 210$  nm, major diastereomer:  $t_R = 37.1$  min (major) and  $t_R = 43.9$  min (major); minor diastereomer:  $t_R = 50.3$  min (major)).

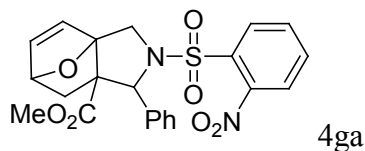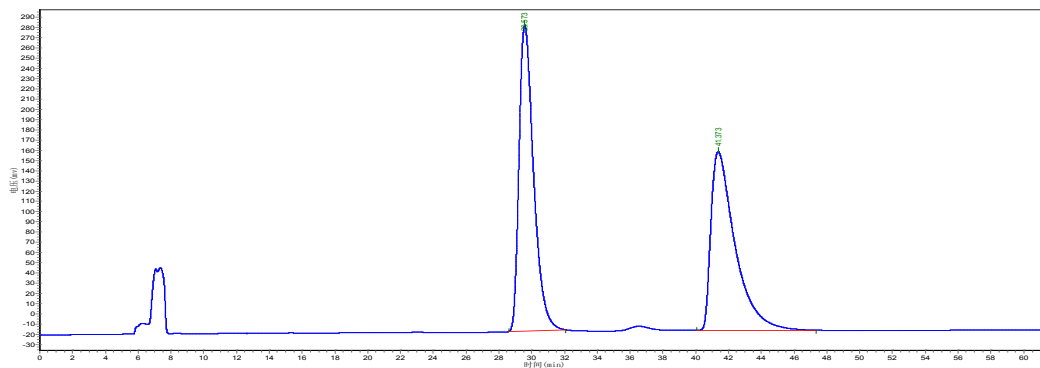

Result Table

| Peak# | Ret. Time/min | Height/ $\mu$ V | Area/ $\mu$ V·s | Area%    |
|-------|---------------|-----------------|-----------------|----------|
| 1     | 29.573        | 299217.594      | 18426690.000    | 50.8677  |
| 2     | 41.373        | 174693.813      | 17798062.000    | 49.1323  |
| total |               | 473911.406      | 36224752.000    | 100.0000 |

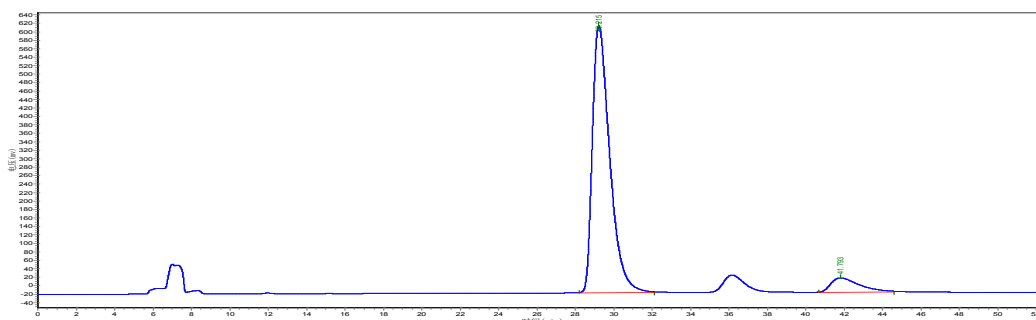

Result Table

| Peak# | Ret. Time/min | Height/ $\mu$ V | Area/ $\mu$ V·s | Area%    |
|-------|---------------|-----------------|-----------------|----------|
| 1     | 29.215        | 629436.125      | 39220368.000    | 92.3797  |
| 2     | 41.793        | 32800.453       | 3235267.750     | 7.6203   |
| total |               | 662236.578      | 42455635.750    | 100.0000 |

85 % ee. The ee of the product was determined by HPLC using an OD-H column (n-Hexane / i-PrOH = 80/20, flow rate: 0.5 ml/min,  $\lambda = 210$  nm,  $t_R = 29.2$  min (major) and  $t_R = 41.8$  min (minor)).

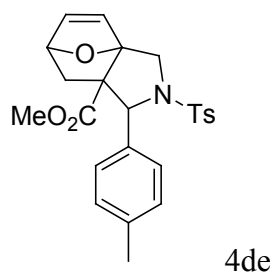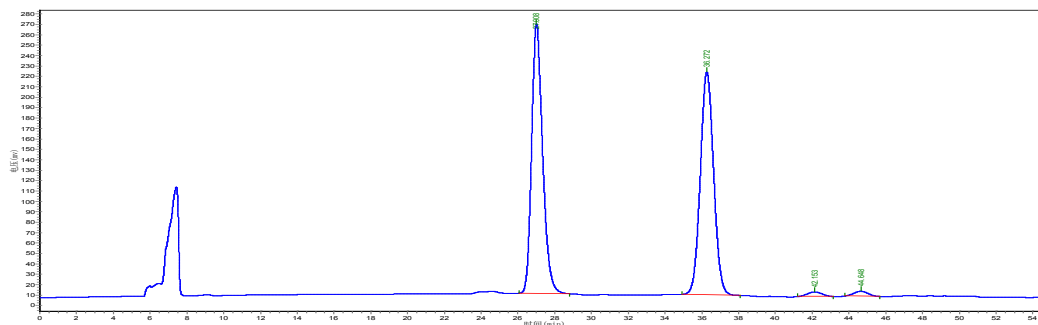

Result Table

| Peak# | Ret. Time/min | Height/ $\mu$ V | Area/ $\mu$ V·s | Area%    |
|-------|---------------|-----------------|-----------------|----------|
| 1     | 27.008        | 258501.453      | 10723273.000    | 48.7726  |
| 2     | 36.272        | 214068.125      | 10758660.000    | 48.9335  |
| 3     | 42.153        | 4482.442        | 248310.031      | 1.1294   |
| 4     | 44.648        | 4759.710        | 256029.219      | 1.1645   |
| total |               | 481811.730      | 21986272.250    | 100.0000 |

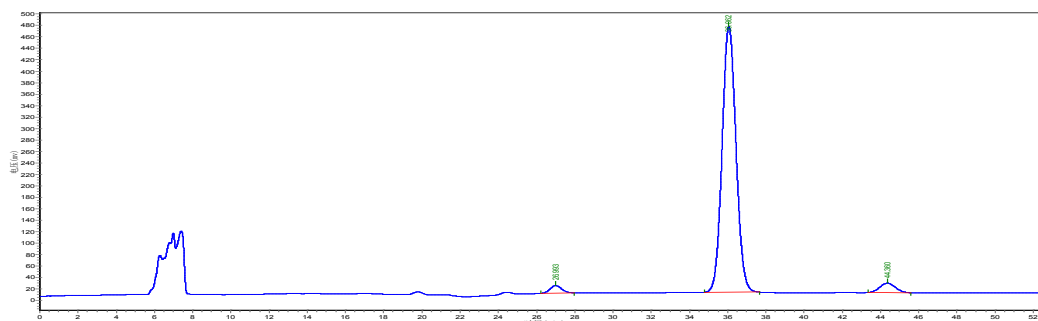

Result Table

| Peak# | Ret. Time/min | Height/ $\mu$ V | Area/ $\mu$ V·s | Area%    |
|-------|---------------|-----------------|-----------------|----------|
| 1     | 26.993        | 13086.258       | 550023.625      | 2.2093   |
| 2     | 36.062        | 463819.813      | 23418028.000    | 94.0623  |
| 3     | 44.360        | 16390.871       | 928247.625      | 3.7285   |
| total |               | 493296.941      | 24896299.250    | 100.0000 |

95 % ee. The ee of the product was determined by HPLC using an AD-H column (n-Hexane / i-PrOH = 80/20, flow rate: 0.5 ml/min,  $\lambda$  = 210 nm, major diastereomer:  $t_R$  = 27.0 min (minor) and  $t_R$  = 36.1 min (major); minor diastereomer:  $t_R$  = 44.4 min (major)).



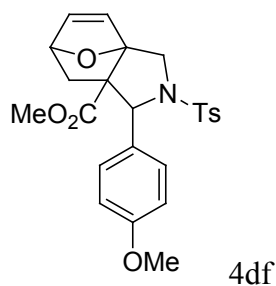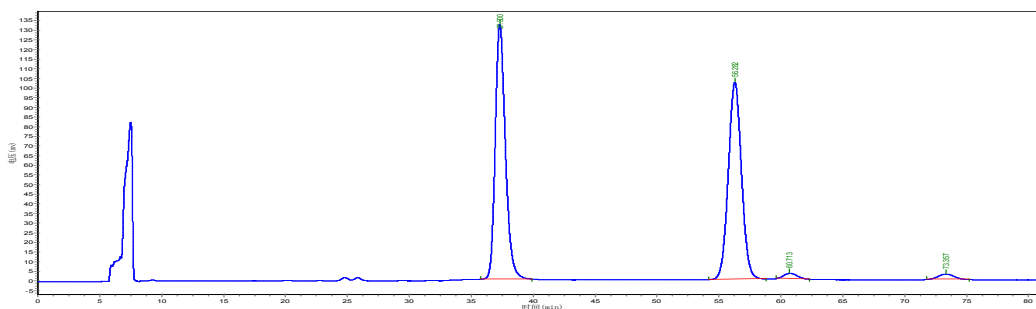

Result Table

| Peak# | Ret. Time/min | Height/ $\mu$ V | Area/ $\mu$ V·s | Area%    |
|-------|---------------|-----------------|-----------------|----------|
| 1     | 37.300        | 132017.641      | 7532526.000     | 48.3792  |
| 2     | 56.282        | 102076.305      | 7555149.500     | 48.5245  |
| 3     | 60.713        | 2912.635        | 221037.266      | 1.4197   |
| 4     | 73.357        | 2862.256        | 261049.281      | 1.6766   |
| total |               | 239868.836      | 15569762.047    | 100.0000 |

Result Table

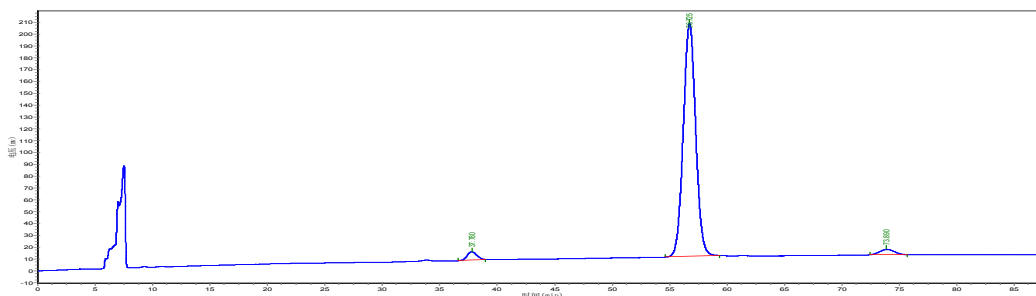

Result Table

| Peak# | Ret. Time/min | Height/ $\mu$ V | Area/ $\mu$ V·s | Area%    |
|-------|---------------|-----------------|-----------------|----------|
| 1     | 37.780        | 7094.938        | 406248.281      | 2.6130   |
| 2     | 56.725        | 196767.266      | 14738271.000    | 94.7969  |
| 3     | 73.890        | 4484.458        | 402686.406      | 2.5901   |
| 4     |               | 208346.662      | 15547205.688    | 100.0000 |

94 % ee. The ee of the product was determined by HPLC using an AD-H column (n-Hexane / i-PrOH = 80/20, flow rate: 0.5 ml/min,  $\lambda$  = 210 nm, major diastereomer:  $t_R$  = 37.8 min (minor) and  $t_R$  = 56.7 min (major); minor diastereomer:  $t_R$  = 73.9 min (major)).

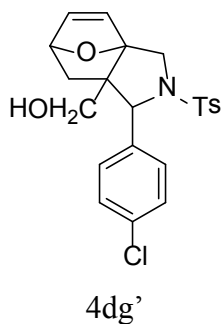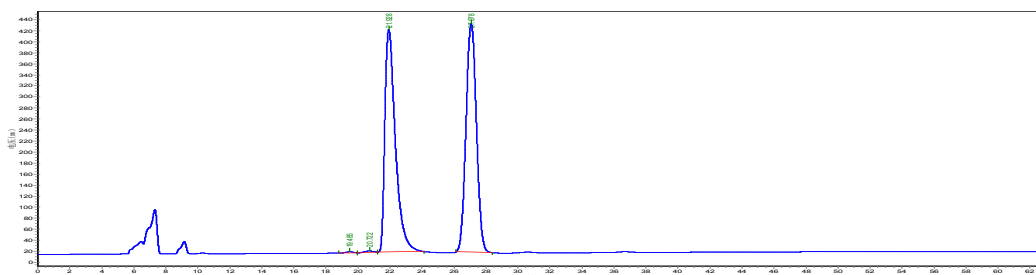

Result Table

| Peak# | Ret. Time/min | Height/ $\mu$ V | Area/ $\mu$ V·s | Area%    |
|-------|---------------|-----------------|-----------------|----------|
| 1     | 19.485        | 2112.966        | 66047.438       | 0.1766   |
| 2     | 20.722        | 2721.152        | 99710.469       | 0.2667   |
| 3     | 21.928        | 403420.156      | 18443324.000    | 49.3228  |
| 4     | 27.078        | 415135.719      | 18784038.000    | 50.2339  |
| total |               | 823389.993      | 3733119.906     | 100.0000 |

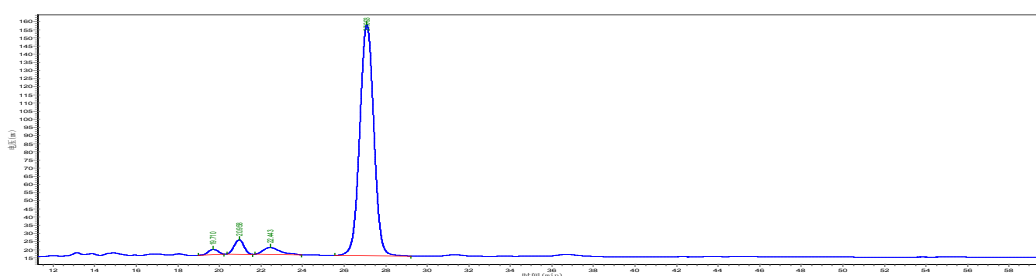

Result Table

| Peak# | Ret. Time/min | Height/ $\mu$ V | Area/ $\mu$ V·s | Area%    |
|-------|---------------|-----------------|-----------------|----------|
| 1     | 19.710        | 3094.359        | 102536.203      | 1.4100   |
| 2     | 20.958        | 8720.529        | 284160.594      | 3.9076   |
| 3     | 22.443        | 4277.871        | 242337.578      | 3.3325   |
| 4     | 27.093        | 141614.375      | 6642964.000     | 91.3499  |
| total |               | 157707.134      | 7271998.375     | 100.0000 |

93 % ee. The ee of the product was determined by HPLC using an AD-H column (n-Hexane / i-PrOH = 80/20, flow rate: 0.5 ml/min,  $\lambda$  = 210 nm, major diastereomer:  $t_R$  = 27.1 min (major) and  $t_R$  = 22.4 min (minor); minor diastereomer:  $t_R$  = 19.7 min (minor) and  $t_R$  = 21.0 min (major)).

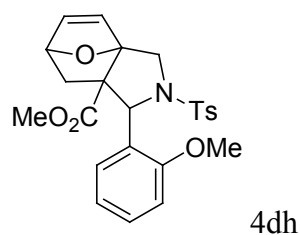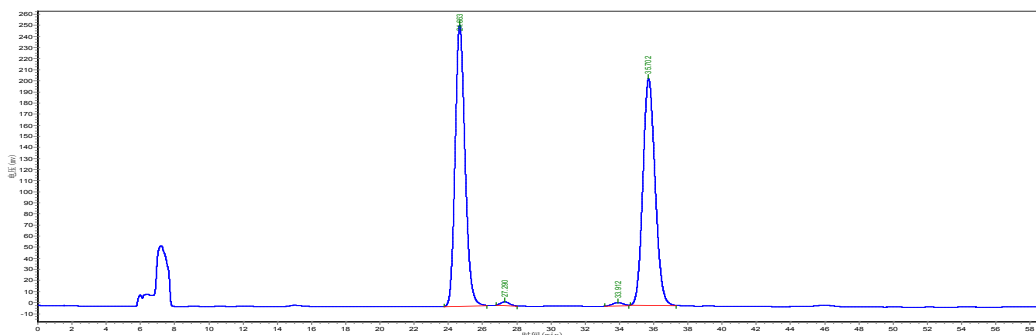

Result Table

| Peak# | Ret. Time/min | Height/ $\mu$ V | Area/ $\mu$ V·s | Area%    |
|-------|---------------|-----------------|-----------------|----------|
| 1     | 24.663        | 253327.984      | 10177489.000    | 49.6329  |
| 2     | 27.290        | 3184.516        | 114296.797      | 0.5574   |
| 3     | 33.912        | 2674.826        | 111681.203      | 0.5446   |
| 4     | 35.702        | 204266.109      | 10102049.000    | 49.2650  |
| total |               | 463453.436      | 20505516.000    | 100.0000 |

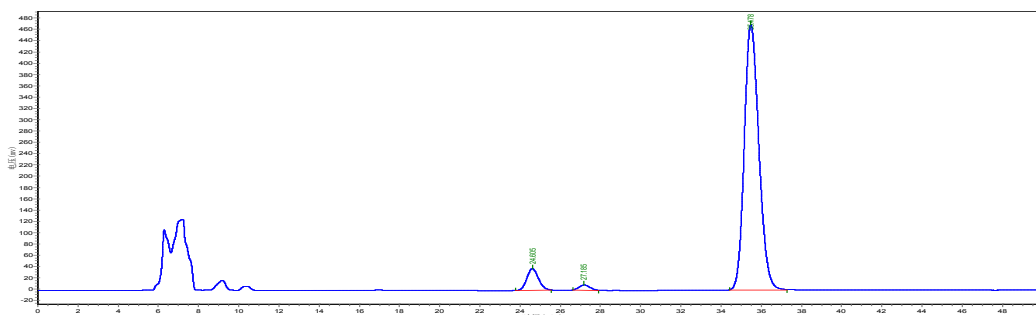

Result Table

| Peak# | Ret. Time/min | Height/ $\mu$ V | Area/ $\mu$ V·s | Area%    |
|-------|---------------|-----------------|-----------------|----------|
| 1     | 24.605        | 38109.066       | 1518231.000     | 5.9731   |
| 2     | 27.185        | 8802.259        | 323236.688      | 1.2717   |
| 3     | 35.478        | 469468.875      | 23576374.000    | 92.7552  |
| total |               | 516380.875      | 25417841.688    | 100.0000 |

88 % ee. The ee of the product was determined by HPLC using an AD-H column (n-Hexane / i-PrOH = 80/20, flow rate: 0.5 ml/min,  $\lambda$  = 210 nm, major diastereomer:  $t_R$  = 24.6 min (minor) and  $t_R$  = 35.5 min (major); minor diastereomer:  $t_R$  = 27.2 min (major)).

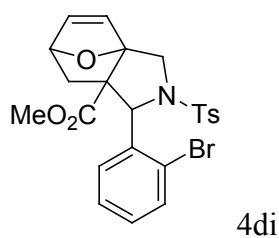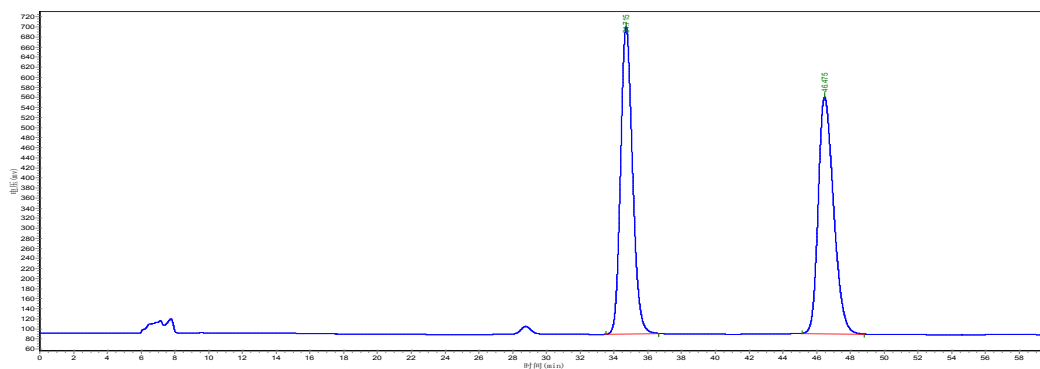

Result Table

| Peak# | Ret. Time/min | Height/ $\mu$ V | Area/ $\mu$ V·s | Area%    |
|-------|---------------|-----------------|-----------------|----------|
| 1     | 34.715        | 610399.938      | 29920894.000    | 50.2445  |
| 2     | 46.475        | 470414.875      | 29629650.000    | 49.7555  |
| total |               | 1080814.813     | 59550544.000    | 100.0000 |

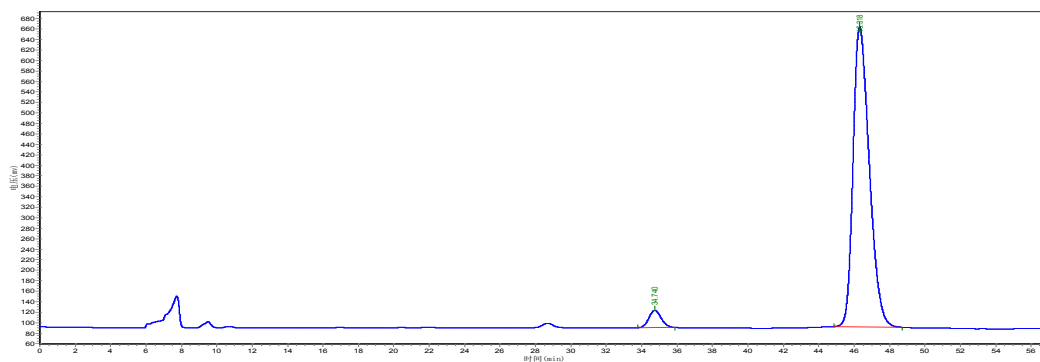

Result Table

| Peak# | Ret. Time/min | Height/ $\mu$ V | Area/ $\mu$ V·s | Area%    |
|-------|---------------|-----------------|-----------------|----------|
| 1     | 34.740        | 32734.779       | 1579884.375     | 4.1597   |
| 2     | 46.318        | 572155.875      | 36401096.000    | 95.8403  |
| total |               | 604890.654      | 37980980.375    | 100.0000 |

91 % ee. The ee of the product was determined by HPLC using an AD-H column (n-Hexane / i-PrOH = 80/20, flow rate: 0.5 ml/min,  $\lambda$  = 210 nm,  $t_R$  = 34.7 min (minor) and  $t_R$  = 46.3 min (major)).

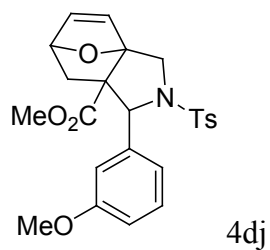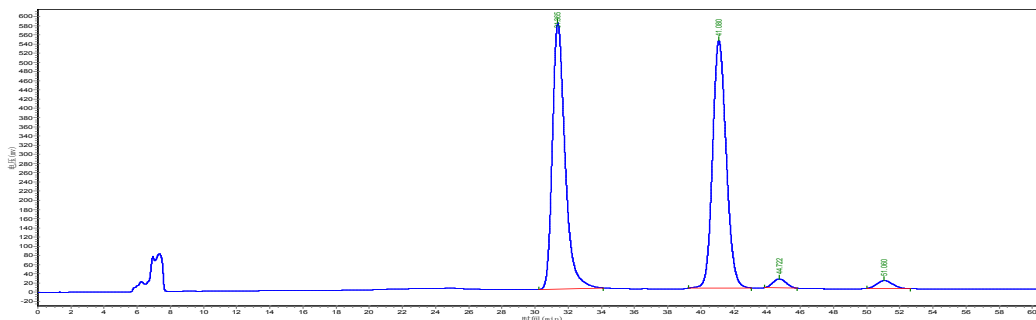

Result Table

| Peak# | Ret. Time/min | Height/ $\mu$ V | Area/ $\mu$ V·s | Area%    |
|-------|---------------|-----------------|-----------------|----------|
| 1     | 31.365        | 578819.938      | 30616952.000    | 48.2379  |
| 2     | 41.080        | 538235.125      | 30640518.000    | 48.2750  |
| 3     | 44.722        | 19419.924       | 1081257.375     | 1.7036   |
| 4     | 51.060        | 17128.479       | 1132018.750     | 1.7835   |
| total |               | 1153603.465     | 63470746.125    | 100.0000 |

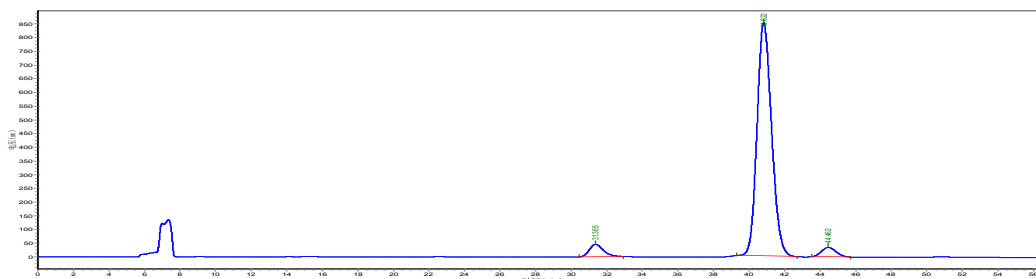

Result Table

| Peak# | Ret. Time/min | Height/ $\mu$ V | Area/ $\mu$ V·s | Area%    |
|-------|---------------|-----------------|-----------------|----------|
| 1     | 31.365        | 45572.168       | 2497960.000     | 4.7241   |
| 2     | 40.822        | 850890.875      | 48434696.000    | 91.5996  |
| 3     | 44.462        | 34233.177       | 1943899.750     | 3.6763   |
| total |               | 930696.160      | 52876555.750    | 100.0000 |

90 % ee. The ee of the product was determined by HPLC using an AD-H column (n-Hexane / i-PrOH = 80/20, flow rate: 0.5 ml/min,  $\lambda$  = 210 nm, major diastereomer:  $t_R$  = 31.4 min (minor) and  $t_R$  = 40.8 min (major); minor diastereomer:  $t_R$  = 44.5 min (major)).

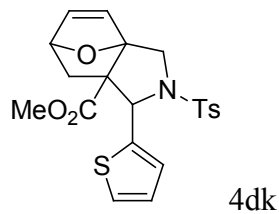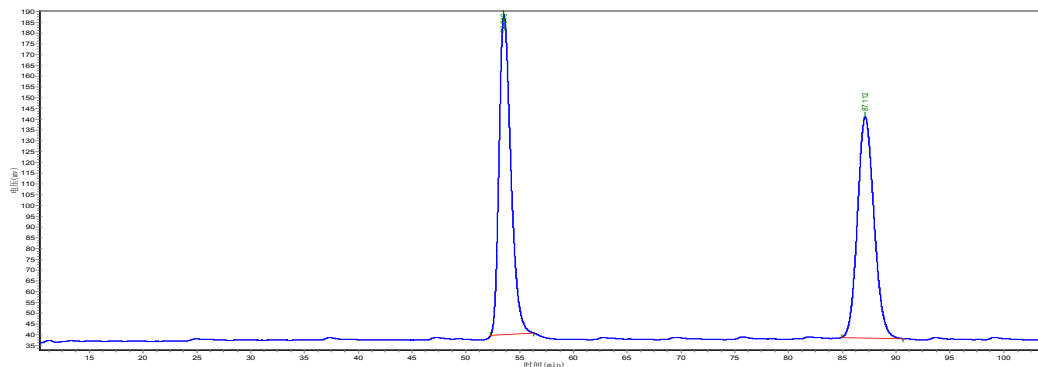

Result Table

| Peak# | Ret. Time/min | Height/ $\mu$ V | Area/ $\mu$ V·s | Area%   |
|-------|---------------|-----------------|-----------------|---------|
| 1     | 53.540        | 148364.063      | 11283139.000    | 50.7498 |
| 2     | 87.112        | 102508.305      | 10949733.000    | 49.2502 |
| total |               | 250872.367      | 22232872.000    | 100.000 |

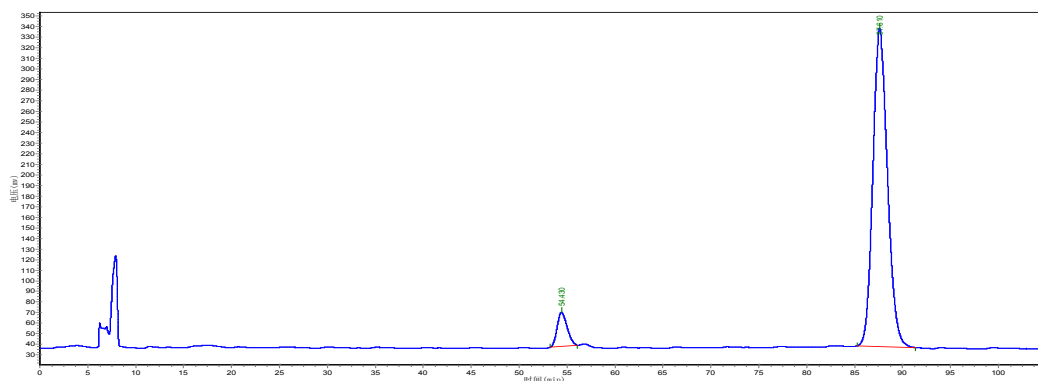

Result Table

| Peak# | Ret. Time/min | Height/ $\mu$ V | Area/ $\mu$ V·s | Area%    |
|-------|---------------|-----------------|-----------------|----------|
| 1     | 54.430        | 32077.158       | 2317846.750     | 6.8096   |
| 2     | 87.610        | 300495.281      | 31720076.000    | 93.1904  |
| total |               | 332572.439      | 34037922.750    | 100.0000 |

86 % ee. The ee of the product was determined by HPLC using an AD-H column (n-Hexane / i-PrOH = 90/10, flow rate: 0.5 ml/min,  $\lambda$  = 210 nm,  $t_R$  = 54.4 min (minor) and  $t_R$  = 87.6 min (major)).

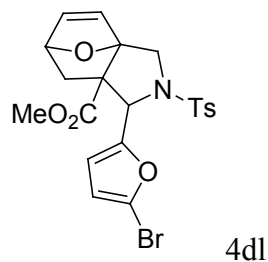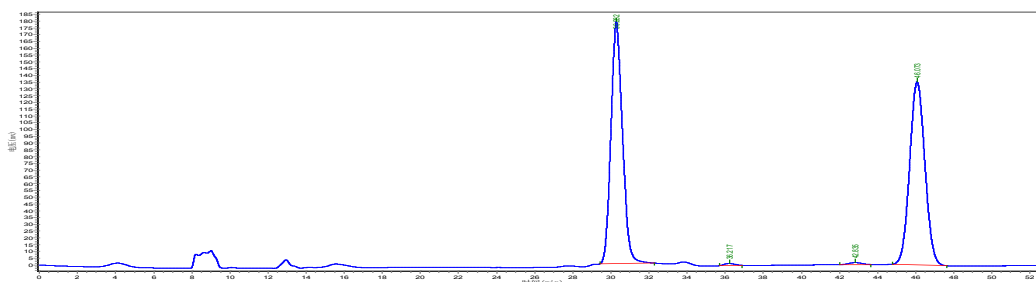

Result Table

| Peak# | Ret. Time/min | Height/ $\mu$ V | Area/ $\mu$ V·s | Area%    |
|-------|---------------|-----------------|-----------------|----------|
| 1     | 30.282        | 178655.906      | 7489916.000     | 49.5436  |
| 2     | 36.217        | 1543.372        | 58134.750       | 0.3845   |
| 3     | 42.835        | 1474.556        | 69844.195       | 0.4620   |
| 4     | 46.073        | 135068.125      | 7499939.500     | 49.6099  |
| total |               | 316741.959      | 15117834.445    | 100.0000 |

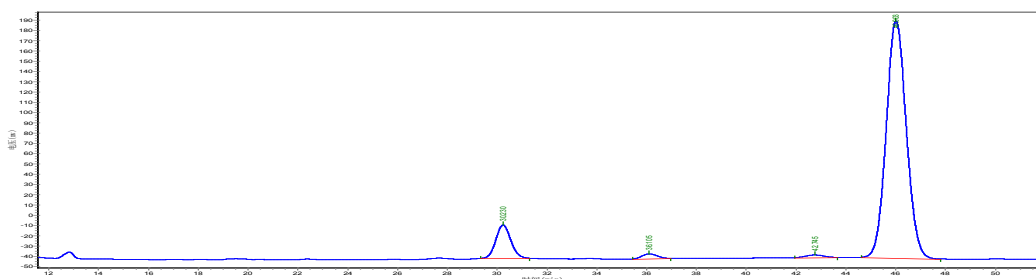

Result Table

| Peak# | Ret. Time/min | Height/ $\mu$ V | Area/ $\mu$ V·s | Area%    |
|-------|---------------|-----------------|-----------------|----------|
| 1     | 30.230        | 32380.061       | 1344509.250     | 9.2305   |
| 2     | 36.105        | 4739.546        | 197958.500      | 1.3590   |
| 3     | 42.745        | 2483.156        | 121434.477      | 0.8337   |
| 4     | 46.003        | 230777.391      | 12902113.000    | 88.5768  |
| total |               | 270380.154      | 14566015.227    | 100.0000 |

81 % ee. The ee of the product was determined by HPLC using an AD-H column (n-Hexane / i-PrOH = 80/20, flow rate: 0.5 ml/min,  $\lambda$  = 210 nm, major diastereomer:  $t_R$  = 30.2 min (minor) and  $t_R$  = 46.0 min (major); minor diastereomer:  $t_R$  = 36.1 min (major) and  $t_R$  = 42.7 min (minor)).



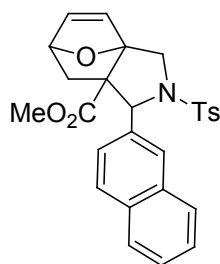

4dm

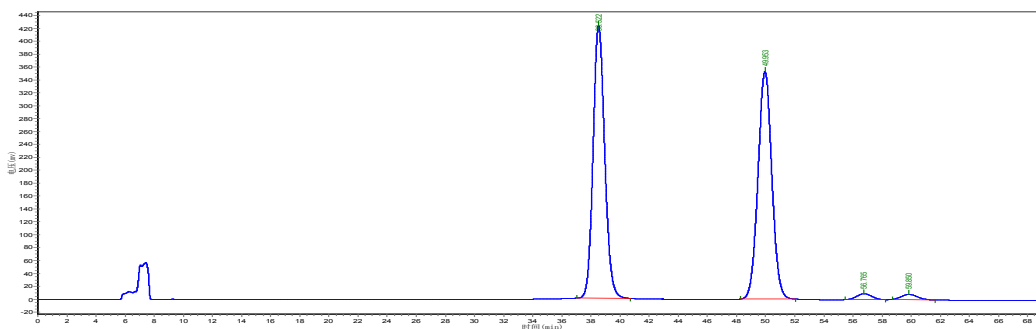

Result Table

| Peak# | Ret. Time/min | Height/ $\mu$ V | Area/ $\mu$ V·s | Area%    |
|-------|---------------|-----------------|-----------------|----------|
| 1     | 38.522        | 422599.250      | 23426912.000    | 48.8033  |
| 2     | 49.953        | 352864.875      | 23305530.000    | 48.5505  |
| 3     | 56.765        | 9136.372        | 659178.250      | 1.3732   |
| 4     | 59.850        | 8024.069        | 611074.188      | 1.2730   |
| total |               | 792624.069      | 48002694.438    | 100.0000 |

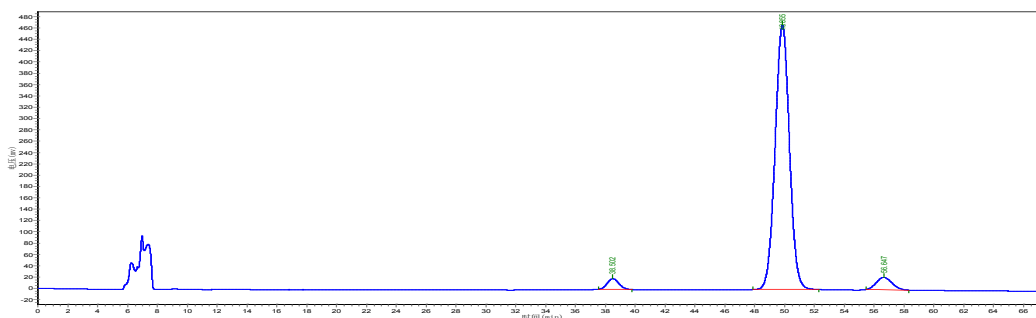

Result Table

| Peak# | Ret. Time/min | Height/ $\mu$ V | Area/ $\mu$ V·s | Area%    |
|-------|---------------|-----------------|-----------------|----------|
| 1     | 38.502        | 18786.201       | 1016015.938     | 3.0096   |
| 2     | 49.855        | 467070.719      | 31172042.000    | 92.3356  |
| 3     | 56.647        | 21705.254       | 1571458.750     | 4.6549   |
| total |               | 507562.174      | 33759516.688    | 100.0000 |

94 % ee. The ee of the product was determined by HPLC using an AD-H column (n-Hexane / i-PrOH = 80/20, flow rate: 0.5 ml/min,  $\lambda$  = 210 nm, major diastereomer:  $t_R$  = 38.5 min (minor) and  $t_R$  = 50.0 min (major); minor diastereomer:  $t_R$  = 56.6 min (major)).

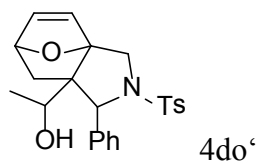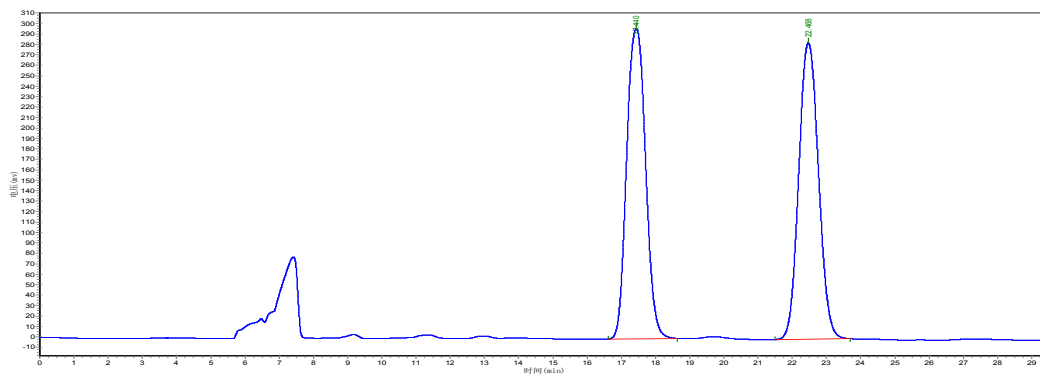

Result Table

| Peak# | Ret. Time/min | Height/ $\mu$ V | Area/ $\mu$ V·s | Area%    |
|-------|---------------|-----------------|-----------------|----------|
| 1     | 17.440        | 297114.000      | 11404918.000    | 50.0760  |
| 2     | 22.468        | 283792.656      | 11370318.000    | 49.9240  |
| total |               | 580906.656      | 22775236.000    | 100.0000 |

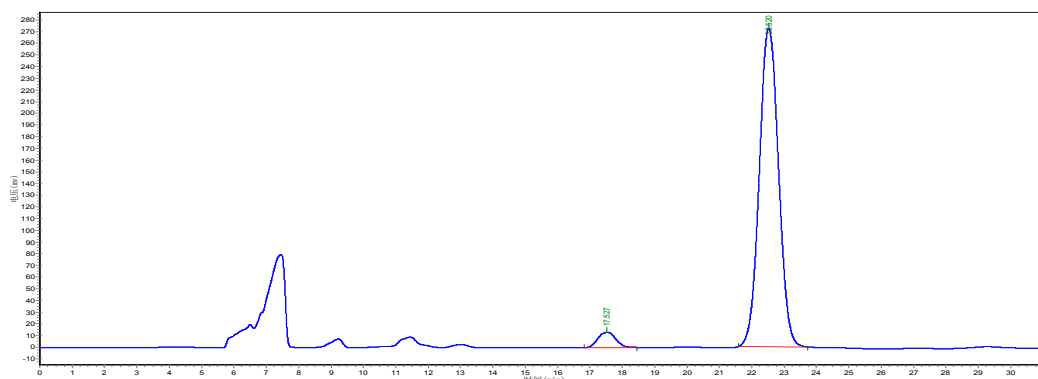

Result Table

| Peak# | Ret. Time/min | Height/ $\mu$ V | Area/ $\mu$ V·s | Area%    |
|-------|---------------|-----------------|-----------------|----------|
| 1     | 17.527        | 13095.306       | 500193.094      | 4.2651   |
| 2     | 22.520        | 272274.219      | 11227432.000    | 95.7349  |
| total |               | 285369.524      | 11727625.094    | 100.0000 |

91 % ee. The ee of the product was determined by HPLC using an AD-H column (n-Hexane / i-PrOH = 80/20, flow rate: 0.5 ml/min,  $\lambda$  = 210 nm,  $t_R$  = 17.5 min (minor) and  $t_R$  = 22.5 min (major).

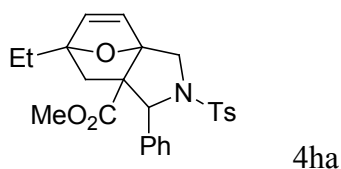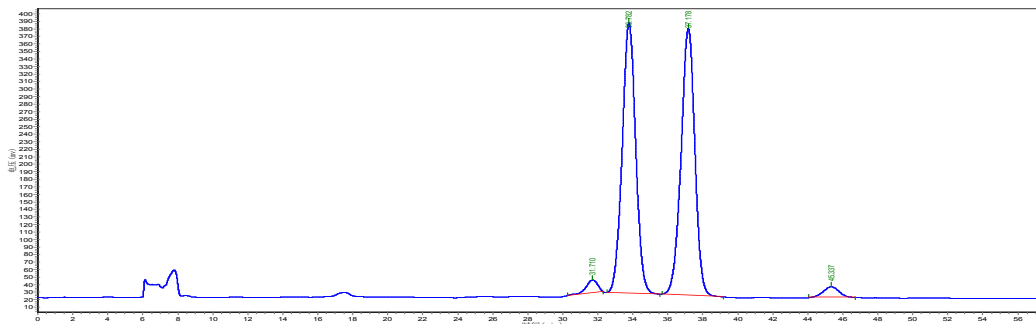

Result Table

| Peak# | Ret. Time/min | Height/ $\mu$ V | Area/ $\mu$ V·s | Area%    |
|-------|---------------|-----------------|-----------------|----------|
| 1     | 31.710        | 17012.391       | 783076.313      | 1.9390   |
| 2     | 33.782        | 359628.750      | 19255998.000    | 47.6802  |
| 3     | 37.178        | 354992.469      | 19433048.000    | 48.1186  |
| 4     | 45.337        | 14255.497       | 913584.625      | 2.2621   |
| total |               | 745889.106      | 40385706.938    | 100.0000 |

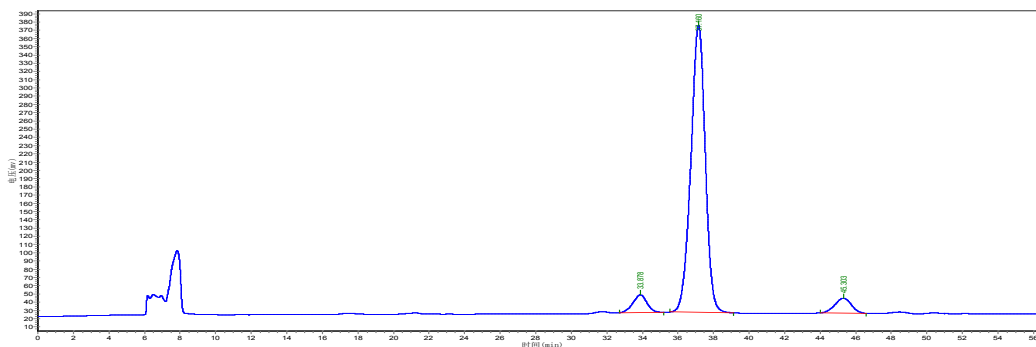

Result Table

| Peak# | Ret. Time/min | Height/ $\mu$ V | Area/ $\mu$ V·s | Area%    |
|-------|---------------|-----------------|-----------------|----------|
| 1     | 33.878        | 21337.295       | 1154179.750     | 5.2665   |
| 2     | 37.160        | 348337.438      | 19600382.000    | 89.4369  |
| 3     | 45.303        | 18176.340       | 1160754.625     | 5.2965   |
| total |               | 387851.072      | 21915316.375    | 100.0000 |

89 % ee. The ee of the product was determined by HPLC using an AD-H column (n-Hexane / i-PrOH = 90/10, flow rate: 0.5 ml/min,  $\lambda$  = 210 nm, major diastereomer:  $t_R$  = 33.9 min (minor) and  $t_R$  = 37.2 min (major); minor diastereomer:  $t_R$  = 45.3 min (major)).

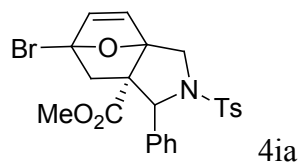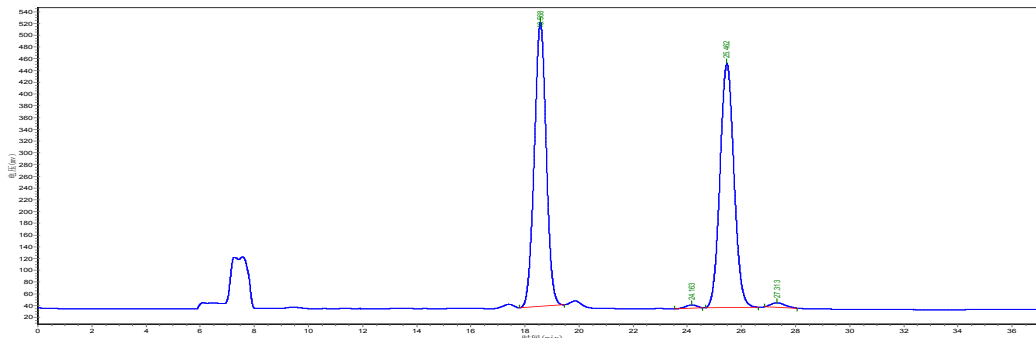

Result Table

| Peak# | Ret. Time/min | Height/ $\mu$ V | Area/ $\mu$ V·s | Area%    |
|-------|---------------|-----------------|-----------------|----------|
| 1     | 18.568        | 483812.250      | 14752231.000    | 49.0348  |
| 2     | 24.163        | 5627.479        | 166542.219      | 0.5536   |
| 3     | 25.462        | 415208.063      | 14897884.000    | 49.5190  |
| 4     | 27.313        | 7560.078        | 268557.563      | 0.8927   |
| total |               | 912207.870      | 30085214.781    | 100.0000 |

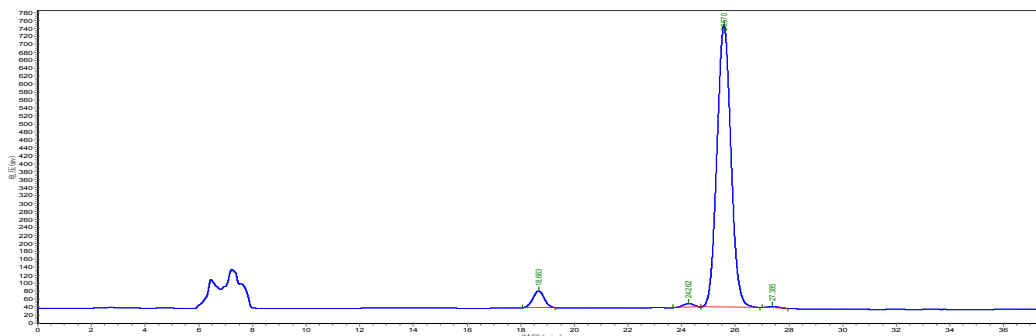

Result Table

| Peak# | Ret. Time/min | Height/ $\mu$ V | Area/ $\mu$ V·s | Area%    |
|-------|---------------|-----------------|-----------------|----------|
| 1     | 18.663        | 41877.977       | 1234057.375     | 4.5217   |
| 2     | 24.262        | 8924.072        | 263707.813      | 0.9662   |
| 3     | 25.570        | 708686.875      | 25689556.000    | 94.1287  |
| 4     | 27.385        | 3427.698        | 104617.617      | 0.3833   |
| total |               | 762916.622      | 27291938.805    | 100.0000 |

91 % ee. The ee of the product was determined by HPLC using an AD-H column (n-Hexane / i-PrOH = 80/20, flow rate: 0.5 ml/min,  $\lambda$  = 210 nm, major diastereomer:  $t_R$  = 18.7 min (minor) and  $t_R$  = 25.6 min (major); minor diastereomer:  $t_R$  = 24.3 min (major) and  $t_R$  = 27.4 min (minor)).

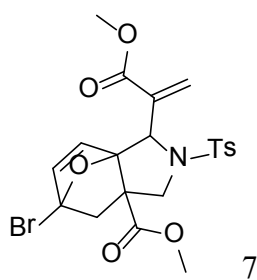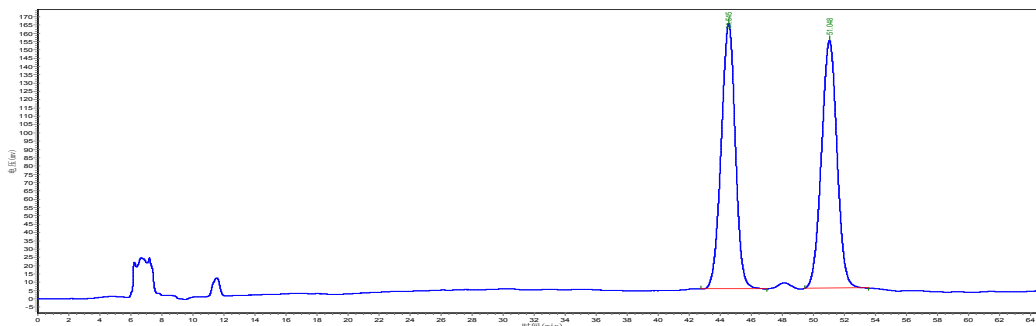

Result Table

| Peak# | Ret. Time/min | Height/ $\mu$ V | Area/ $\mu$ V's | Area%    |
|-------|---------------|-----------------|-----------------|----------|
| 1     | 44.545        | 159841.859      | 10143288.000    | 49.3813  |
| 2     | 51.048        | 149367.132      | 10397460.000    | 50.6187  |
| total |               | 309209.031      | 20540748.000    | 100.0000 |

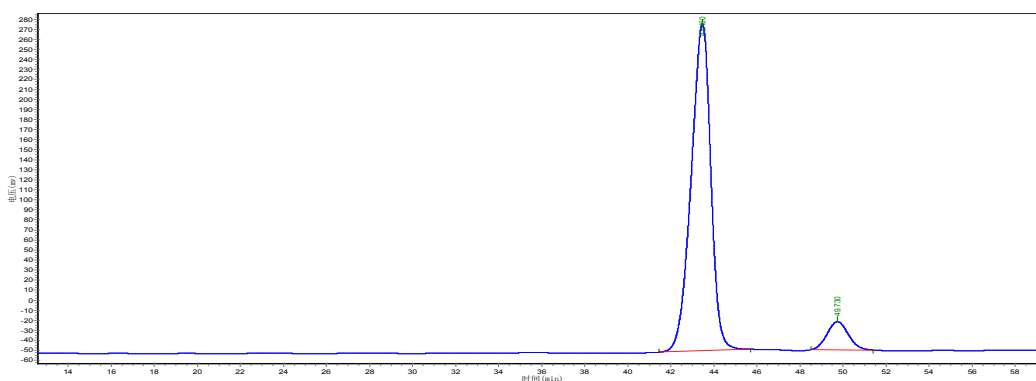

Result Table

| Peak# | Ret. Time/min | Height/ $\mu$ V | Area/ $\mu$ V's | Area%    |
|-------|---------------|-----------------|-----------------|----------|
| 1     | 43.460        | 325604.250      | 20670614.000    | 91.5229  |
| 2     | 49.730        | 28011.938       | 1914563.125     | 8.4771   |
| total |               | 353616.188      | 22585177.125    | 100.0000 |

-83 % ee. The ee of the product was determined by HPLC using an AD-H column (n-Hexane / i-PrOH = 90/10, flow rate 0.5 ml/min,  $\lambda$  = 210 nm,  $t_R$  = 43.5 min (major) and  $t_R$  = 49.7 min (minor).

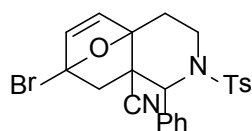

9

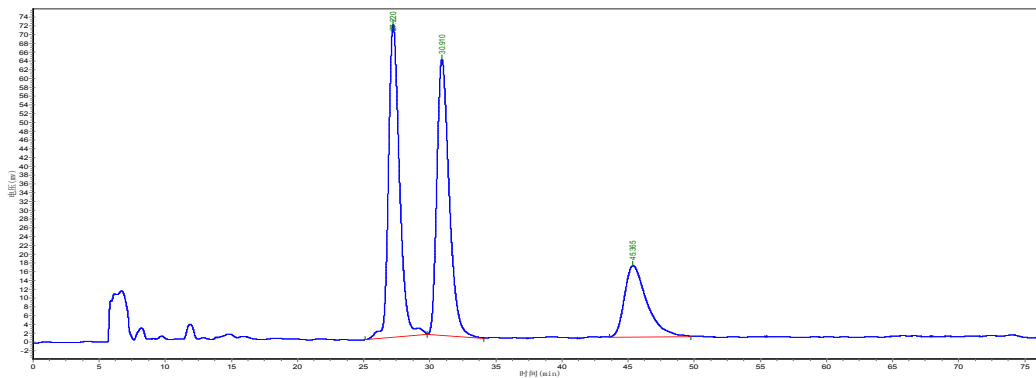

Result Table

| Peak# | Ret. Time/min | Height/ $\mu$ V | Area/ $\mu$ V·s | Area%    |
|-------|---------------|-----------------|-----------------|----------|
| 1     | 27.220        | 71196.828       | 4114852.250     | 41.0202  |
| 2     | 30.910        | 62805.309       | 4028233.750     | 40.1567  |
| 3     | 45.365        | 16216.535       | 1888201.375     | 18.8231  |
| total |               | 150218.672      | 10031287.375    | 100.0000 |

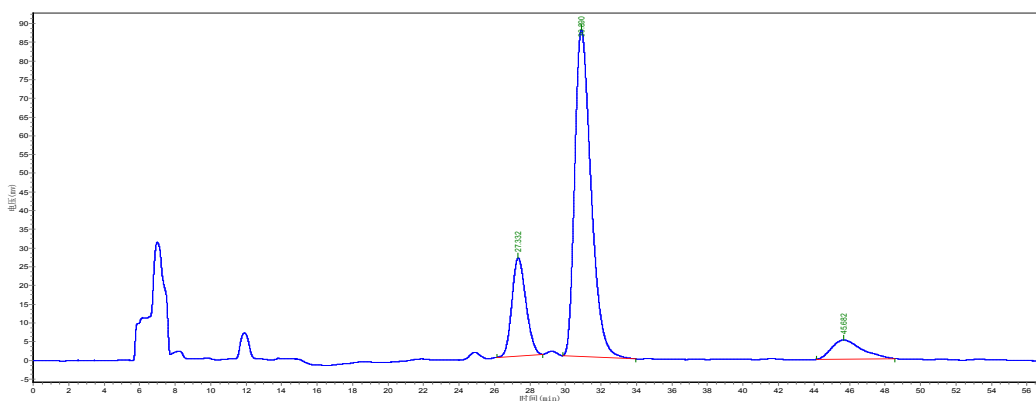

Result Table

| Peak# | Ret. Time/min | Height/ $\mu$ V | Area/ $\mu$ V·s | Area%    |
|-------|---------------|-----------------|-----------------|----------|
| 1     | 27.332        | 26144.596       | 1429539.250     | 18.8184  |
| 2     | 30.890        | 87343.570       | 5568706.000     | 73.3064  |
| 3     | 45.682        | 5067.264        | 598237.188      | 7.8752   |
| total |               | 118555.430      | 7596482.438     | 100.0000 |

59 % ee. The ee of the product was determined by HPLC using an OD-H column (n-Hexane / i-PrOH = 80/20, flow rate 0.5 ml/min,  $\lambda$  = 210 nm, major diastereomer:  $t_R$  = 27.3 min (minor) and  $t_R$  = 30.1 min (major). minor diastereomer:  $t_R$  = 45.7 min (the peaks of minor diastereomer are overlapped).

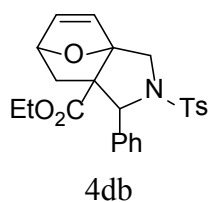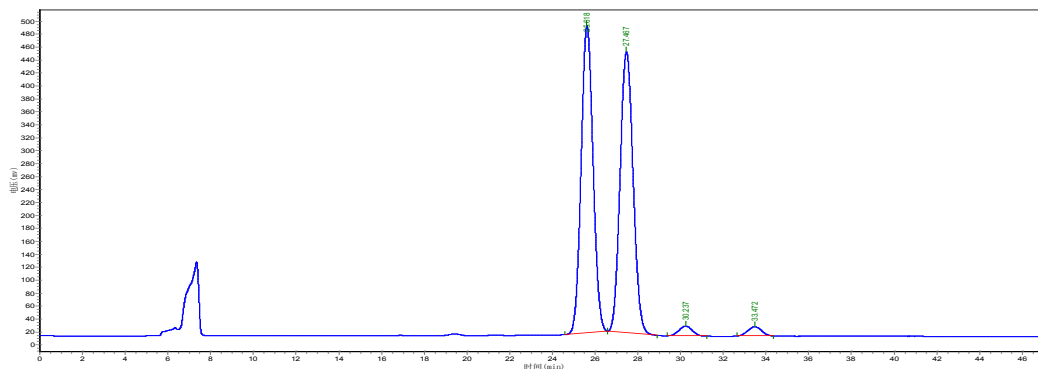

Result Table

| Peak# | Ret. Time/min | Height/ $\mu$ V | Area/ $\mu$ V·s | Area%    |
|-------|---------------|-----------------|-----------------|----------|
| 1     | 25.618        | 474526.219      | 18382238.000    | 48.2814  |
| 2     | 27.467        | 433443.406      | 18378514.000    | 48.2716  |
| 3     | 30.237        | 15385.043       | 663340.500      | 1.7423   |
| 4     | 33.472        | 14424.449       | 649025.688      | 1.7047   |
| total |               | 937779.117      | 38073118.188    | 100.0000 |

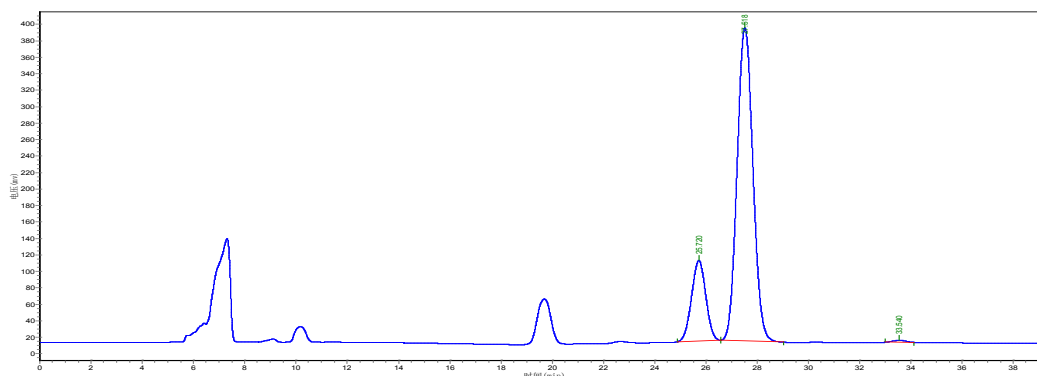

Result Table

| Peak# | Ret. Time/min | Height/ $\mu$ V | Area/ $\mu$ V·s | Area%    |
|-------|---------------|-----------------|-----------------|----------|
| 1     | 25.720        | 97901.484       | 3769689.750     | 18.6831  |
| 2     | 27.518        | 380256.375      | 16317654.000    | 80.8727  |
| 3     | 33.540        | 2395.879        | 89626.766       | 0.4442   |
| total |               | 480553.739      | 20176970.516    | 100.0000 |

62 % ee. The ee of the product was determined by HPLC using an AD-H column (n-Hexane / i-PrOH = 80/20, flow rate: 0.5 ml/min,  $\lambda$  = 210 nm, major diastereomer:  $t_R$  = 25.7 min (minor) and  $t_R$  = 27.5 min (major); minor diastereomer:  $t_R$  = 33.5 min (major)) .



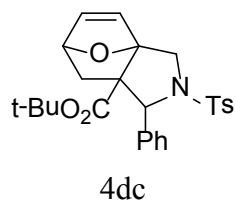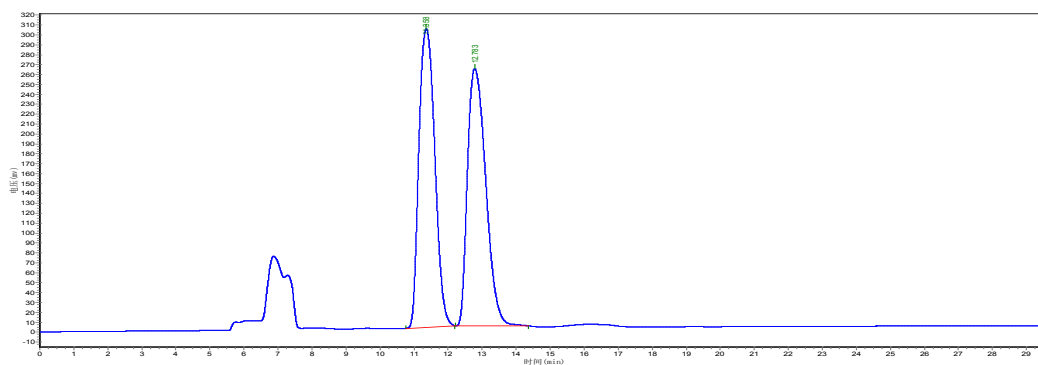

Result Table

| Peak# | Ret. Time/min | Height/ $\mu$ V | Area/ $\mu$ V·s | Area%    |
|-------|---------------|-----------------|-----------------|----------|
| 1     | 11.538        | 301177.906      | 9784586.000     | 50.1941  |
| 2     | 12.783        | 259598.828      | 9708902.000     | 49.8059  |
| total |               | 560776.734      | 19493488.000    | 100.0000 |

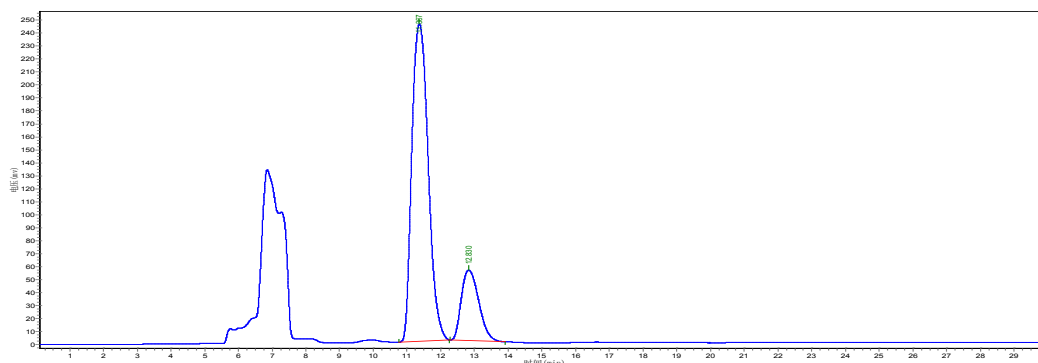

Result Table

| Peak# | Ret. Time/min | Height/ $\mu$ V | Area/ $\mu$ V·s | Area%    |
|-------|---------------|-----------------|-----------------|----------|
| 1     | 11.367        | 244207.453      | 8227607.000     | 80.7897  |
| 2     | 12.830        | 54377.145       | 1956376.000     | 19.2103  |
| total |               | 298584.598      | 10183983.000    | 100.0000 |

62 % ee. The ee of the product was determined by HPLC using an OD-H column (n-Hexane / i-PrOH = 80/20, flow rate: 0.5 ml/min,  $\lambda$  = 210 nm, major diastereomer:  $t_R$  = 11.4 min (major) and  $t_R$  = 12.8 min (minor).

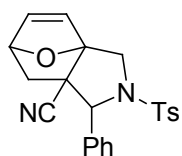

4dd (isomer A)

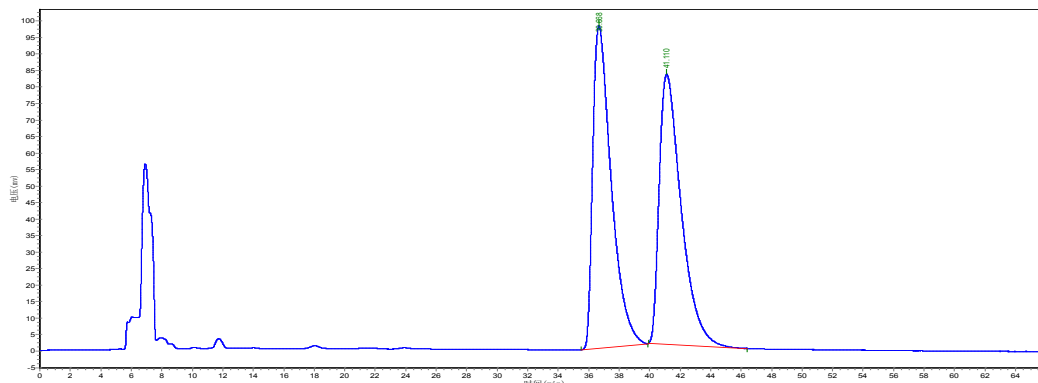

Result Table

| Peak# | Ret. Time/min | Height/ $\mu$ V | Area/ $\mu$ V·s | Area%    |
|-------|---------------|-----------------|-----------------|----------|
| 1     | 36.668        | 97655.555       | 8225971.000     | 50.2043  |
| 2     | 41.110        | 81767.148       | 8159028.000     | 49.7957  |
| total |               | 179422.703      | 16384999.000    | 100.0000 |

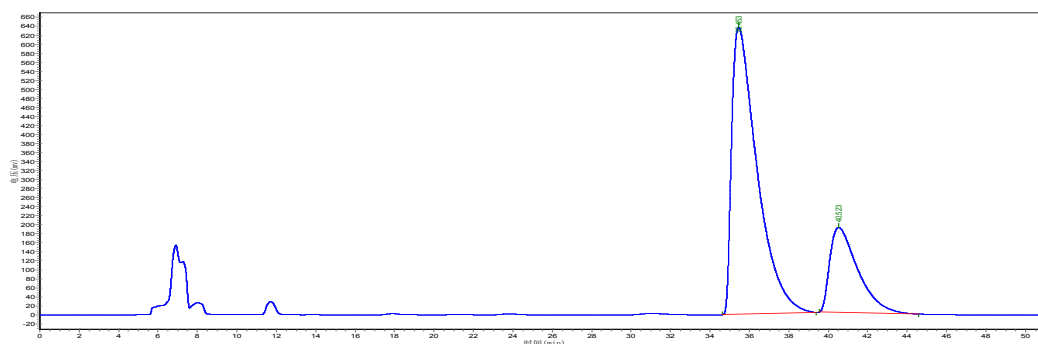

Result Table

| Peak# | Ret. Time/min | Height/ $\mu$ V | Area/ $\mu$ V·s | Area%    |
|-------|---------------|-----------------|-----------------|----------|
| 1     | 35.453        | 636859.875      | 56993408.000    | 75.3692  |
| 2     | 40.523        | 188398.703      | 18625568.000    | 24.6308  |
| total |               | 825258.578      | 75618976.000    | 100.0000 |

51 % ee. The ee of the product was determined by HPLC using an OD-H column (n-Hexane / i-PrOH = 80/20, flow rate: 0.5 ml/min,  $\lambda$  = 210 nm, major diastereomer:  $t_R$  = 35.5 min (major) and  $t_R$  = 40.5 min (minor)).

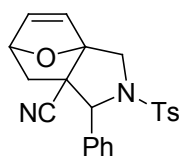

4dd (isomer B)

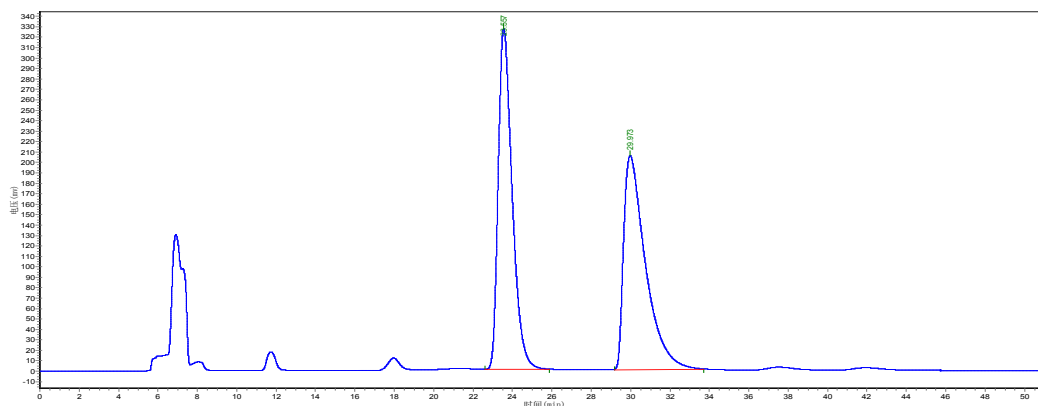

Result Table

| Peak# | Ret. Time/min | Height/ $\mu$ V | Area/ $\mu$ V·s | Area%    |
|-------|---------------|-----------------|-----------------|----------|
| 1     | 23.557        | 326284.188      | 16041656.000    | 50.5284  |
| 2     | 29.973        | 204694.266      | 15706119.000    | 49.4716  |
| total |               | 530978.453      | 31747775.000    | 100.0000 |

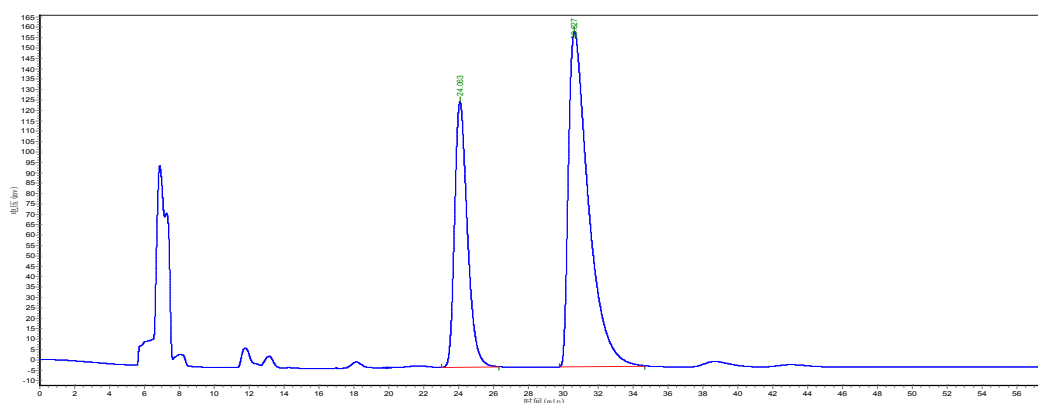

Result Table

| Peak# | Ret. Time/min | Height/ $\mu$ V | Area/ $\mu$ V·s | Area%    |
|-------|---------------|-----------------|-----------------|----------|
| 1     | 24.063        | 127796.508      | 6464587.000     | 33.6380  |
| 2     | 30.627        | 161091.859      | 12753523.000    | 66.3620  |
| total |               | 288888.367      | 19218110.000    | 100.0000 |

33 % ee. The ee of the product was determined by HPLC using an OD-H column (n-Hexane / i-PrOH = 80/20, flow rate: 0.5 ml/min,  $\lambda$  = 210 nm, major diastereomer:  $t_R$  = 24.0 min (minor) and  $t_R$  = 30.6 min (major)).

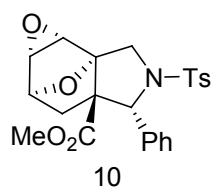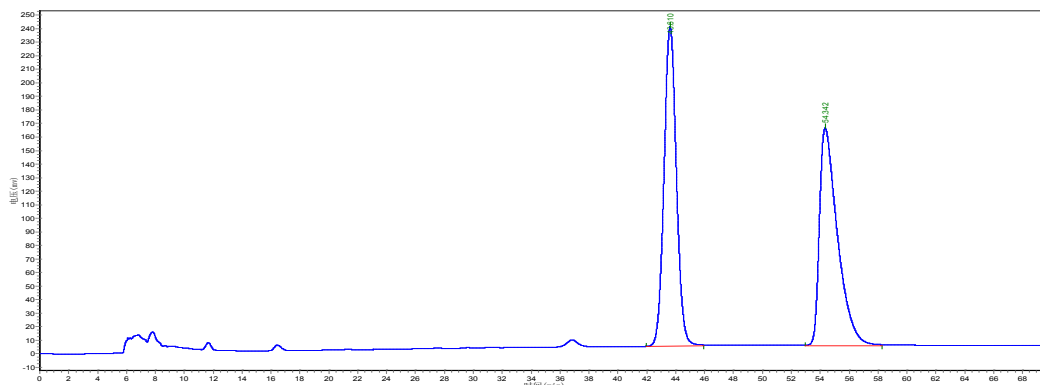

| Peak# | Ret. Time/min | Height/ $\mu\text{V}$ | Area/ $\mu\text{V}\cdot\text{s}$ | Area%    |
|-------|---------------|-----------------------|----------------------------------|----------|
| 1     | 43.610        | 235477.750            | 13945985.000                     | 50.3629  |
| 2     | 54.342        | 160254.109            | 13744978.000                     | 49.6371  |
| total |               | 395731.859            | 27690963.000                     | 100.0000 |

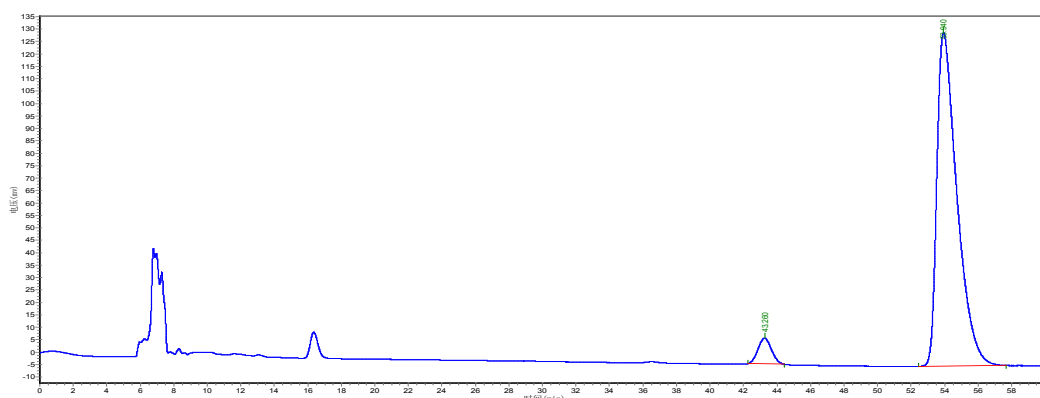

| Peak# | Ret. Time/min | Height/ $\mu\text{V}$ | Area/ $\mu\text{V}\cdot\text{s}$ | Area%    |
|-------|---------------|-----------------------|----------------------------------|----------|
| 1     | 43.260        | 10379.087             | 581593.125                       | 4.9692   |
| 2     | 53.940        | 134120.984            | 11122454.000                     | 95.0308  |
| total |               | 144500.071            | 11704047.125                     | 100.0000 |

90 % ee. The ee of the product was determined by HPLC using an AD-H column (n-Hexane / i-PrOH = 70/30, flow rate 0.5 ml/min,  $\lambda = 210$  nm,  $t_R = 43.3$  min (minor) and  $t_R = 53.9$  min (major).

**SI**

**Spectra of NMR:**

Spectra-41

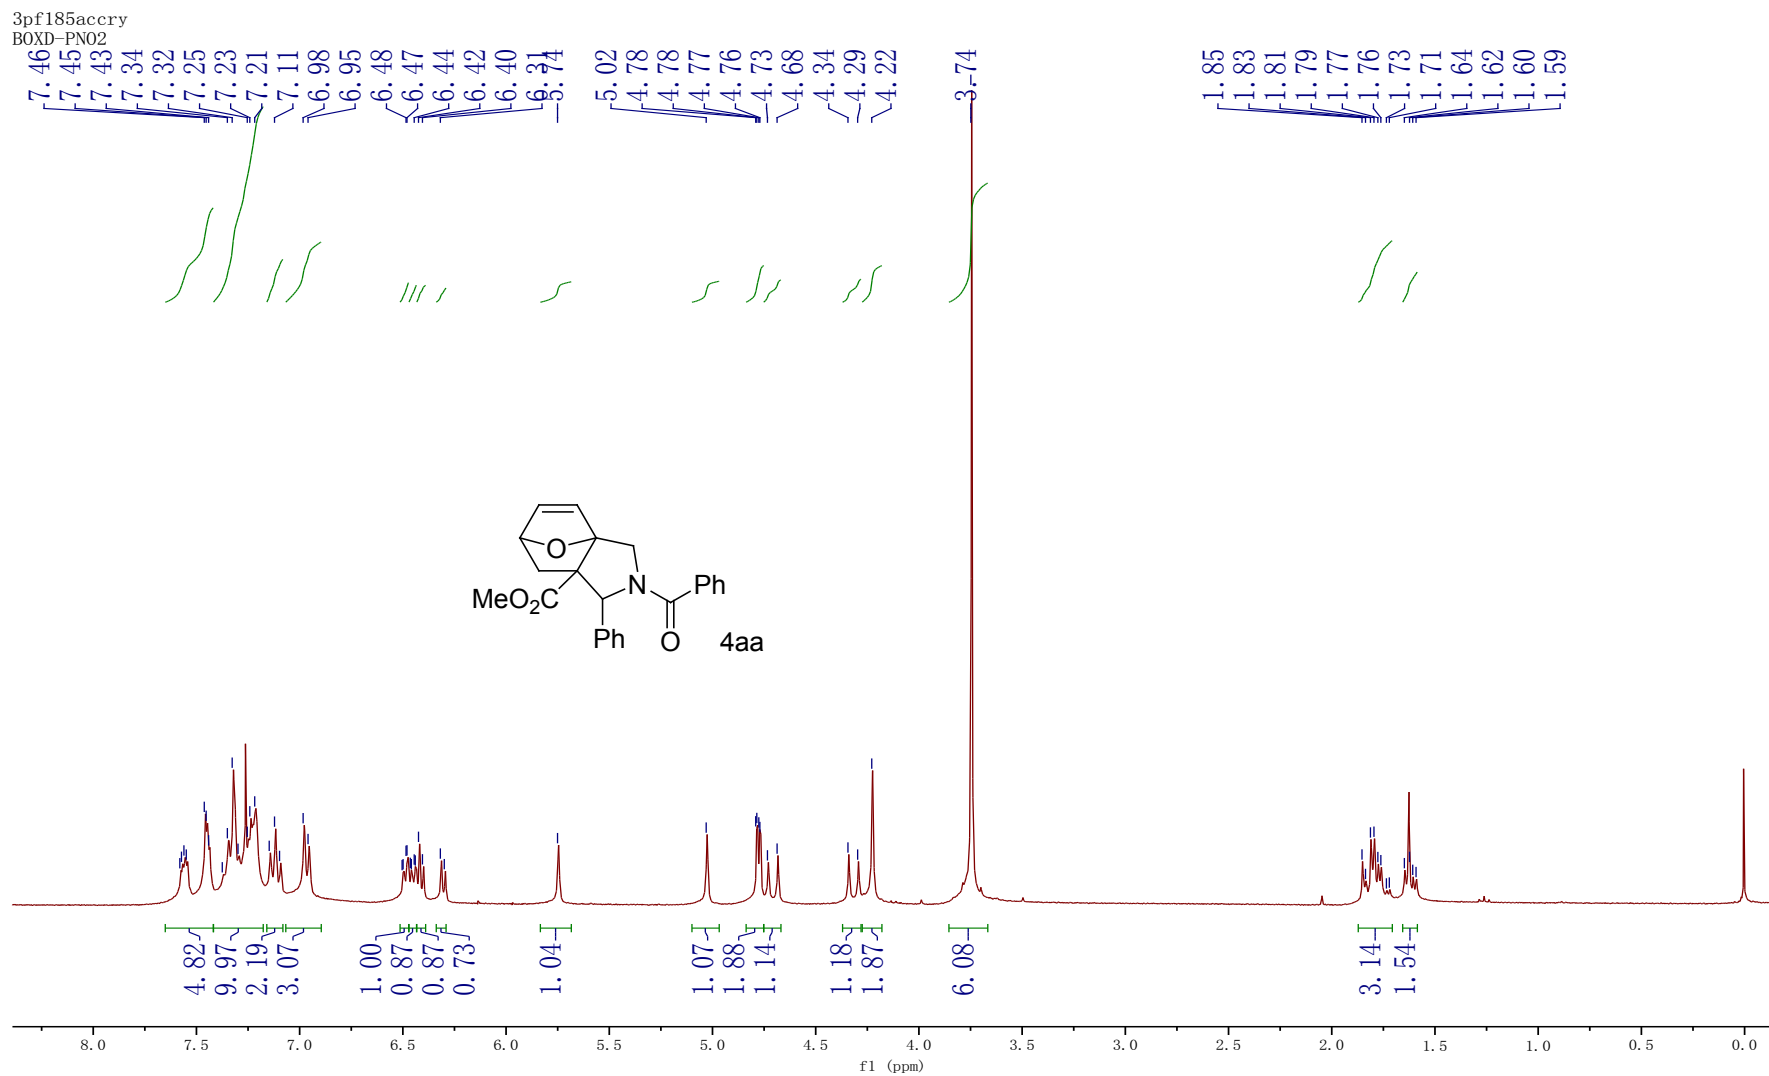

Spectra-42

4pf137ab

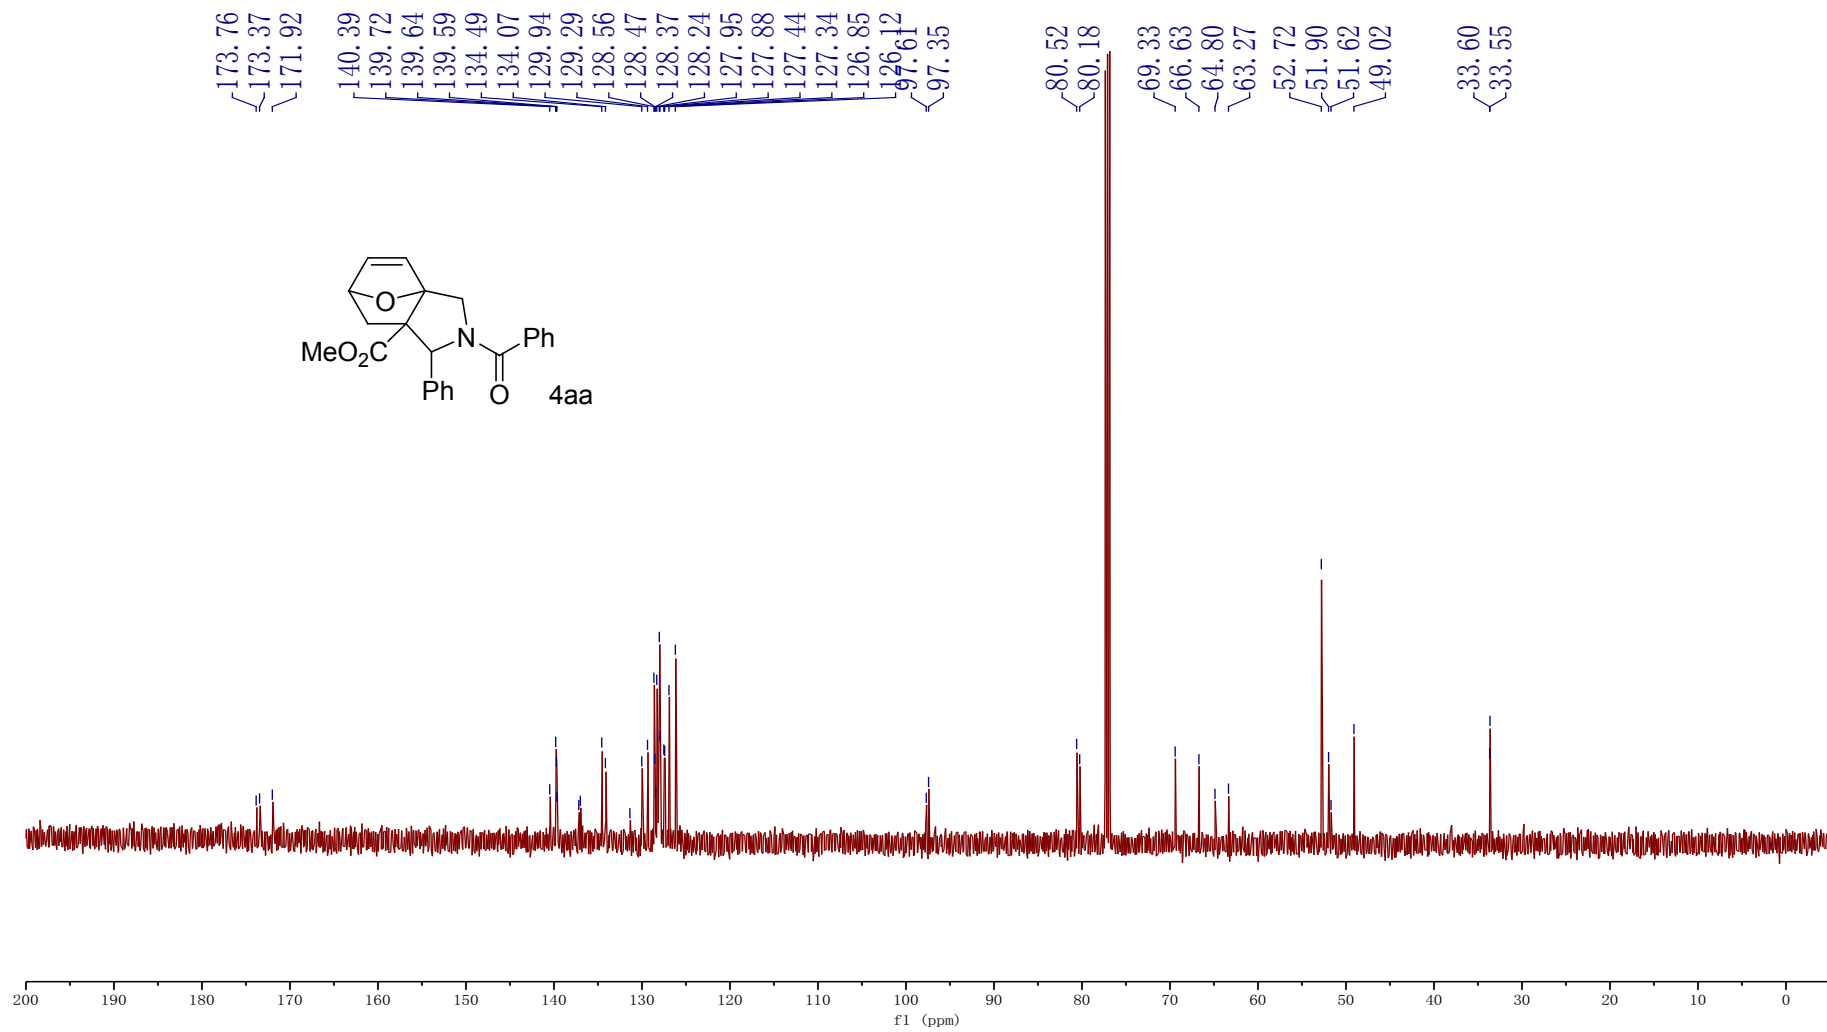

Spectra-43

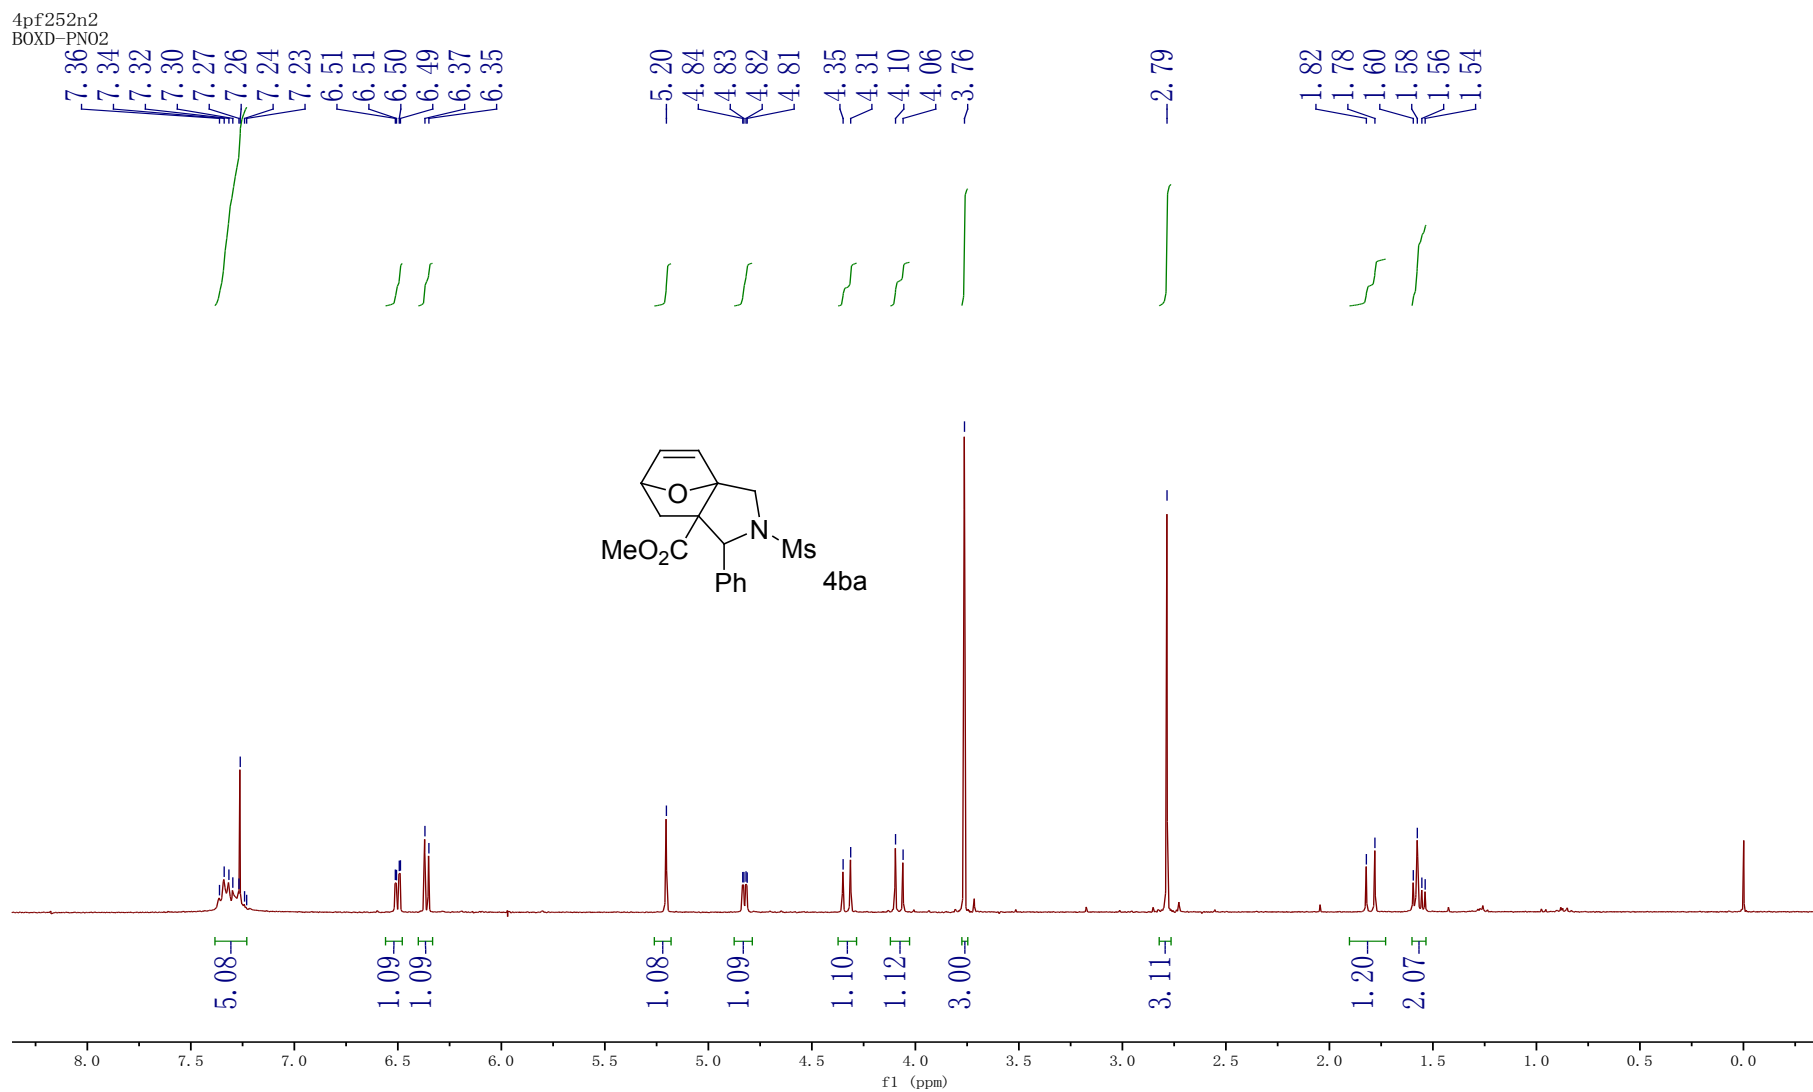

Spectra-44



4pf252n-c

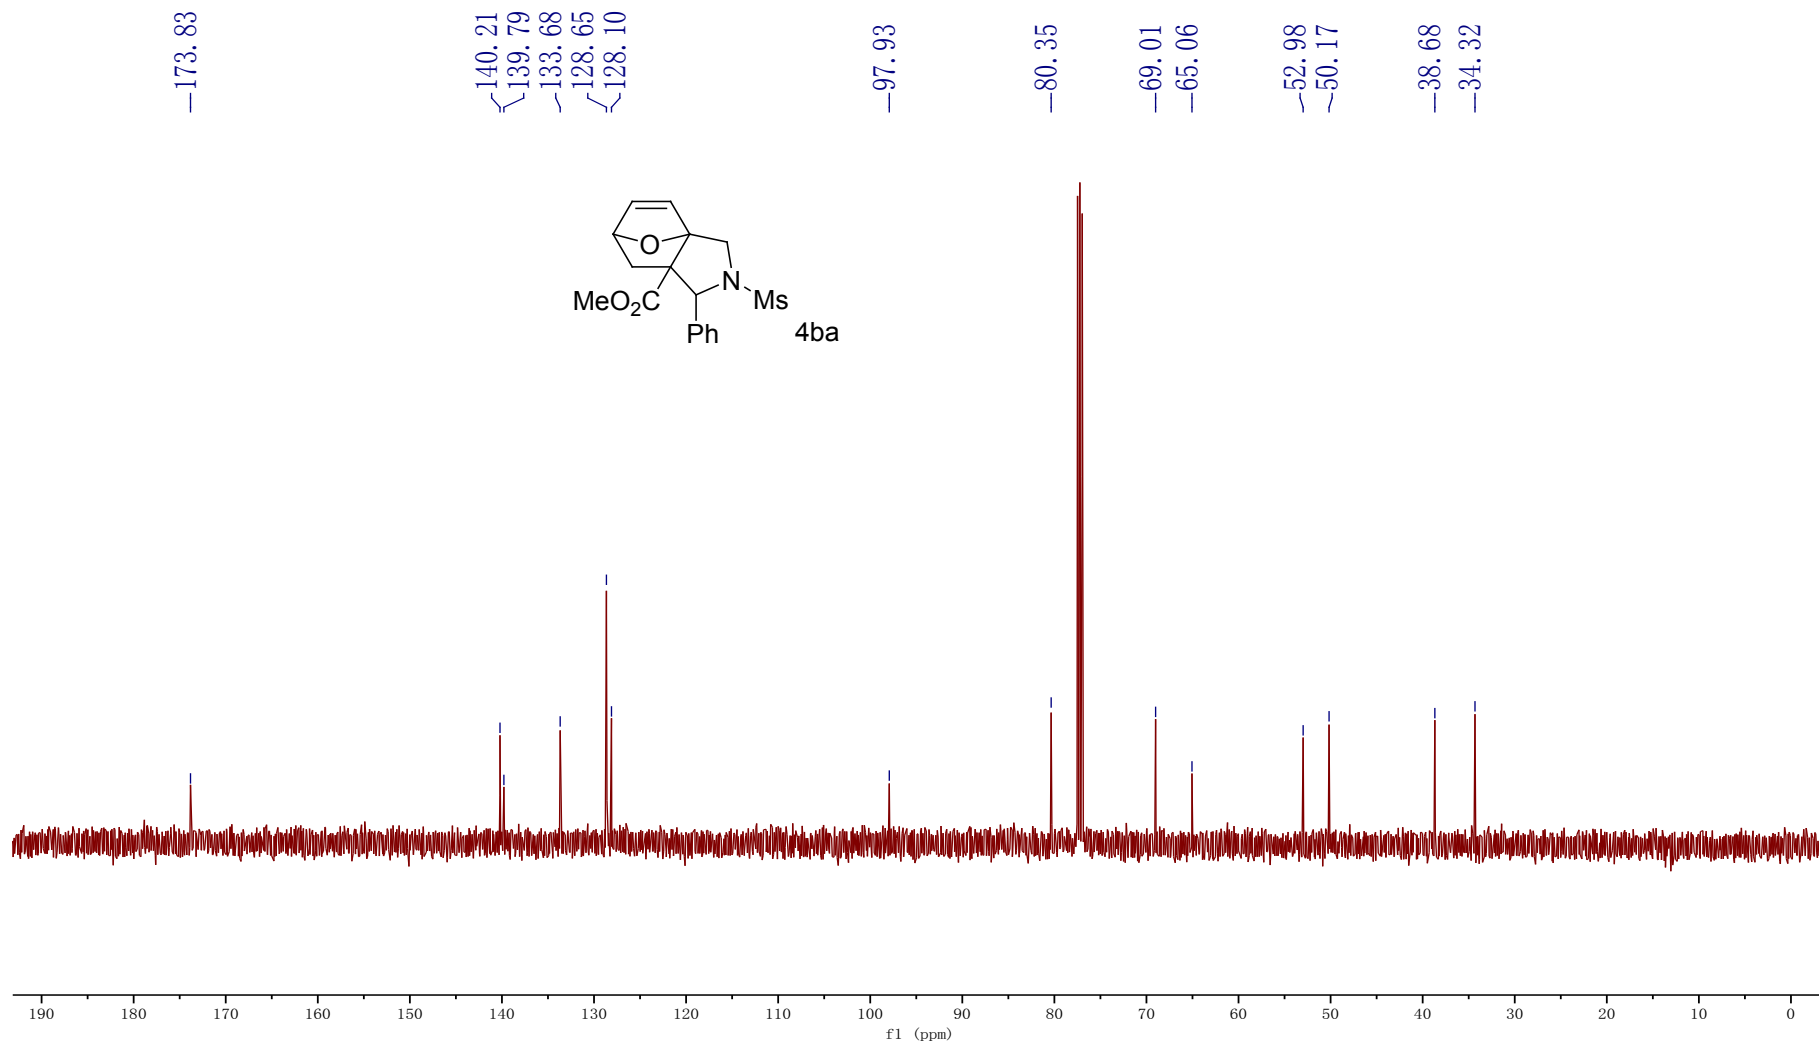

Spectra-45

4pf21bn2  
BOXD-PNO2

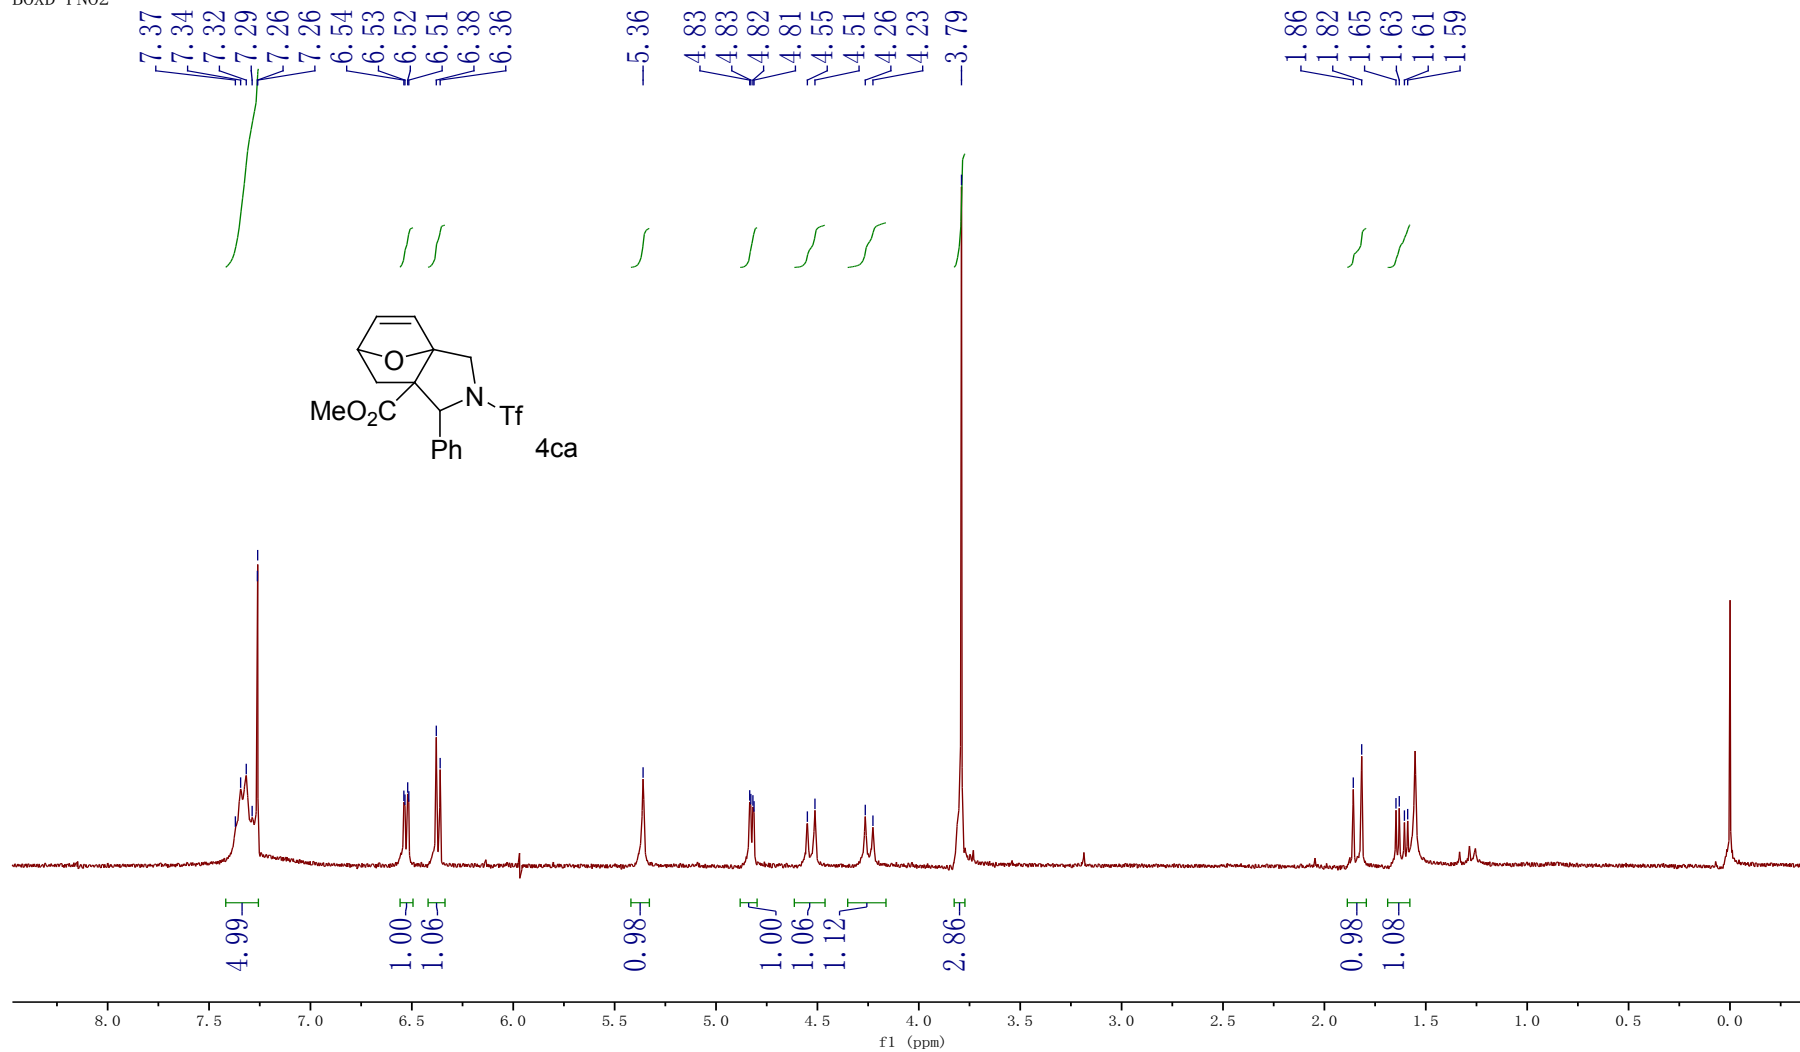

Spectra-46

4pf21c

—172.78

—140.57

—133.56

—128.36

—80.63

—70.62

—53.07

—51.55

—34.26

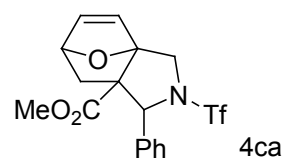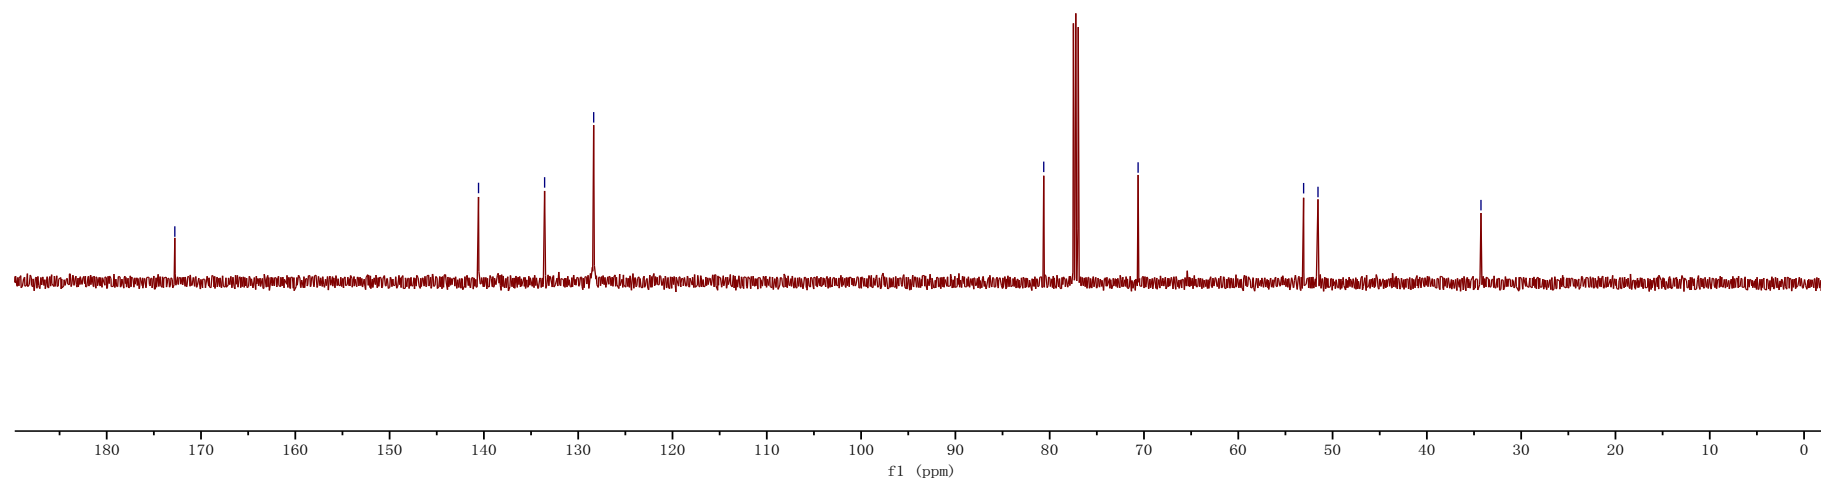

Spectra-47

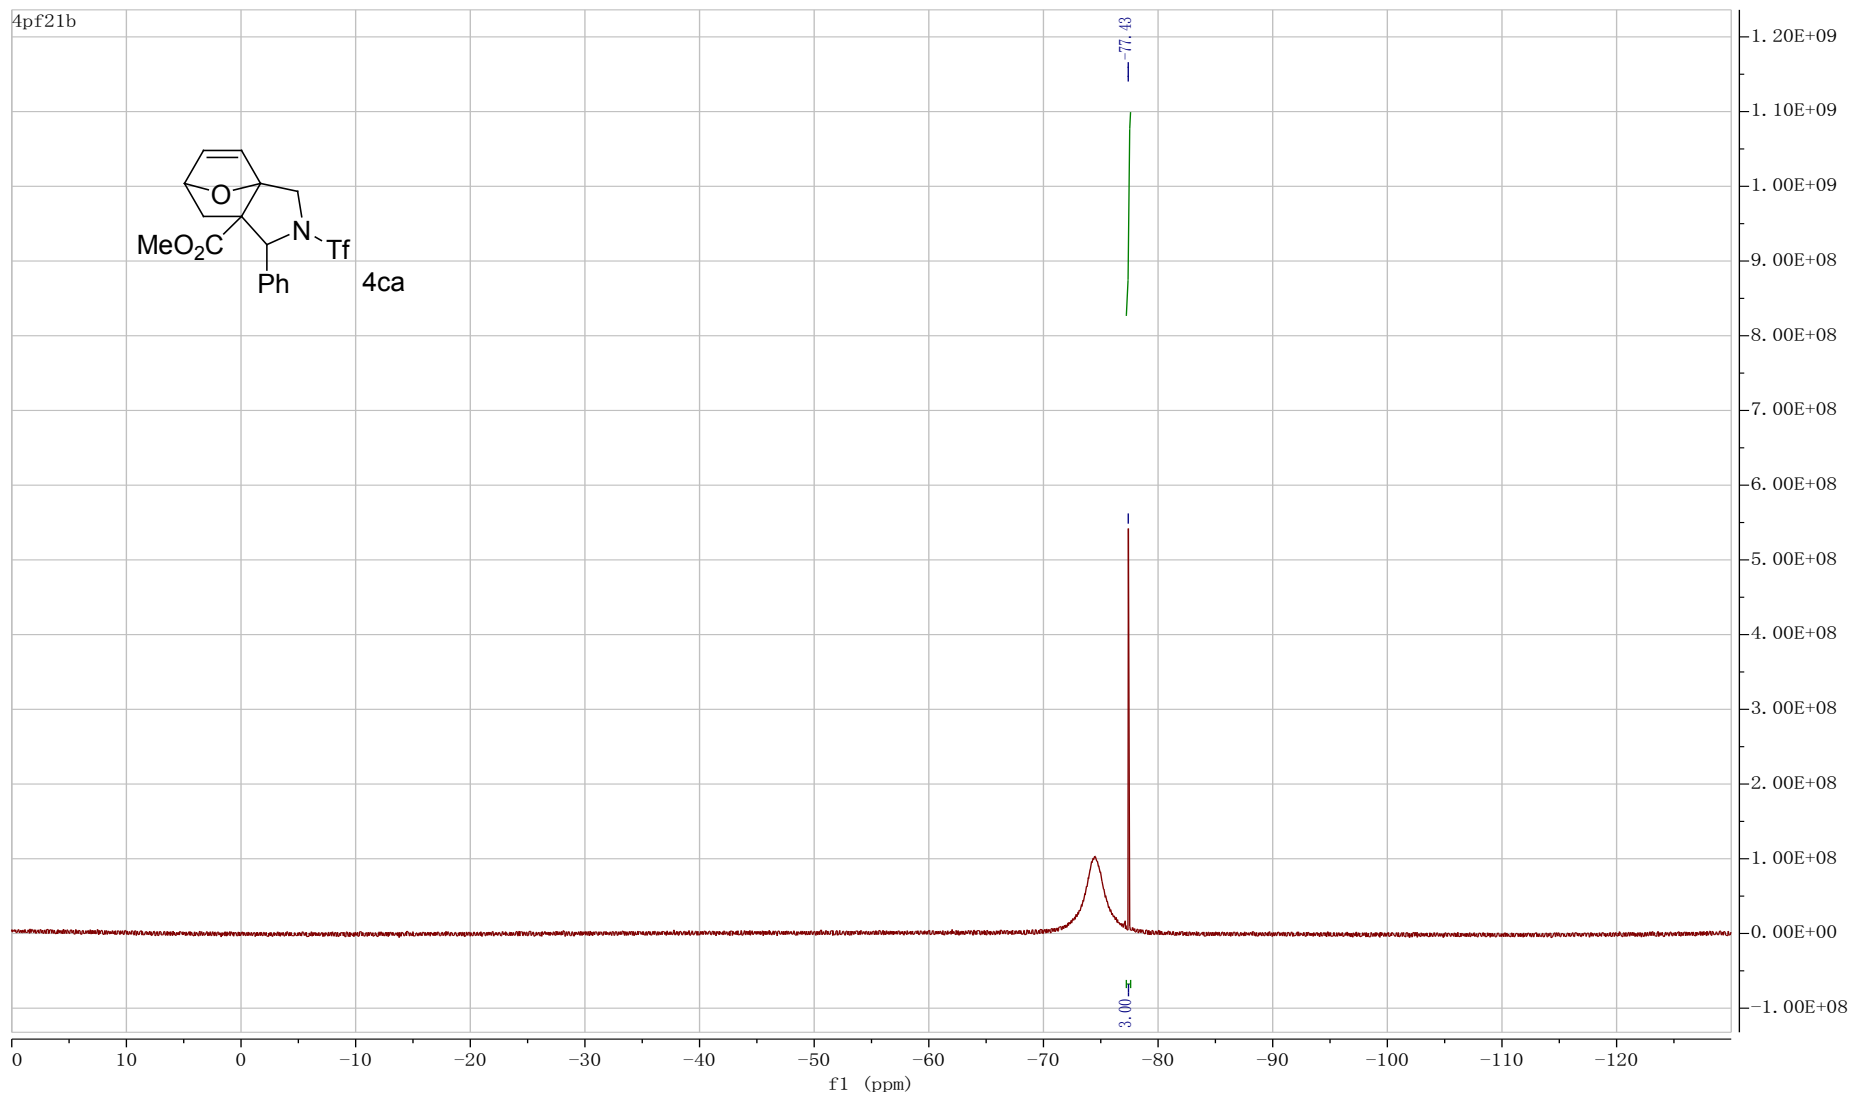

Spectra-48

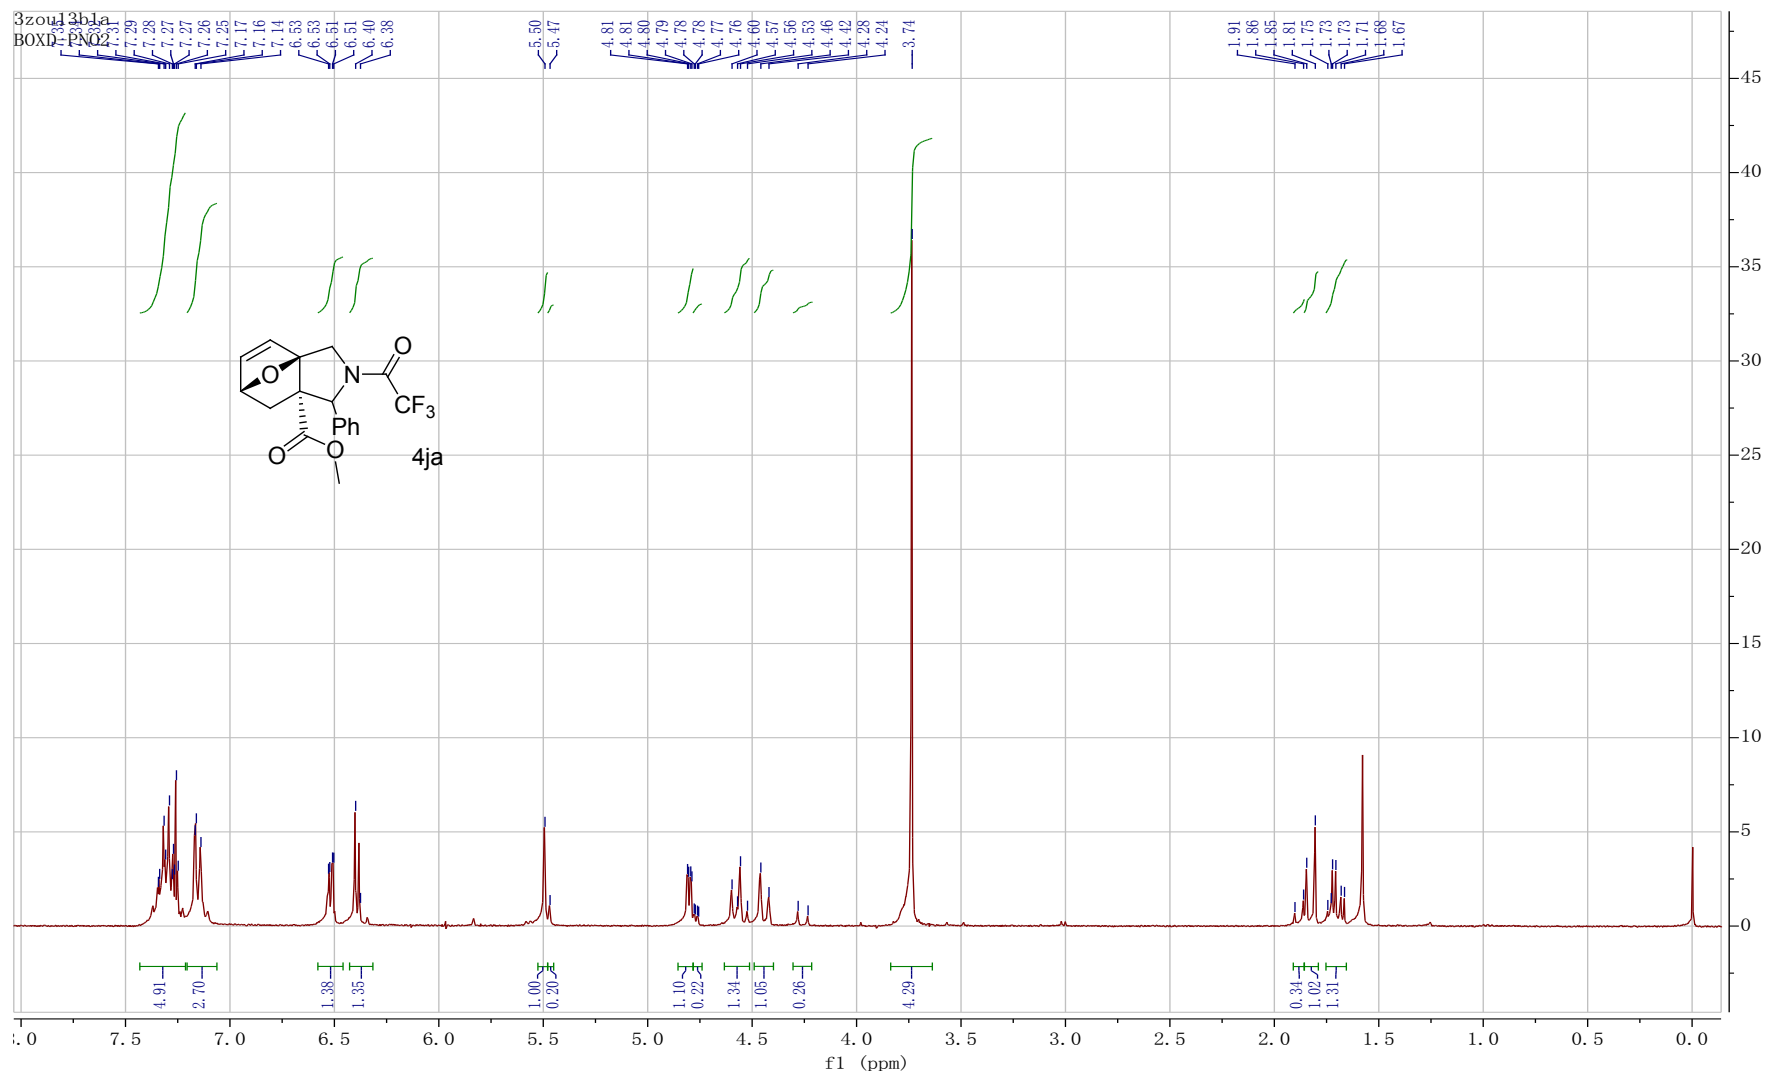

Spectra-49

3zou13b1-C-1

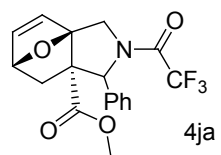

173.31

140.34  
137.90  
134.33  
133.62  
128.61  
128.08  
128.05  
127.99  
127.80

97.93

80.84  
80.63

68.78

62.75  
53.69

50.91  
49.31  
49.28  
49.24  
49.21

33.86  
33.72

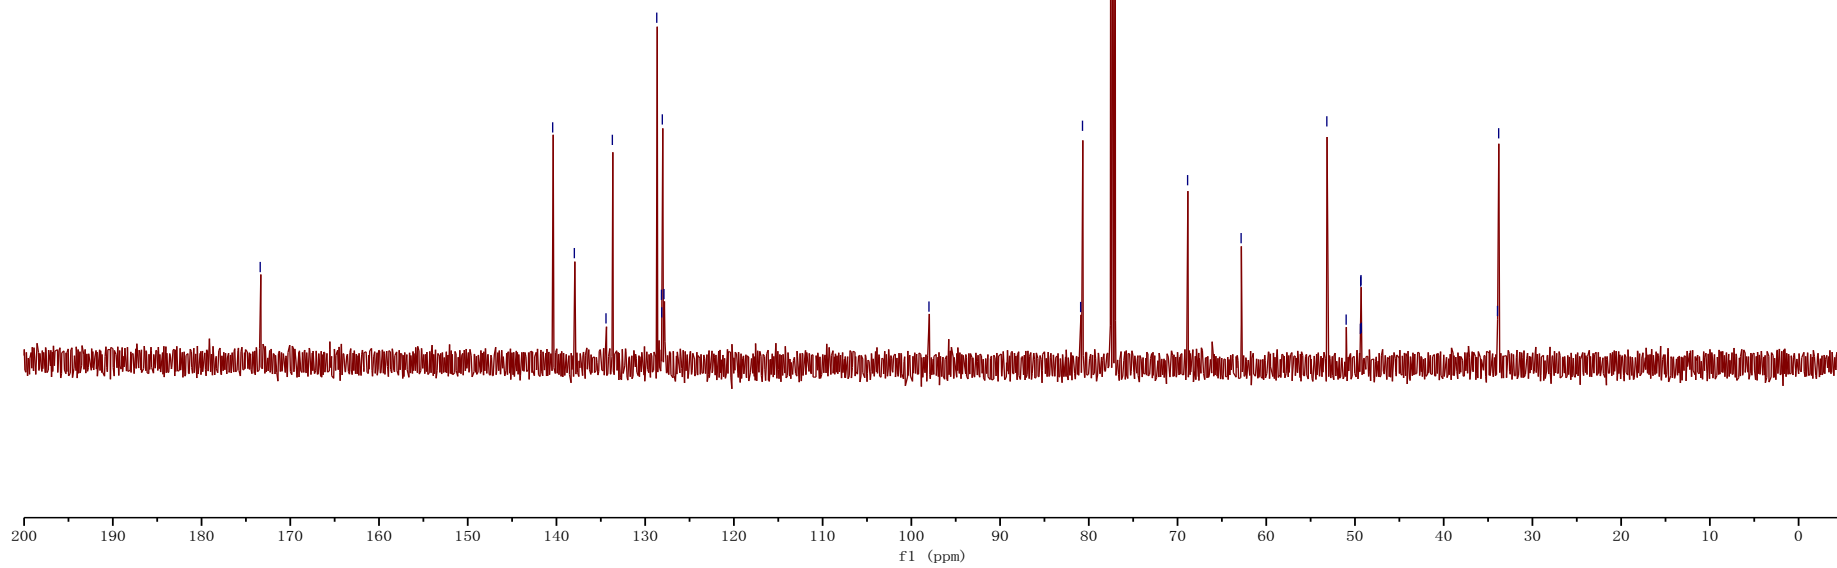

Spectra-50

3zou13b1

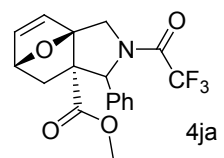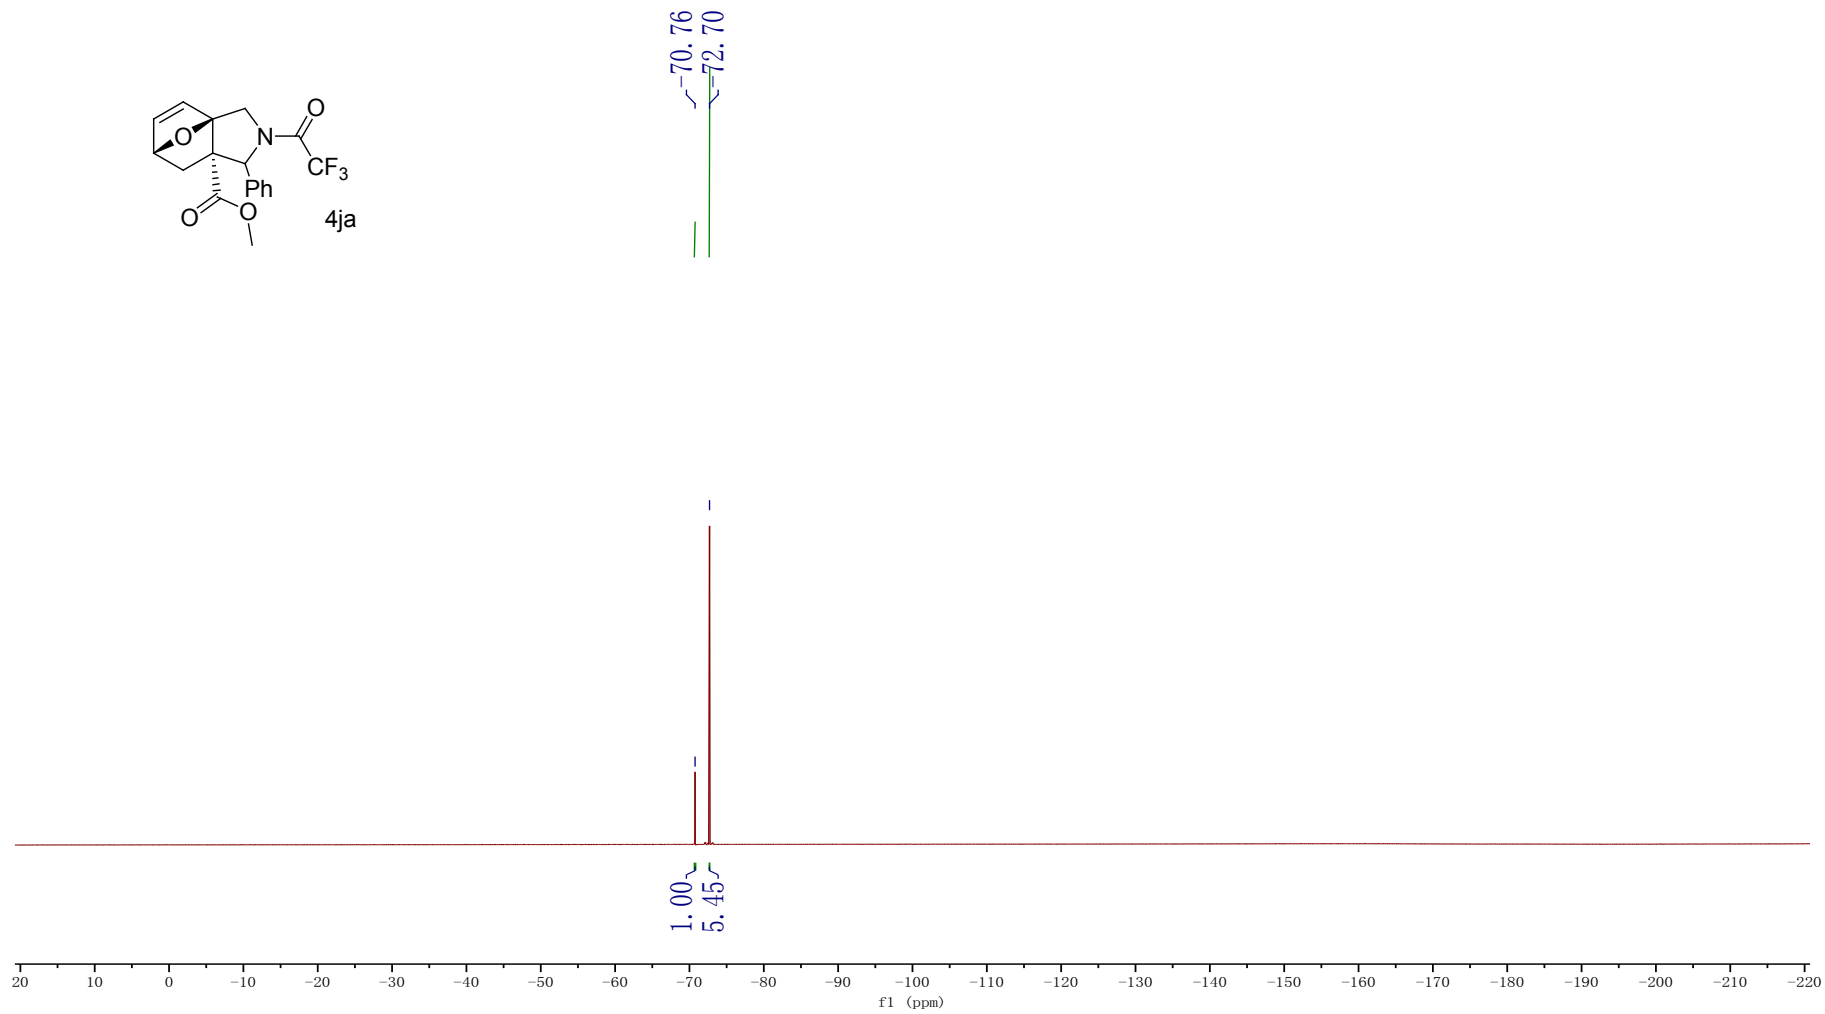

Spectra-51

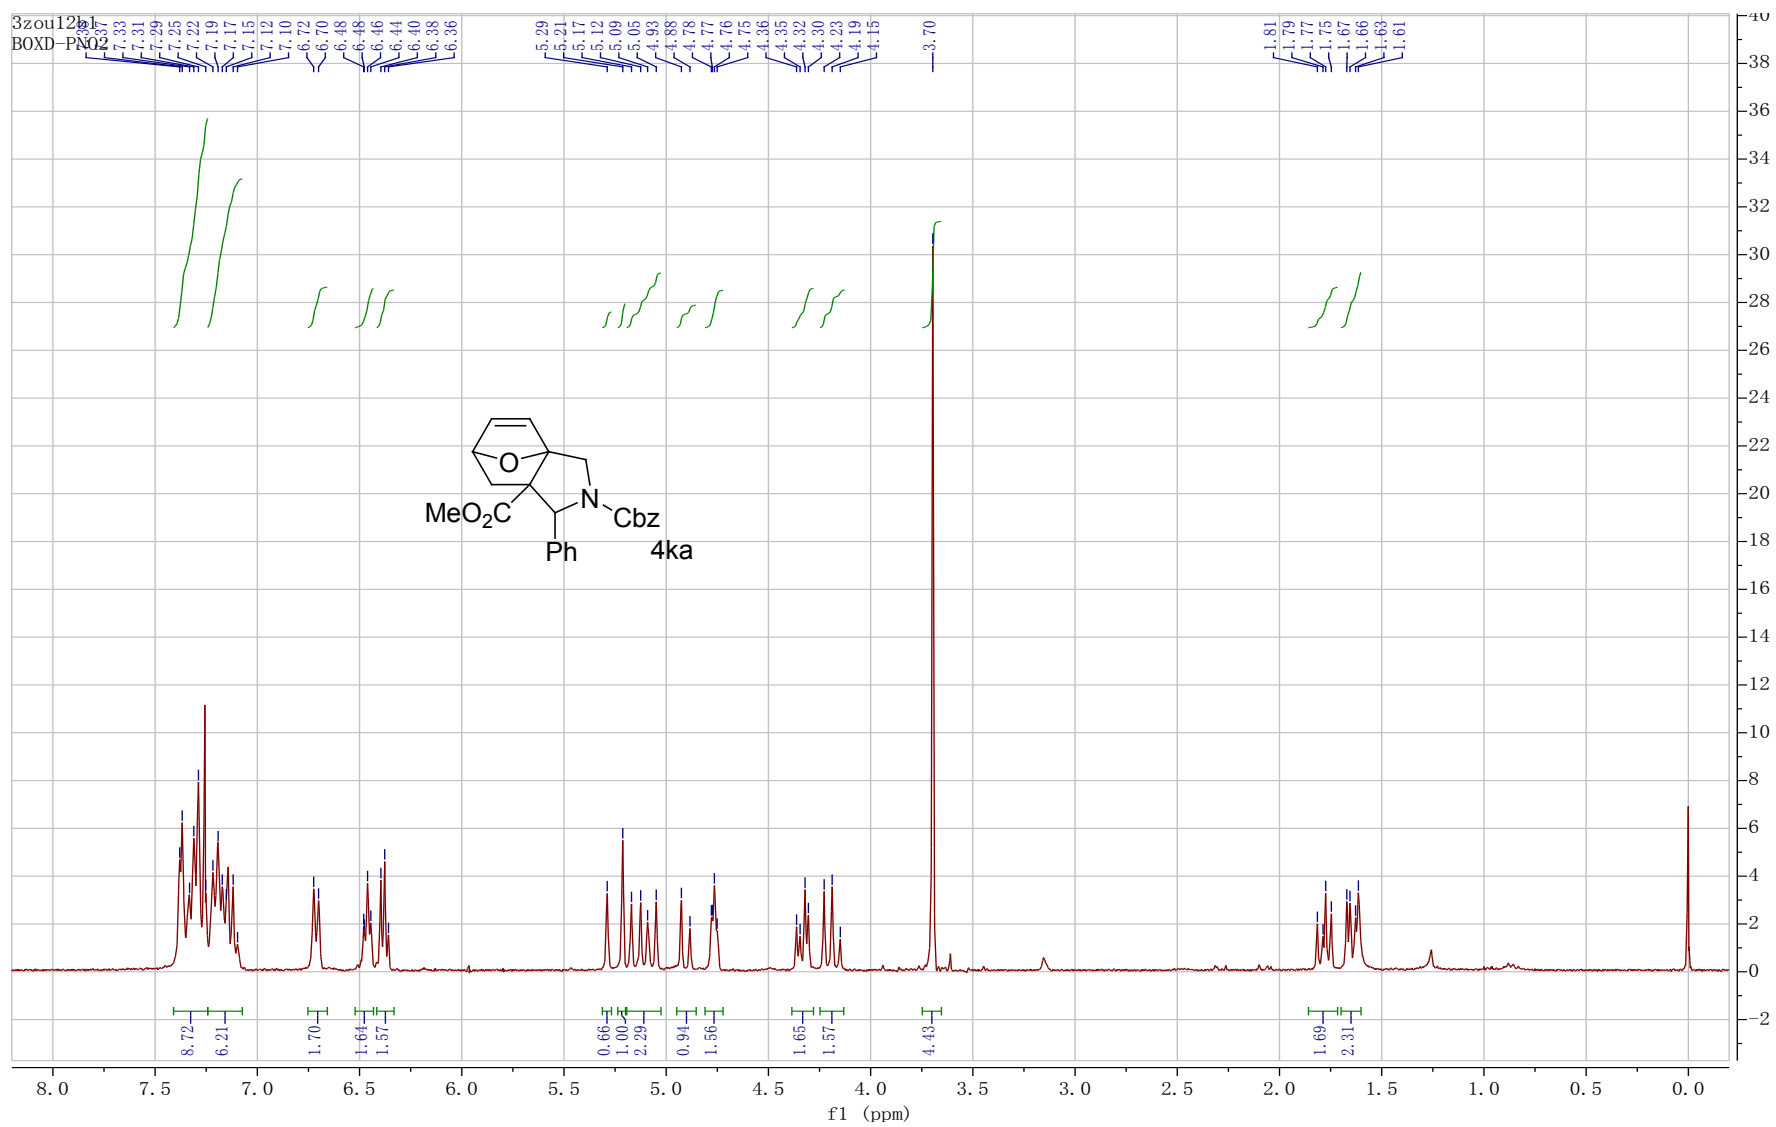

Spectra-52



3zou12b1

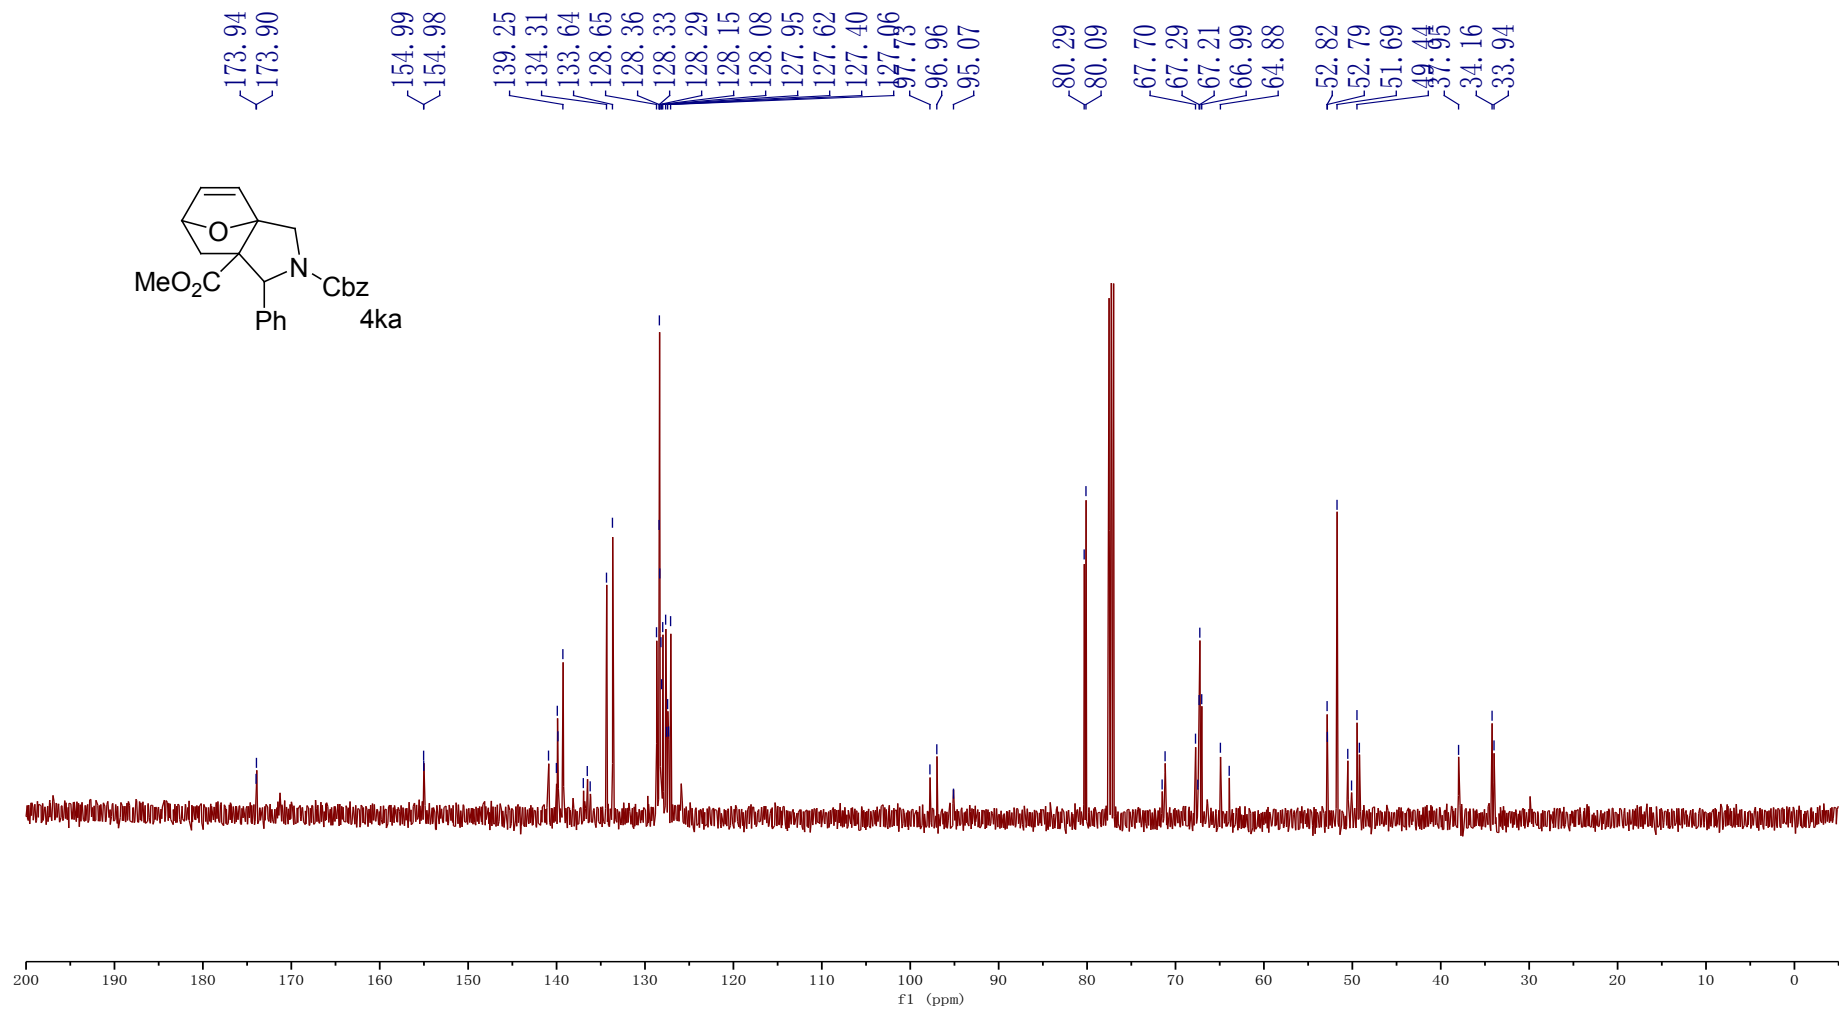

Spectra-53

4pf1a  
BOXD-PN02

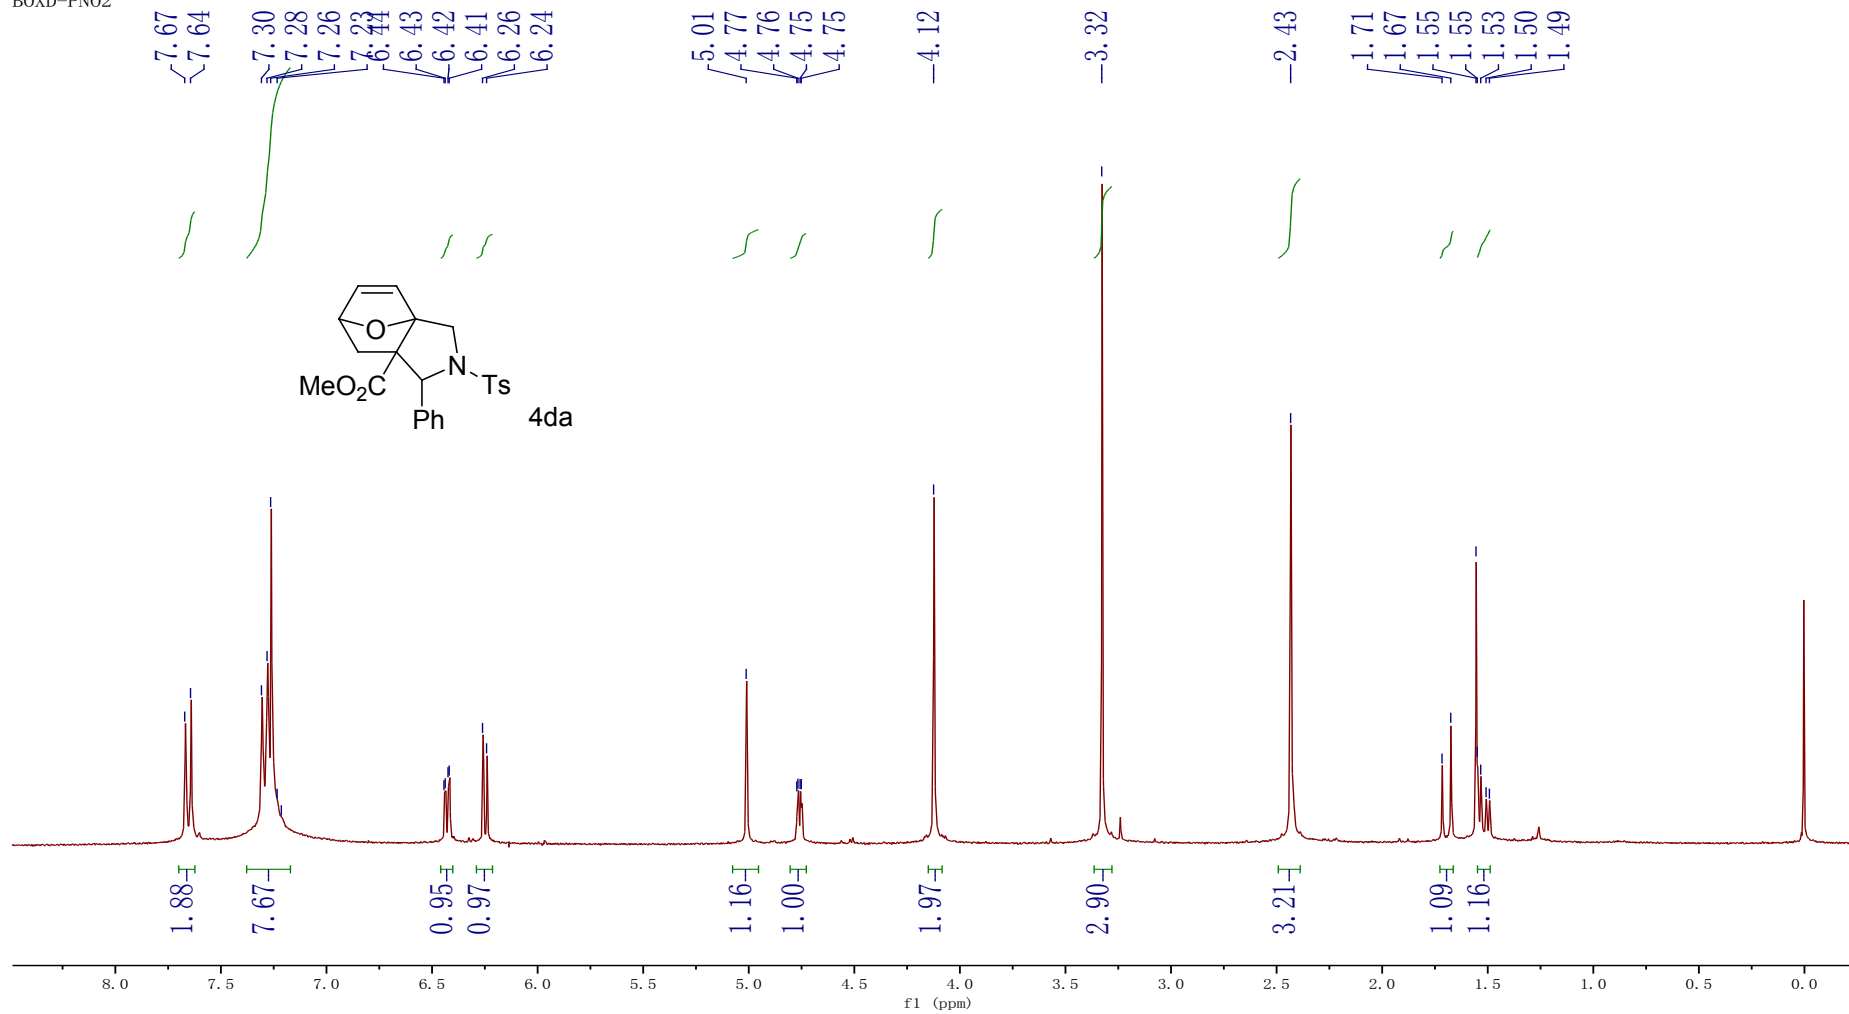

Spectra-54

4pf1a-c2  
6#

—173.34

143.57

140.14

140.11

134.90

133.57

129.59

128.03

127.72

—97.18

—80.18

—68.95

—65.25

~52.46

~50.36

—34.69

—21.69

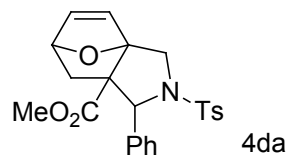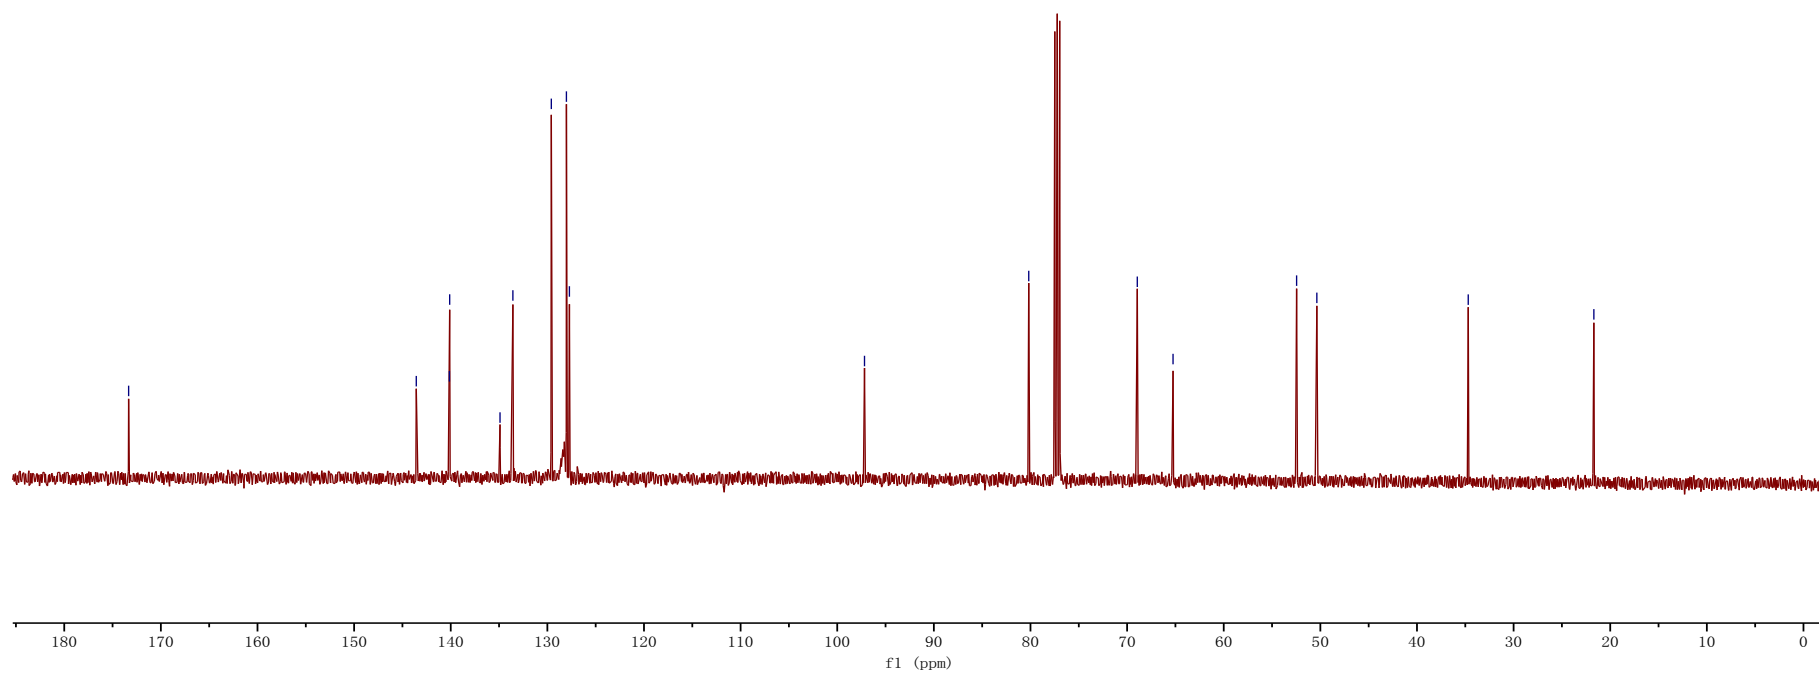

Spectra-55

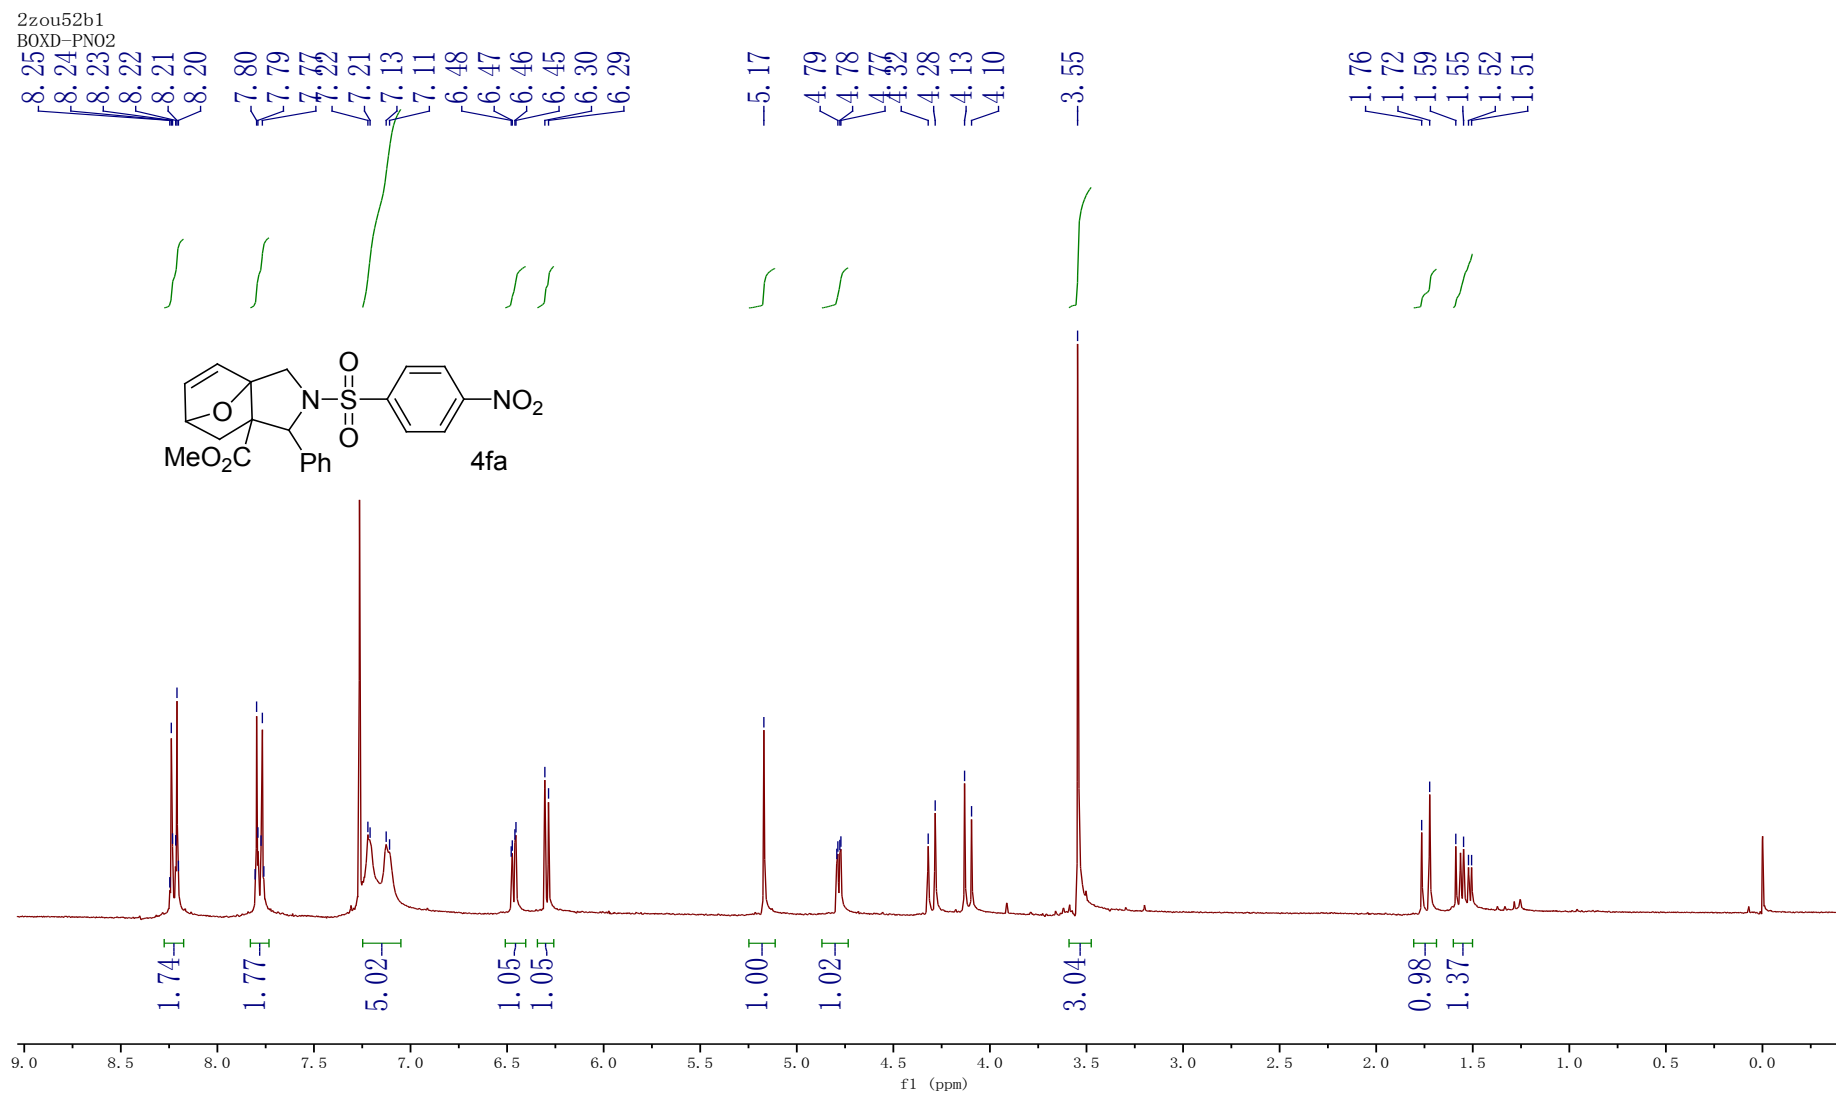

Spectra-56

2zou52b1-c

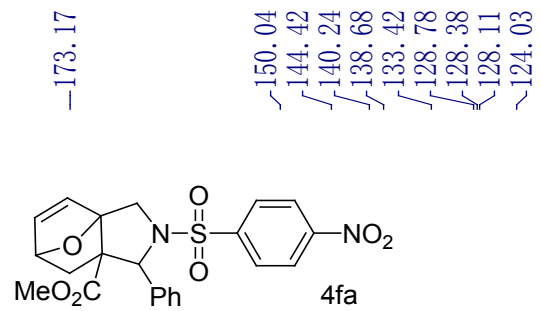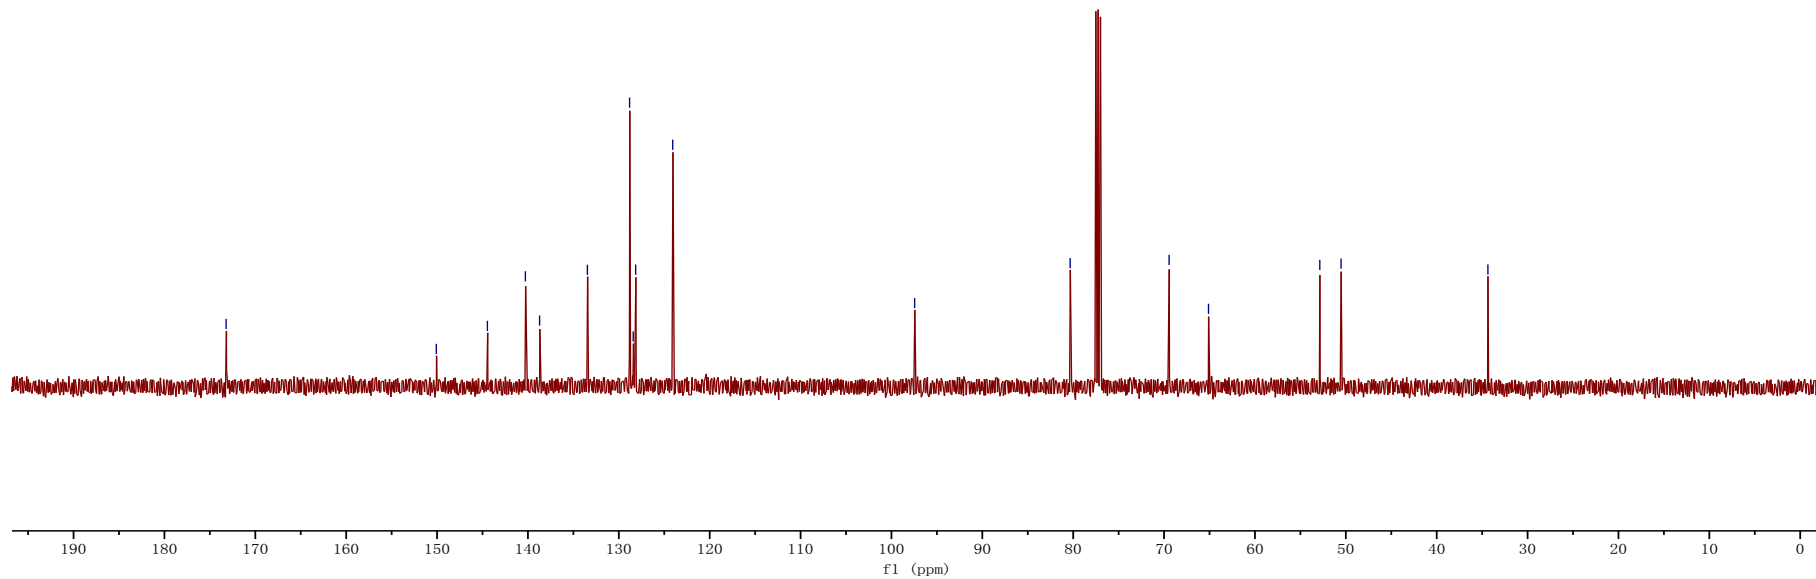

Spectra-57

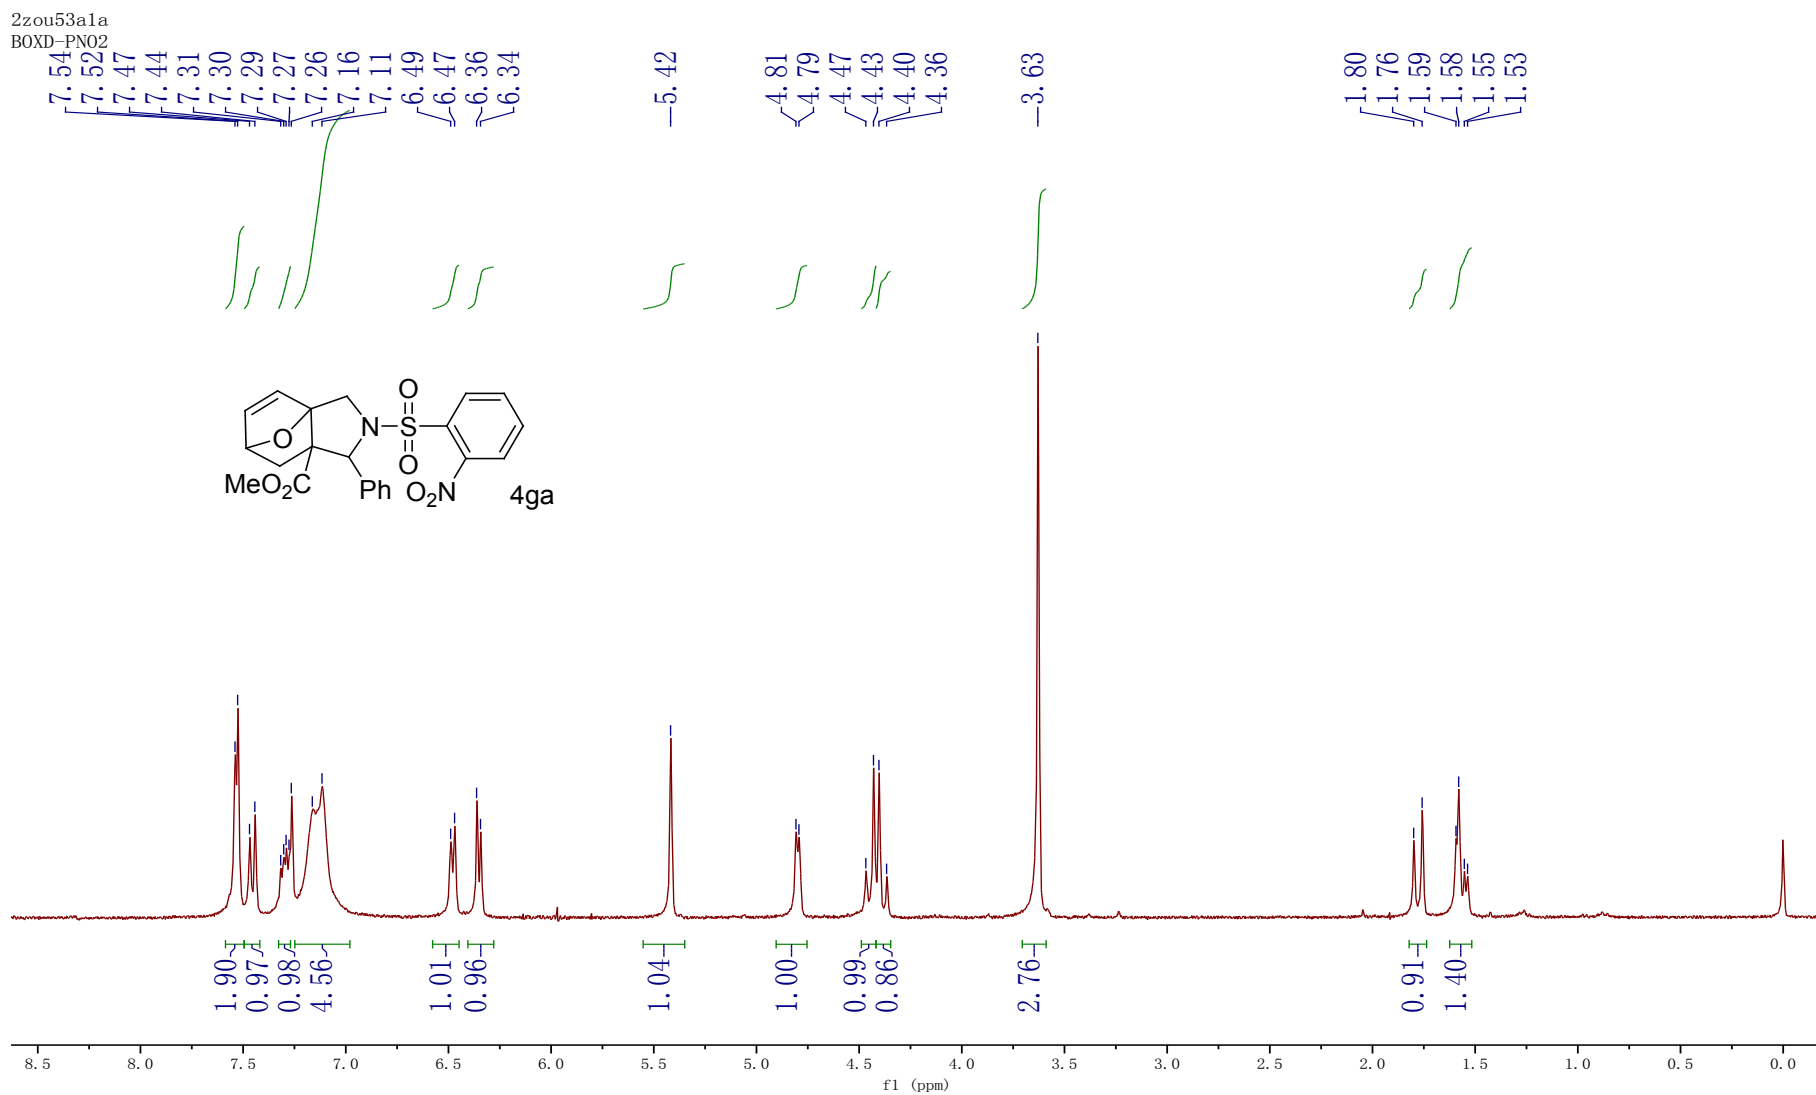

Spectra-58

2zou531a

—173.25  
—140.06  
—138.50  
—133.66  
—133.36  
—132.42  
—131.26  
—131.02  
—128.89  
—128.21  
—127.86  
—123.68  
—97.39  
—80.27  
—69.06  
—65.23  
—52.80  
—50.68  
—34.27

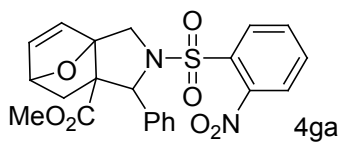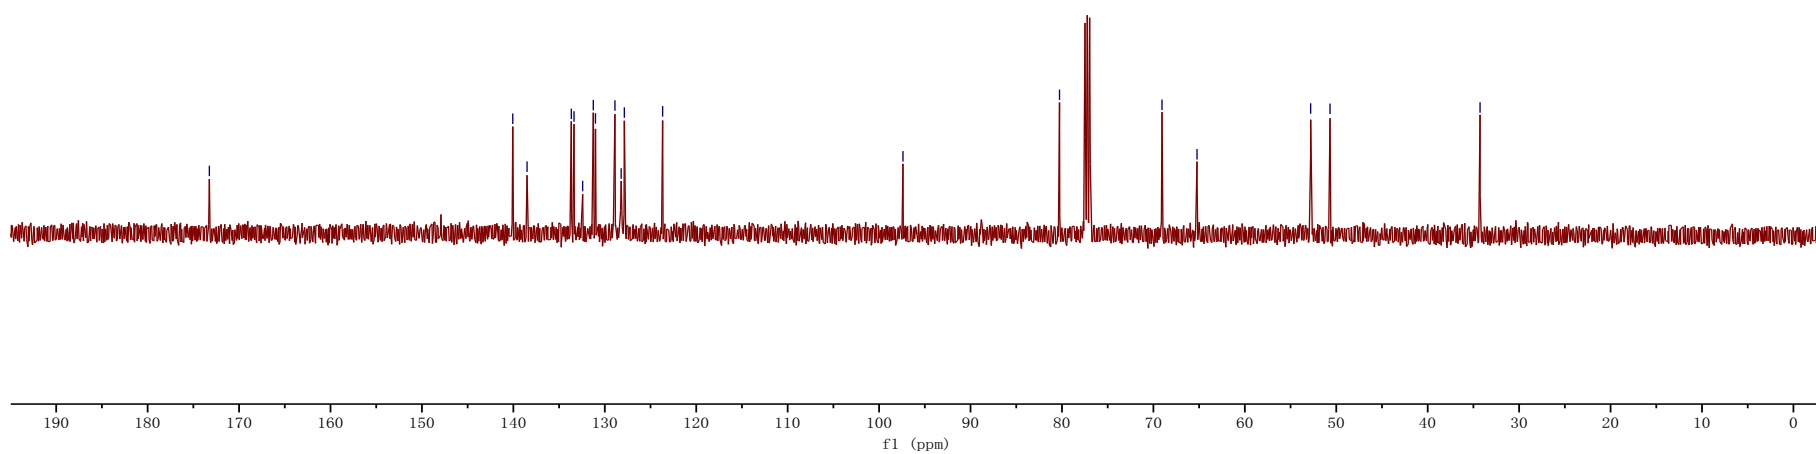

Spectra-59

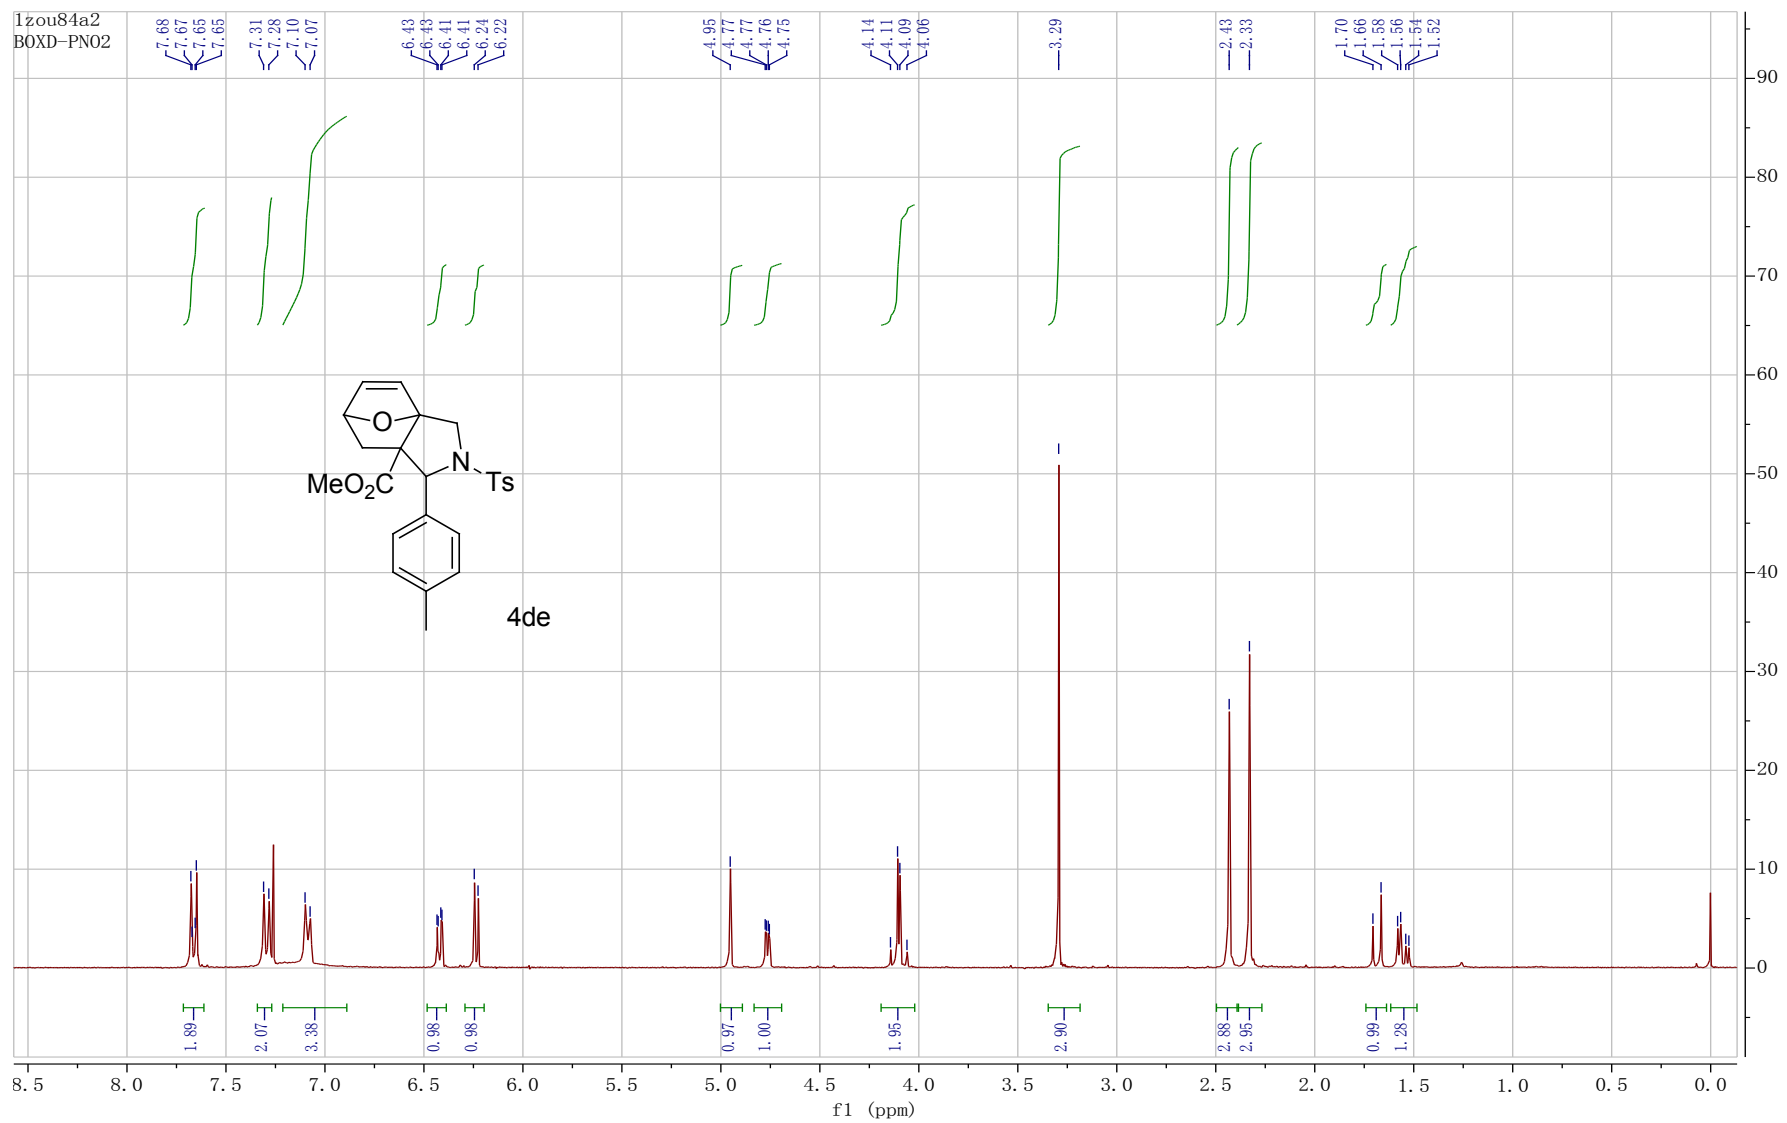

Spectra-60



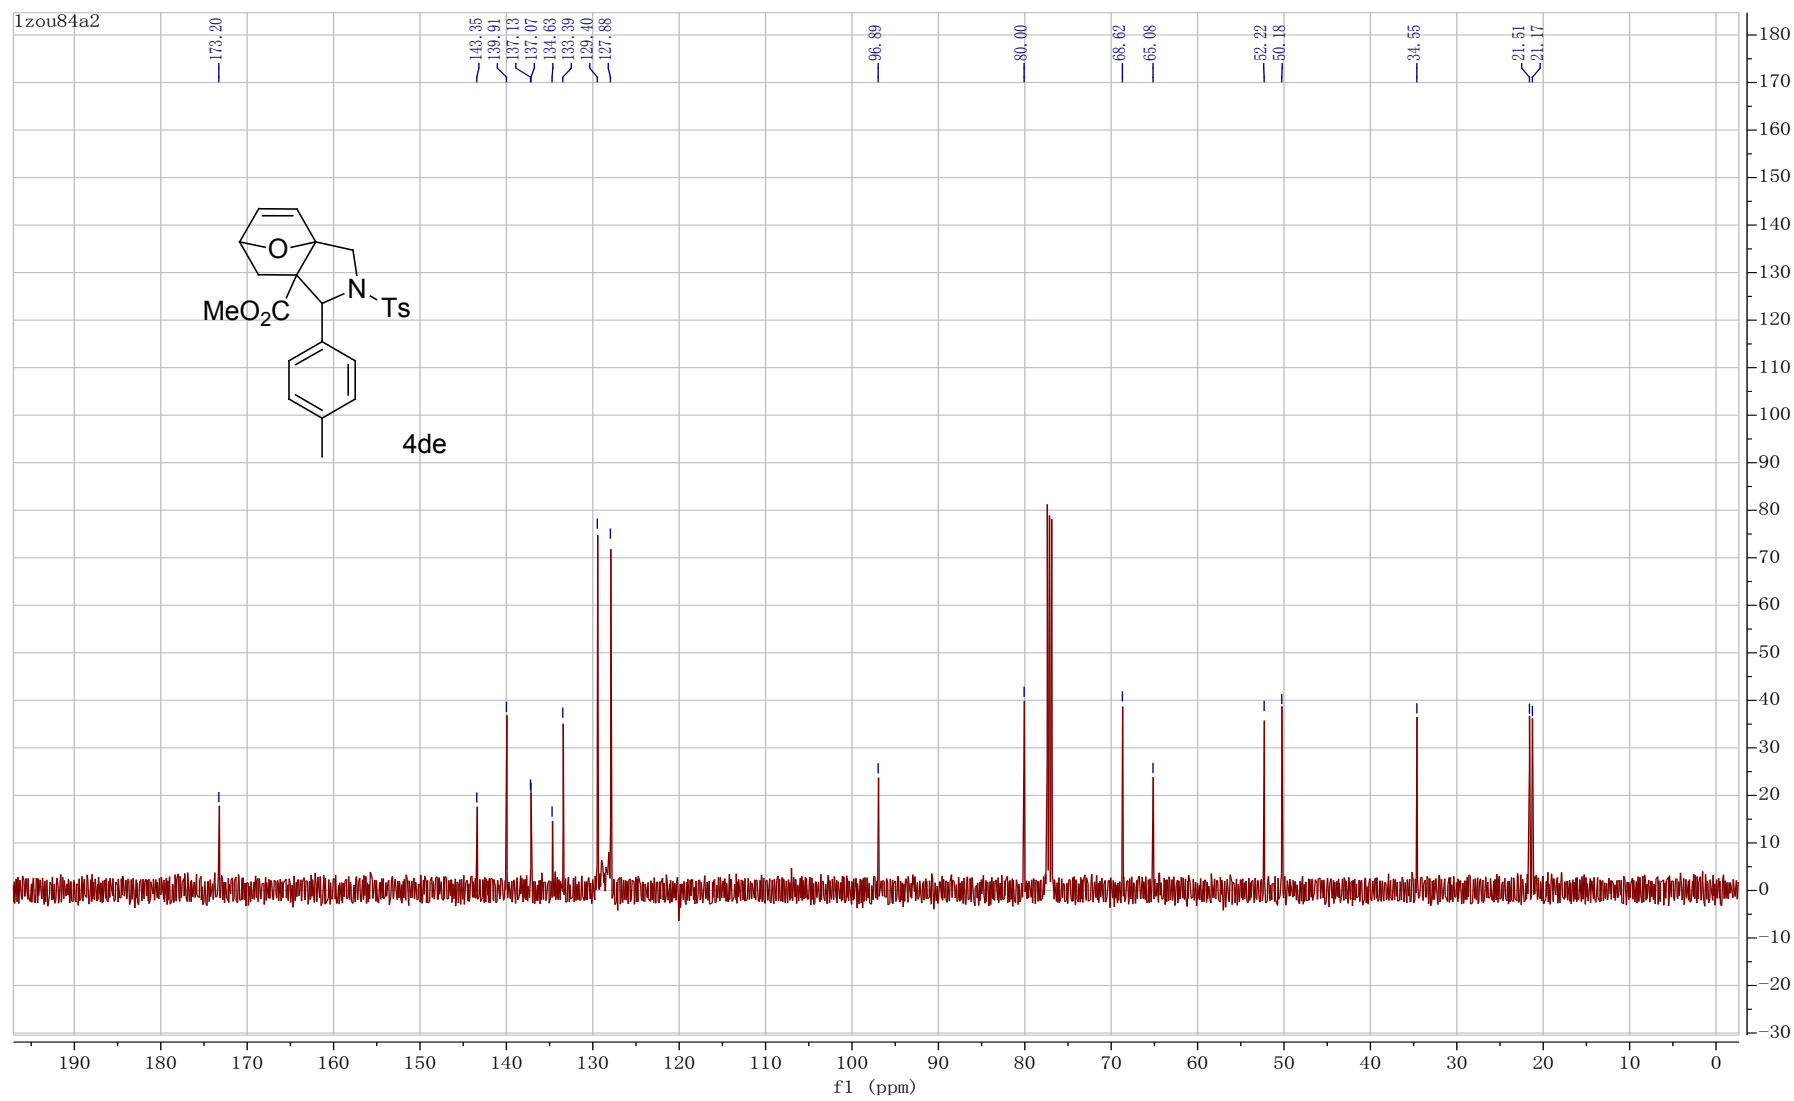

Spectra-61

4pf110abn3  
BOXD-PN02

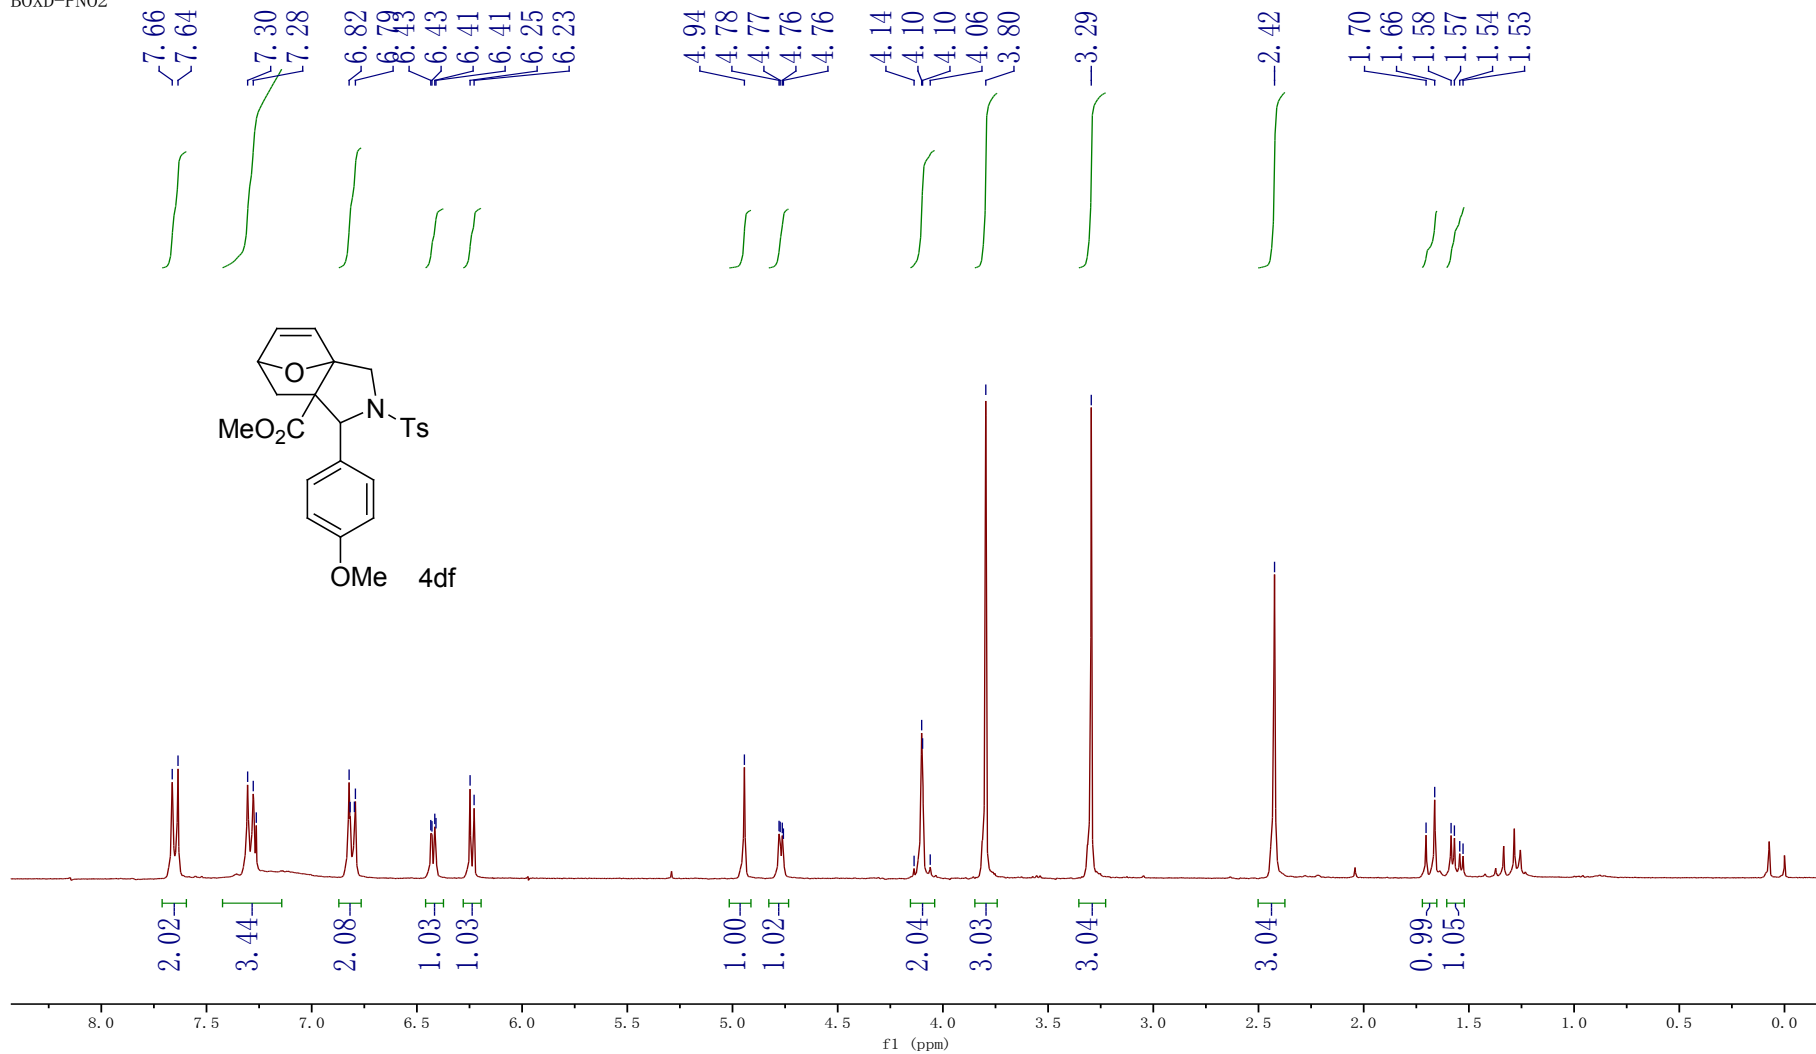

Spectra-62

4pf110abn3-c-1

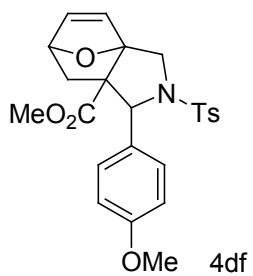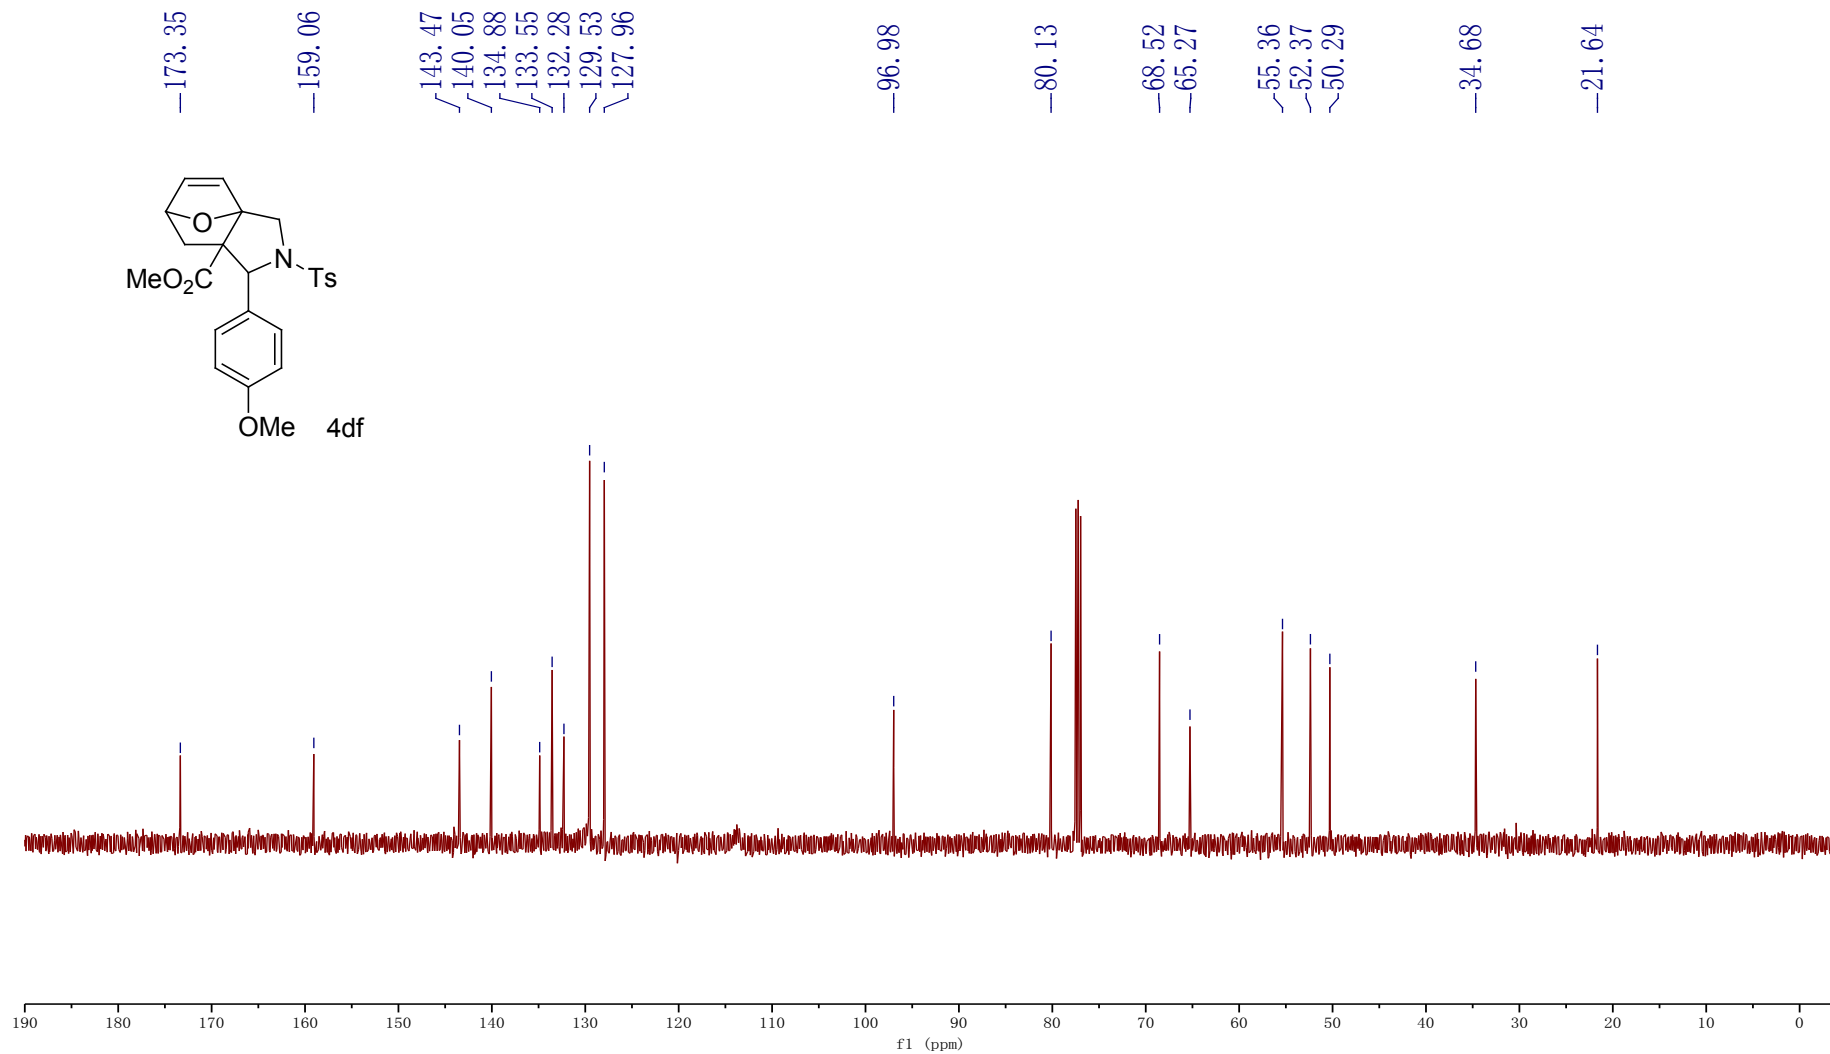

Spectra-63

4pf121bn2  
BOXD-PN02

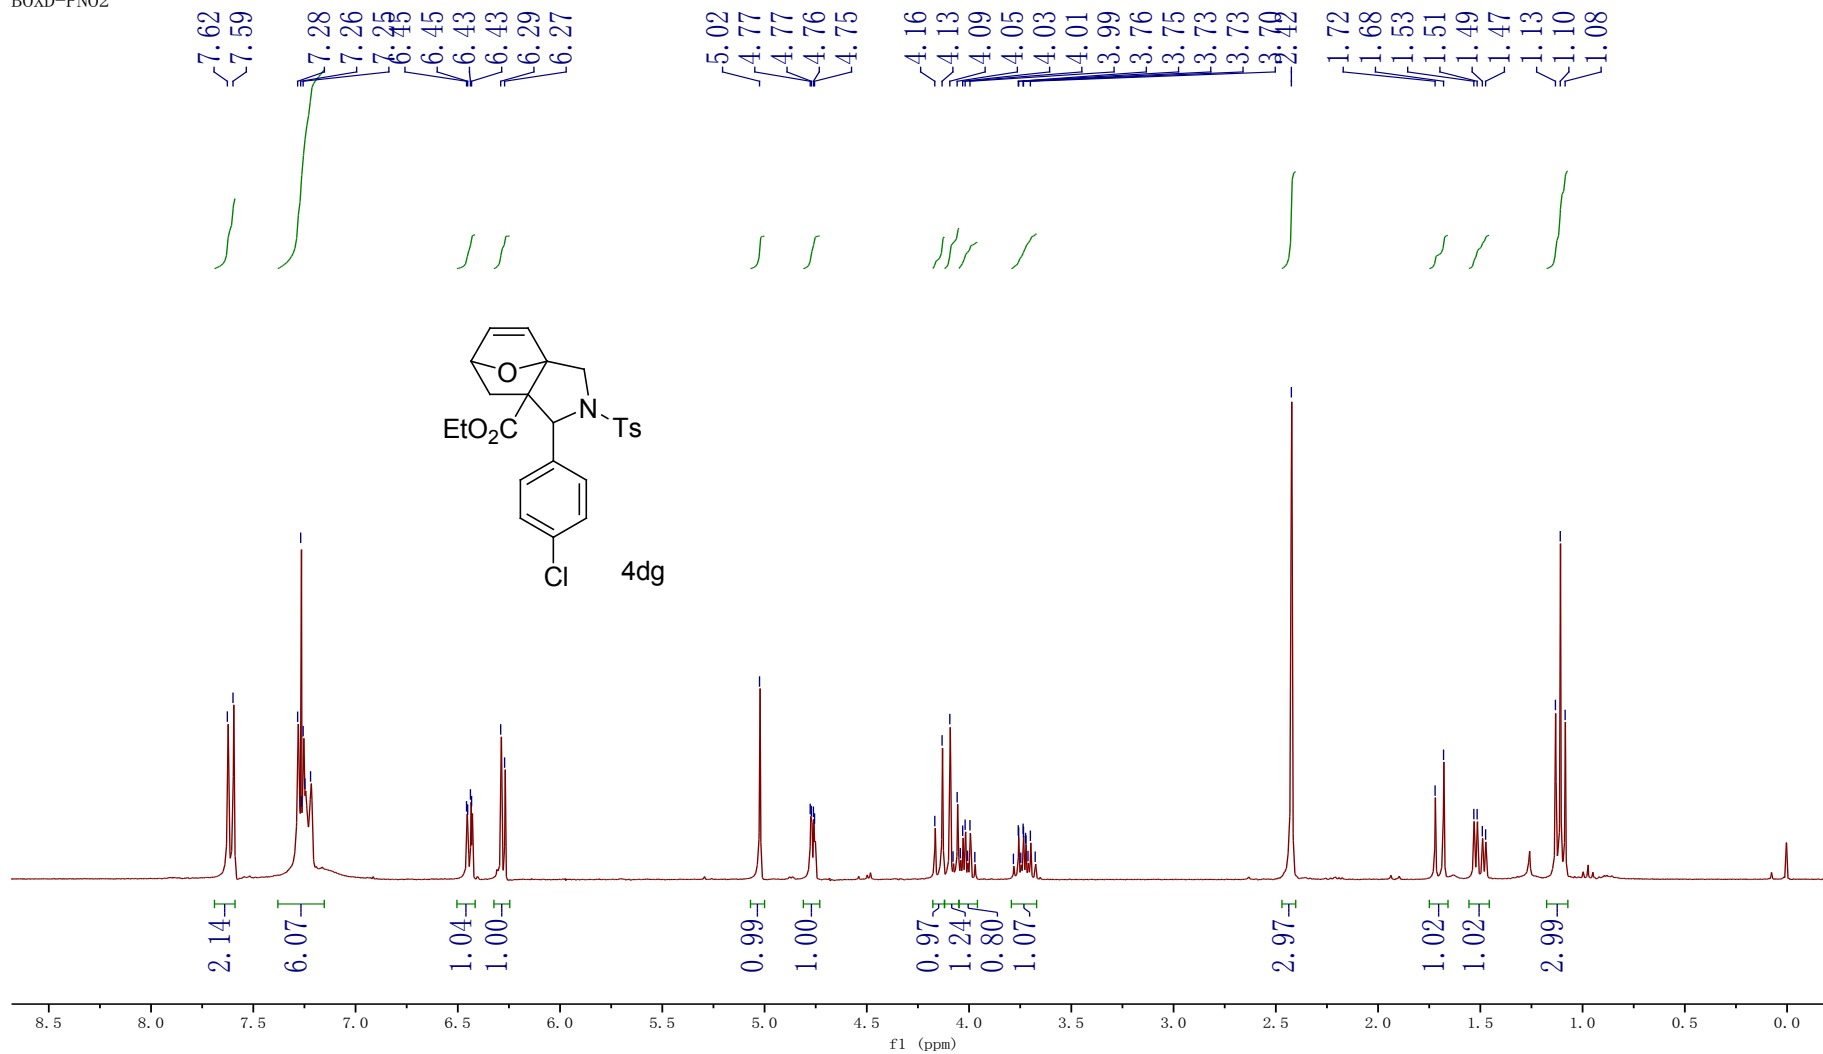

Spectra-64

4pf121b-c

—172.62  
143.76  
140.02  
138.75  
135.11  
133.51  
133.43  
129.60  
127.86  
—97.09  
—80.08  
—68.31  
—65.11  
—61.56  
—50.27  
—34.80  
—21.66  
—14.11

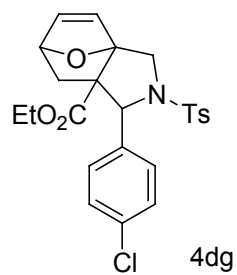

4dg

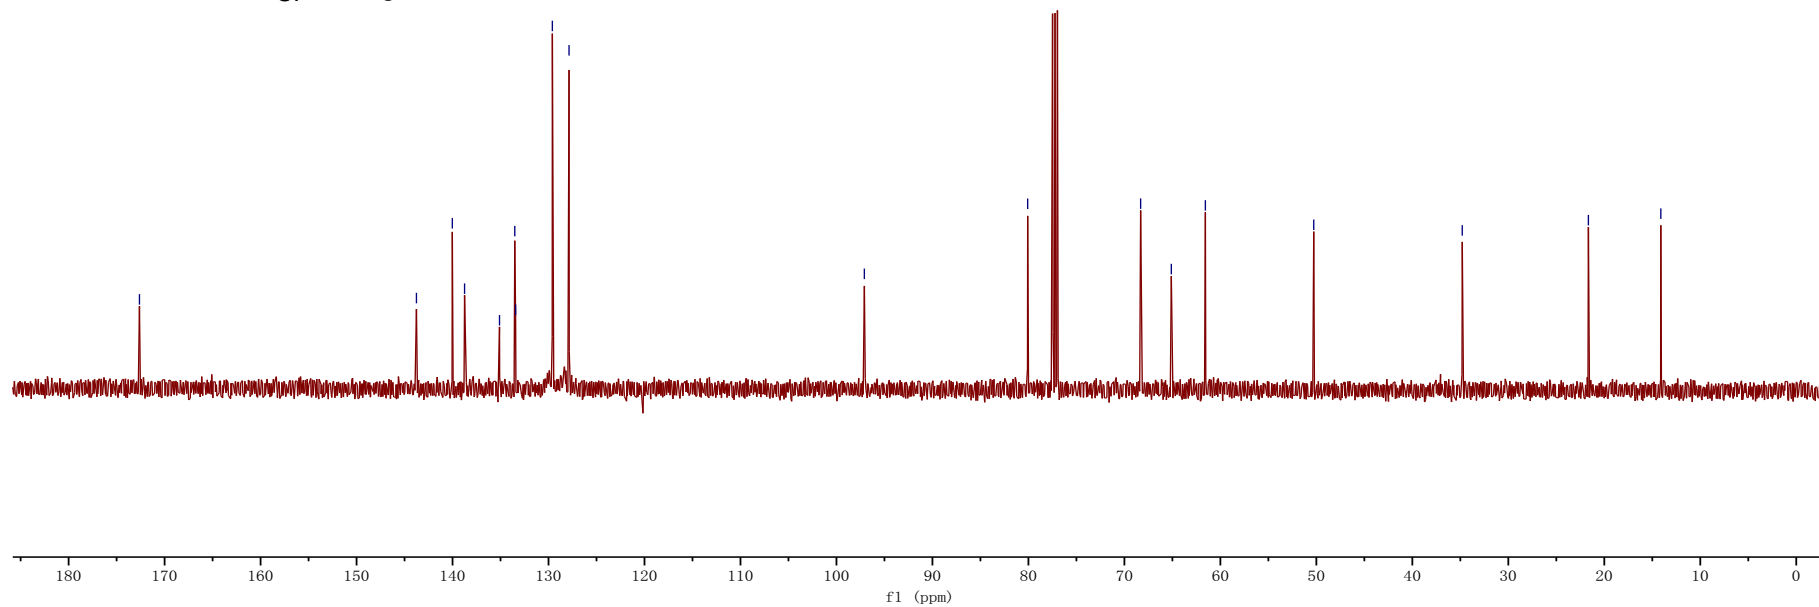

Spectra-65

4pf136a-H

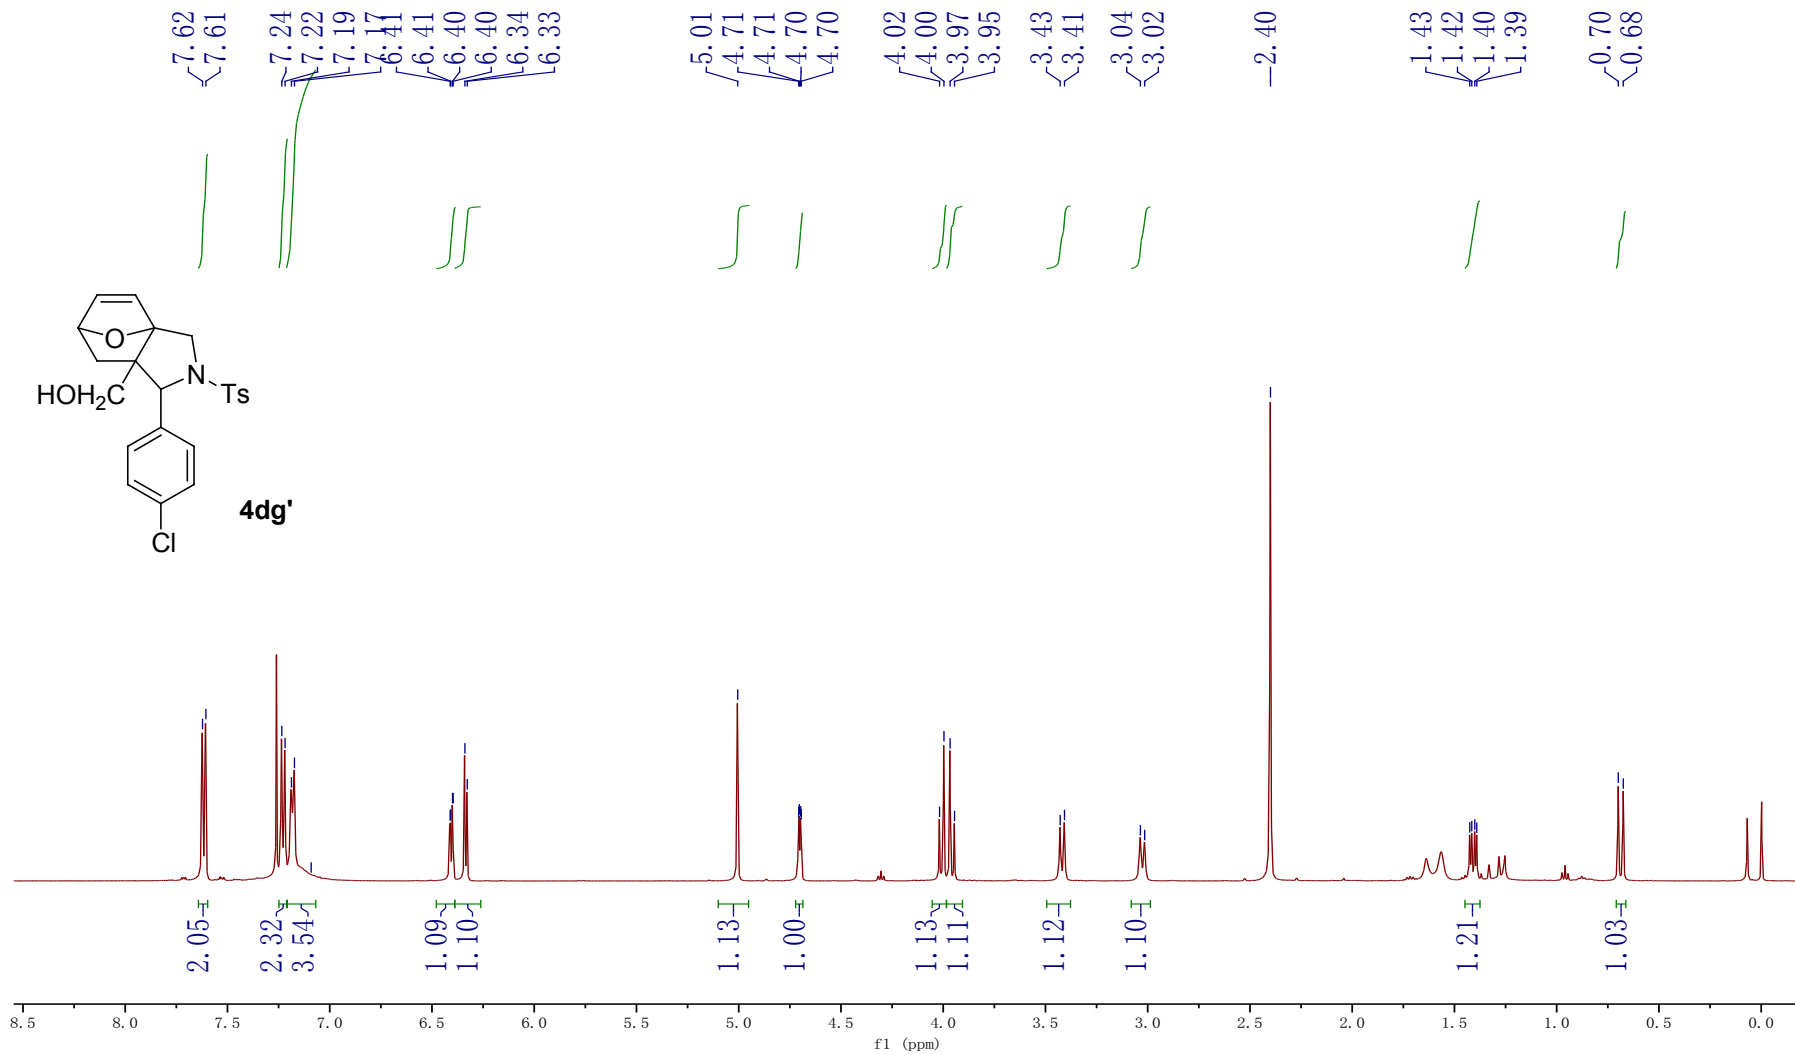

Spectra-66

4pf136a-c

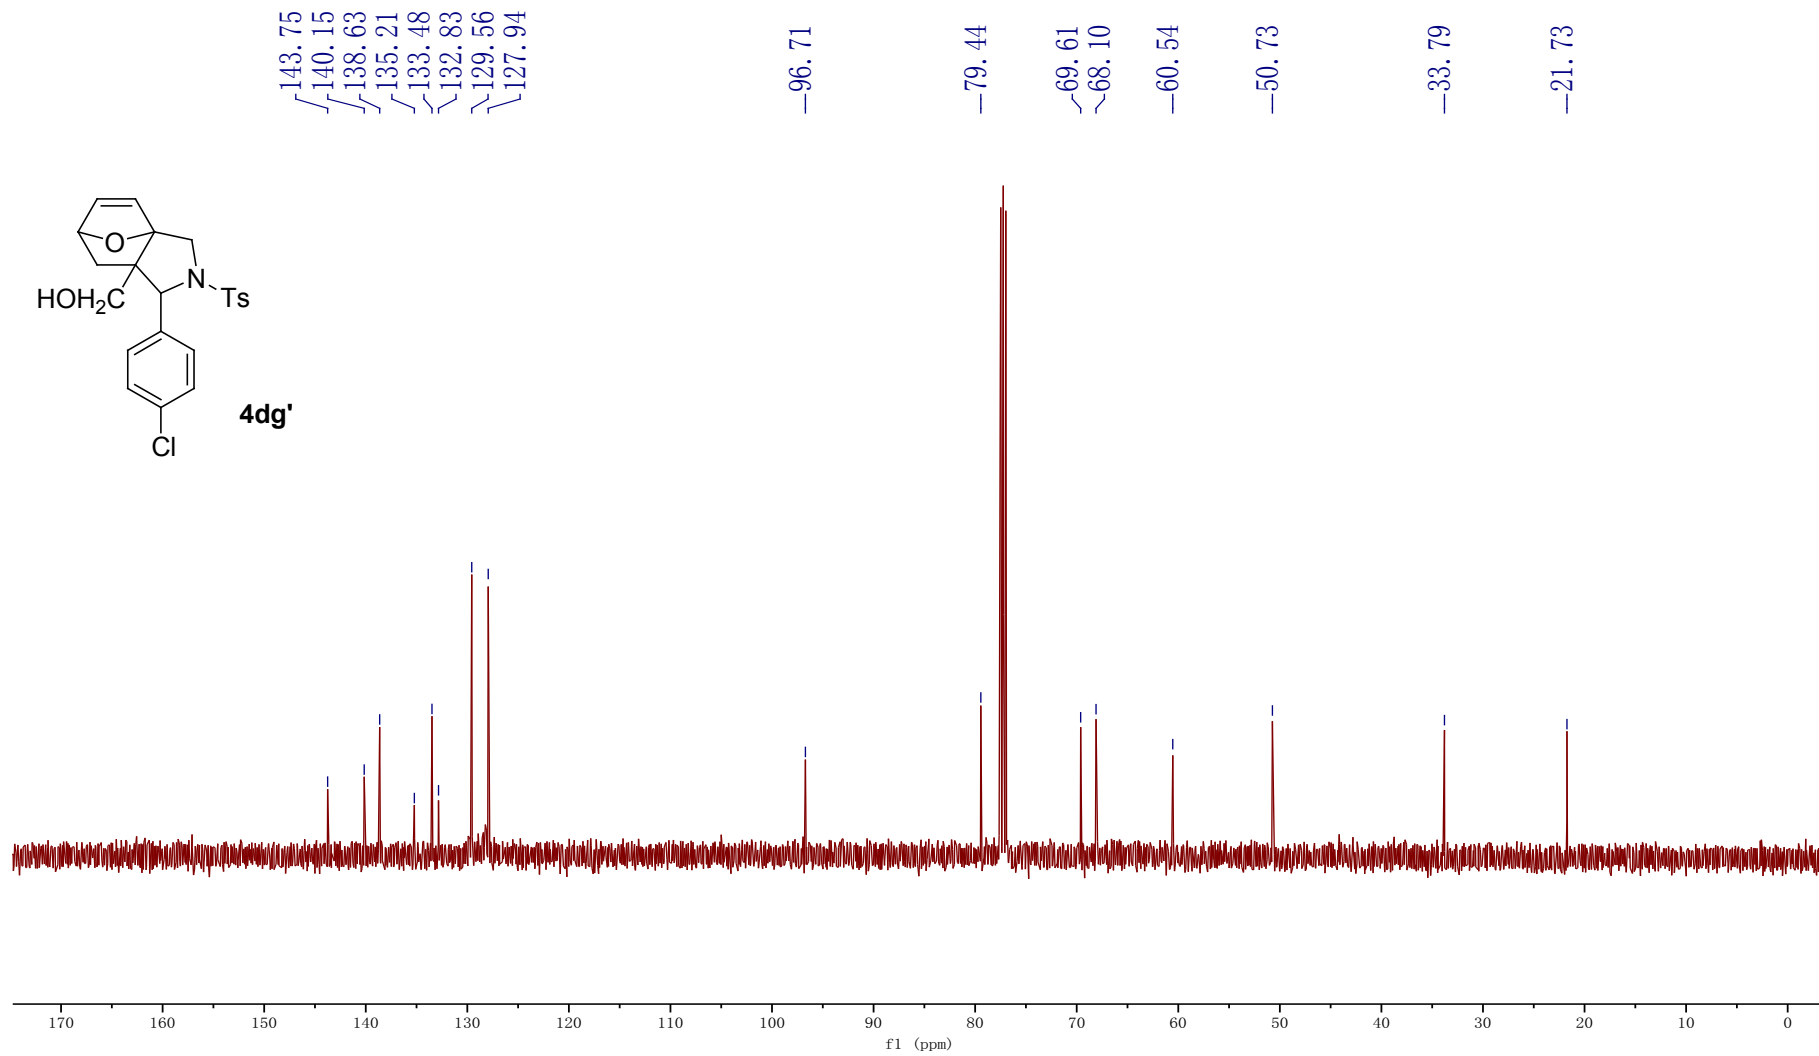

Spectra-67

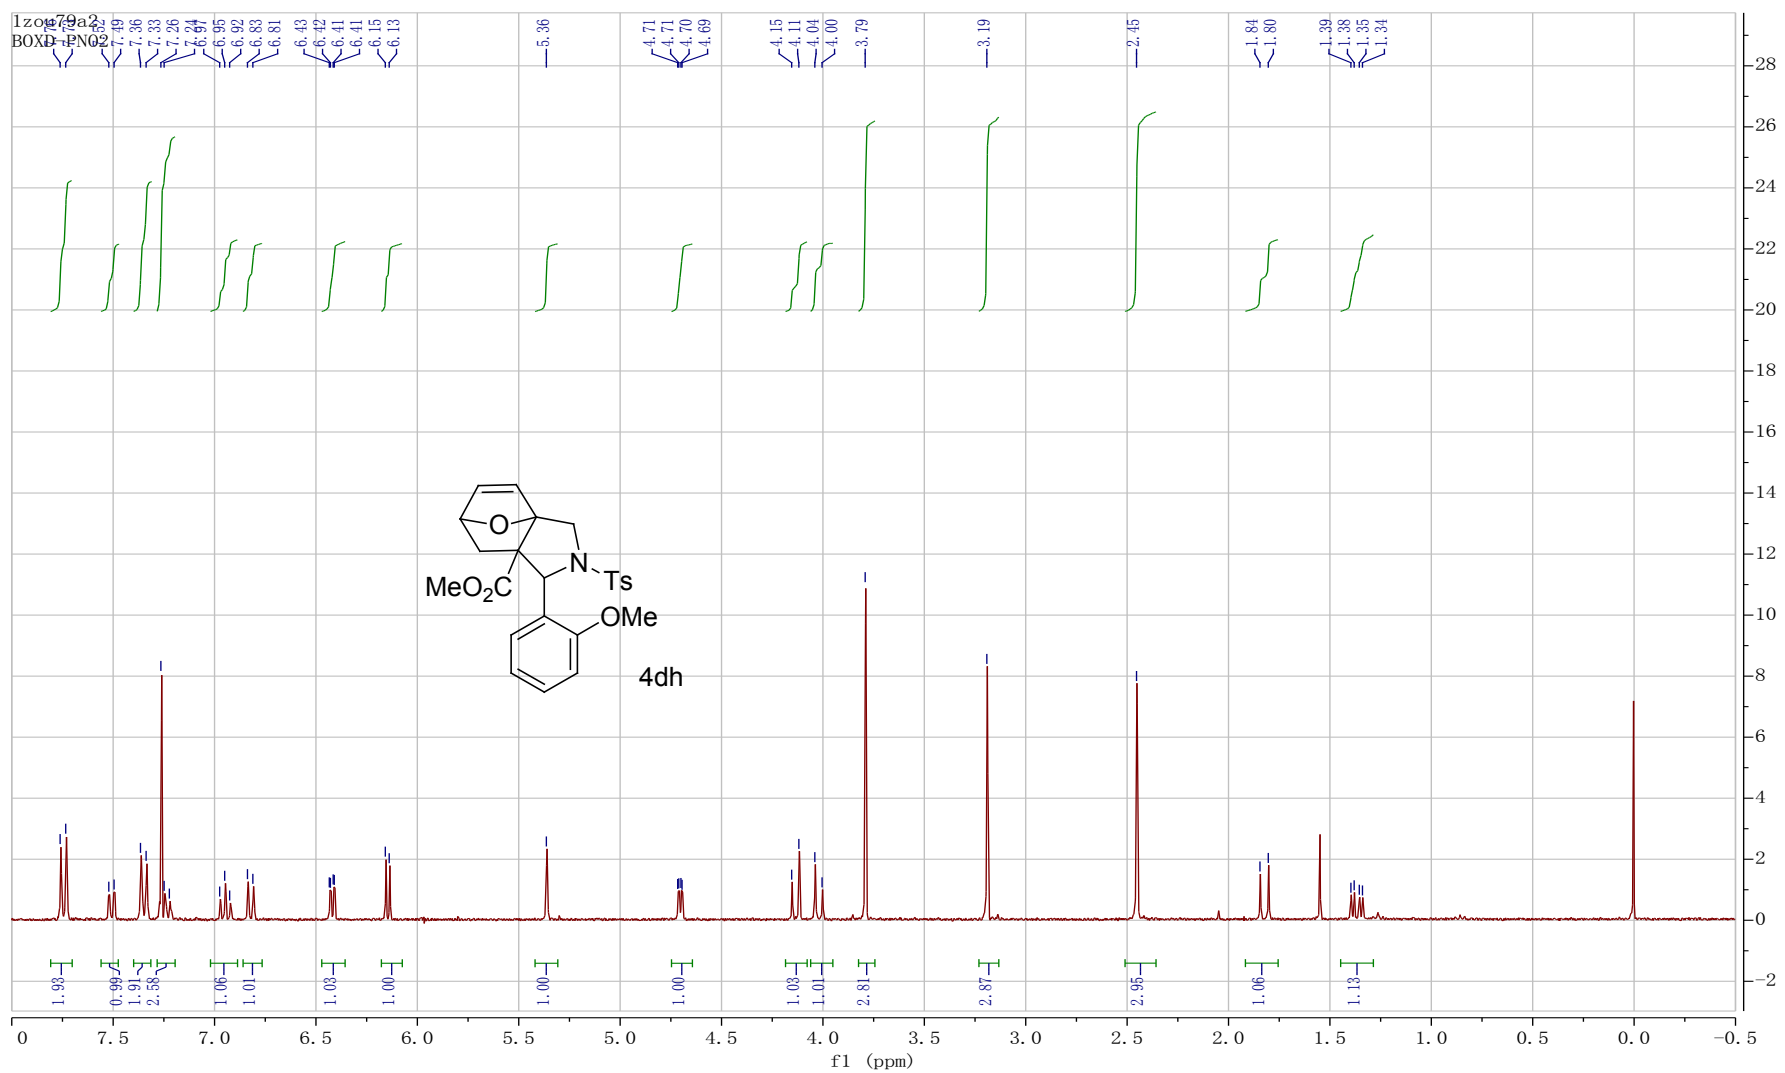

Spectra-68



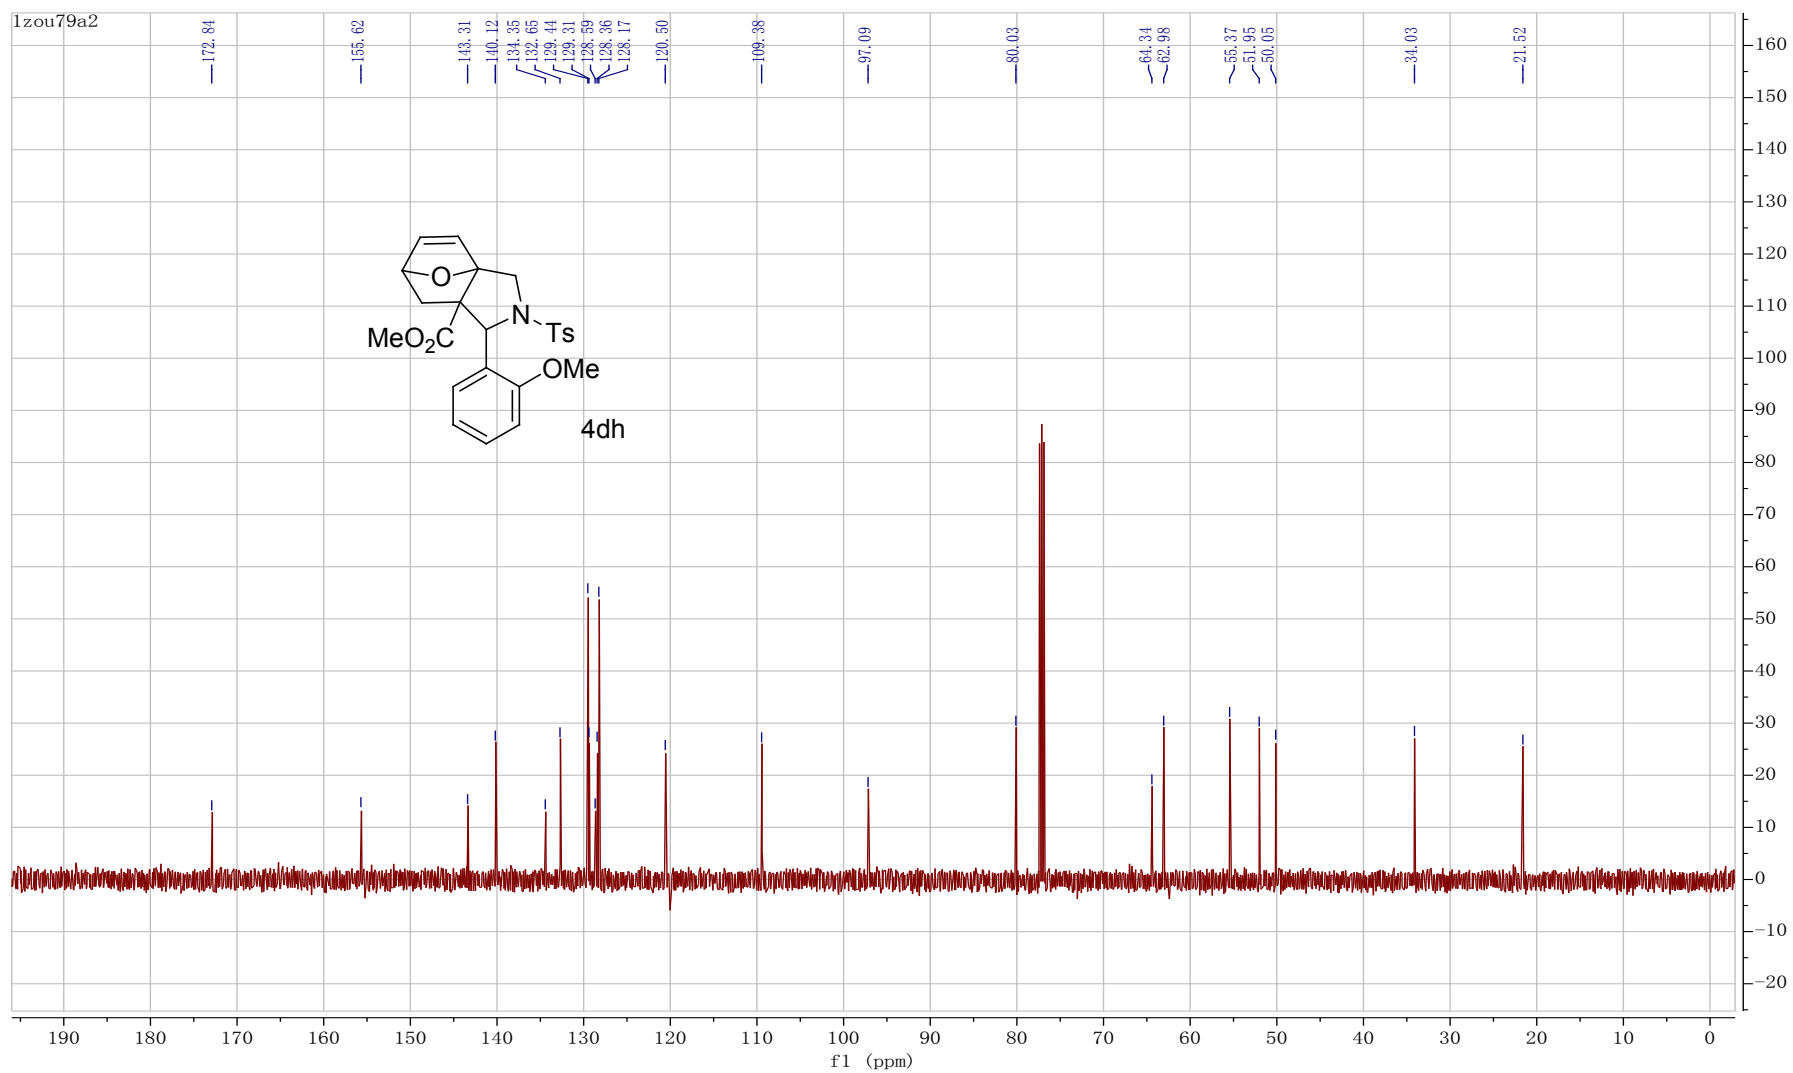

Spectra-69

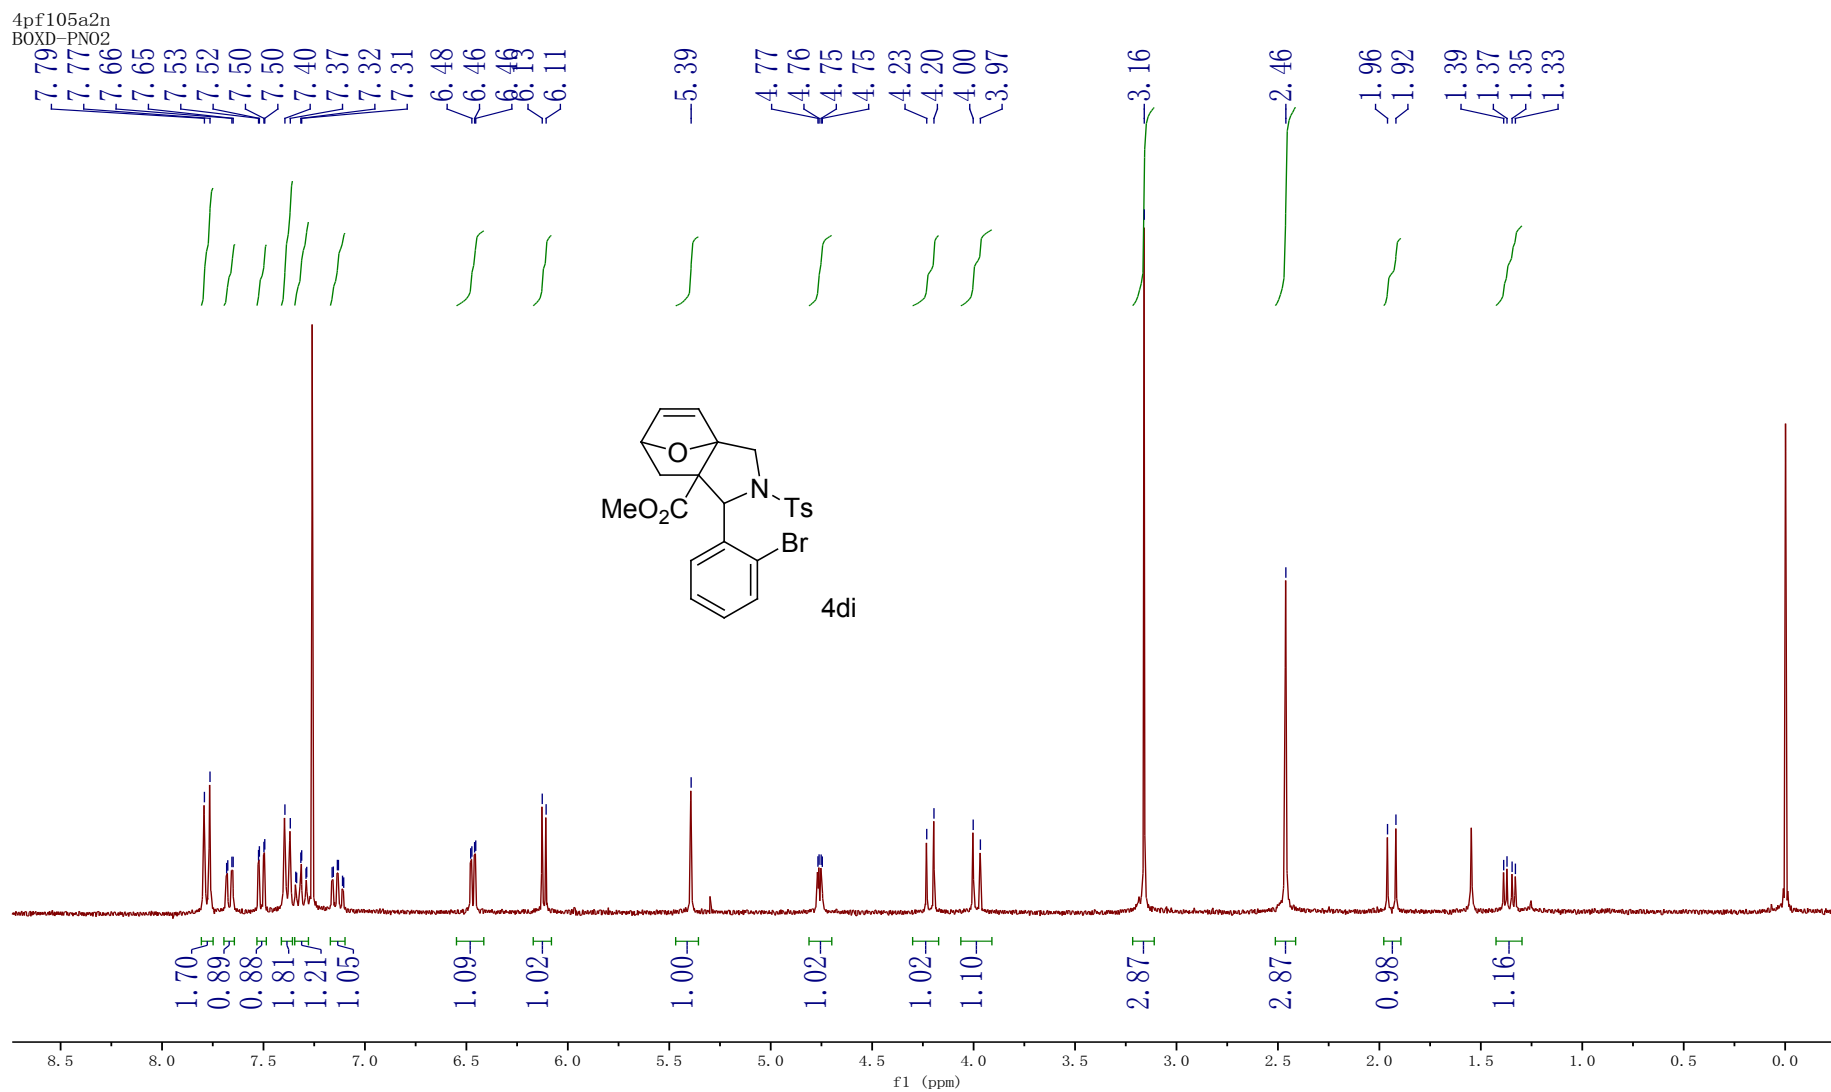

Spectra-70

4pf105ah-c

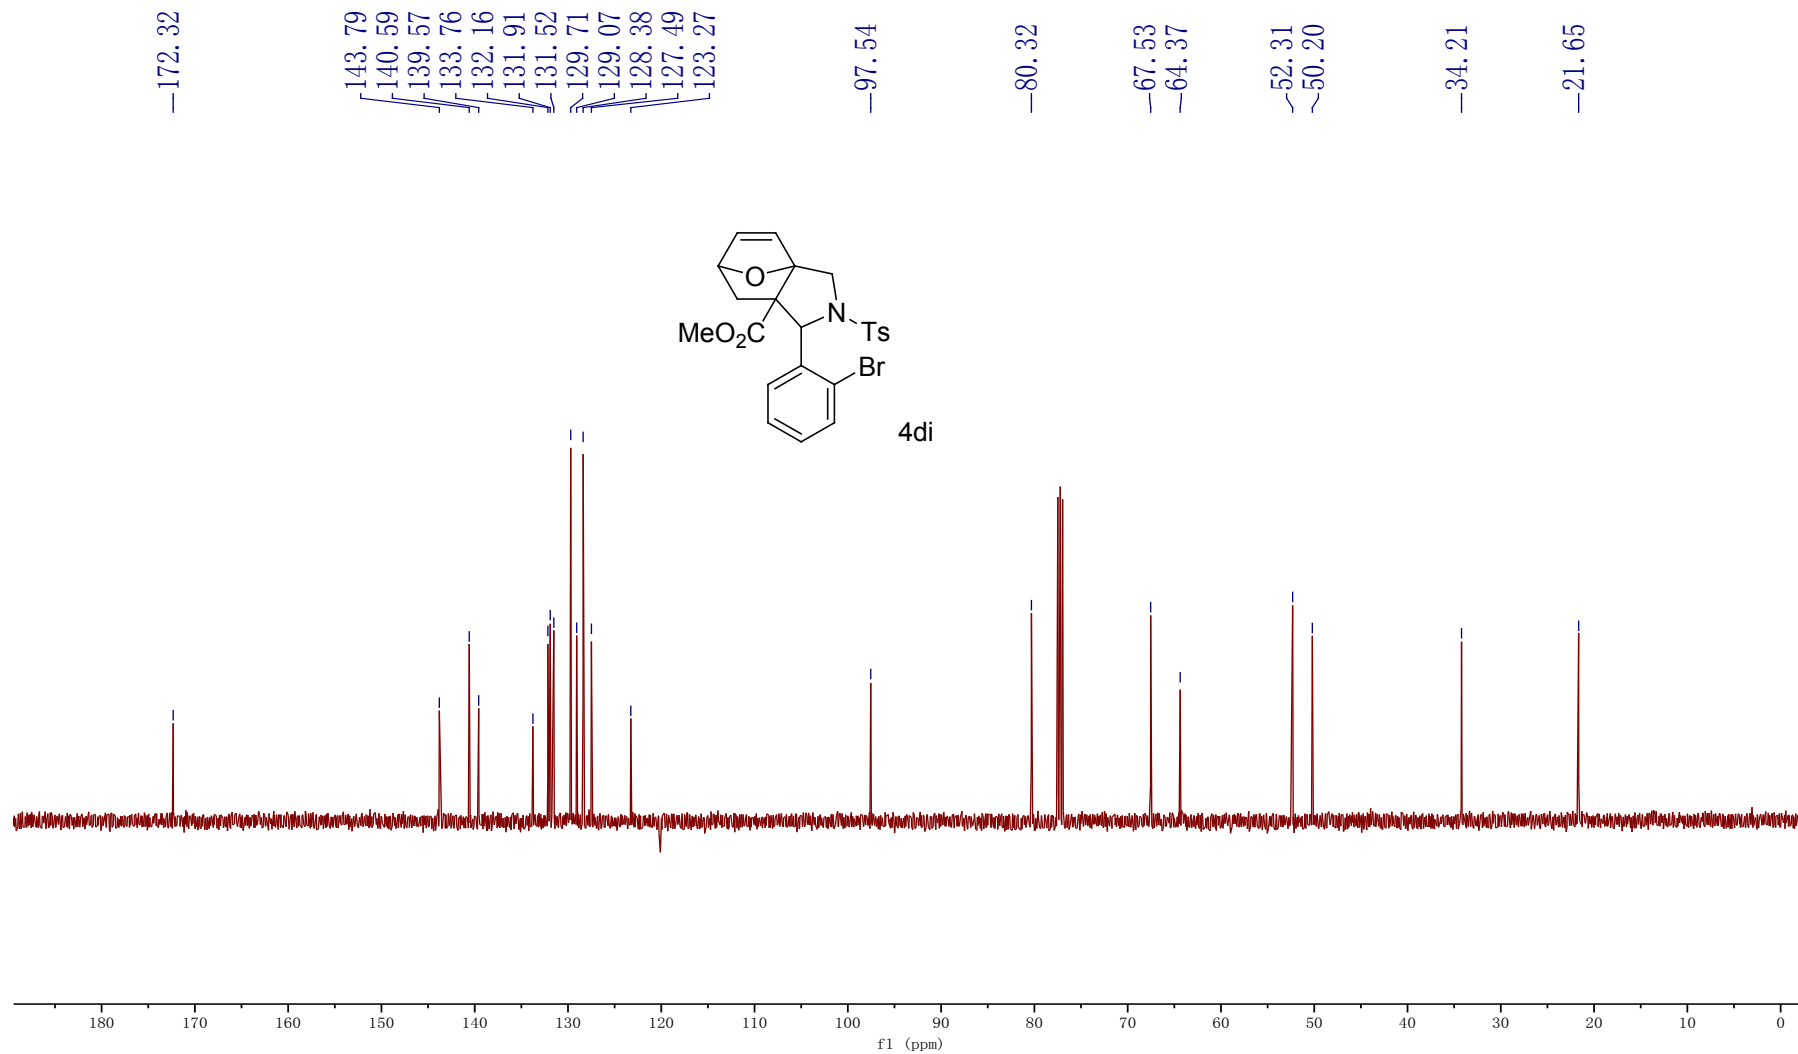

Spectra-71

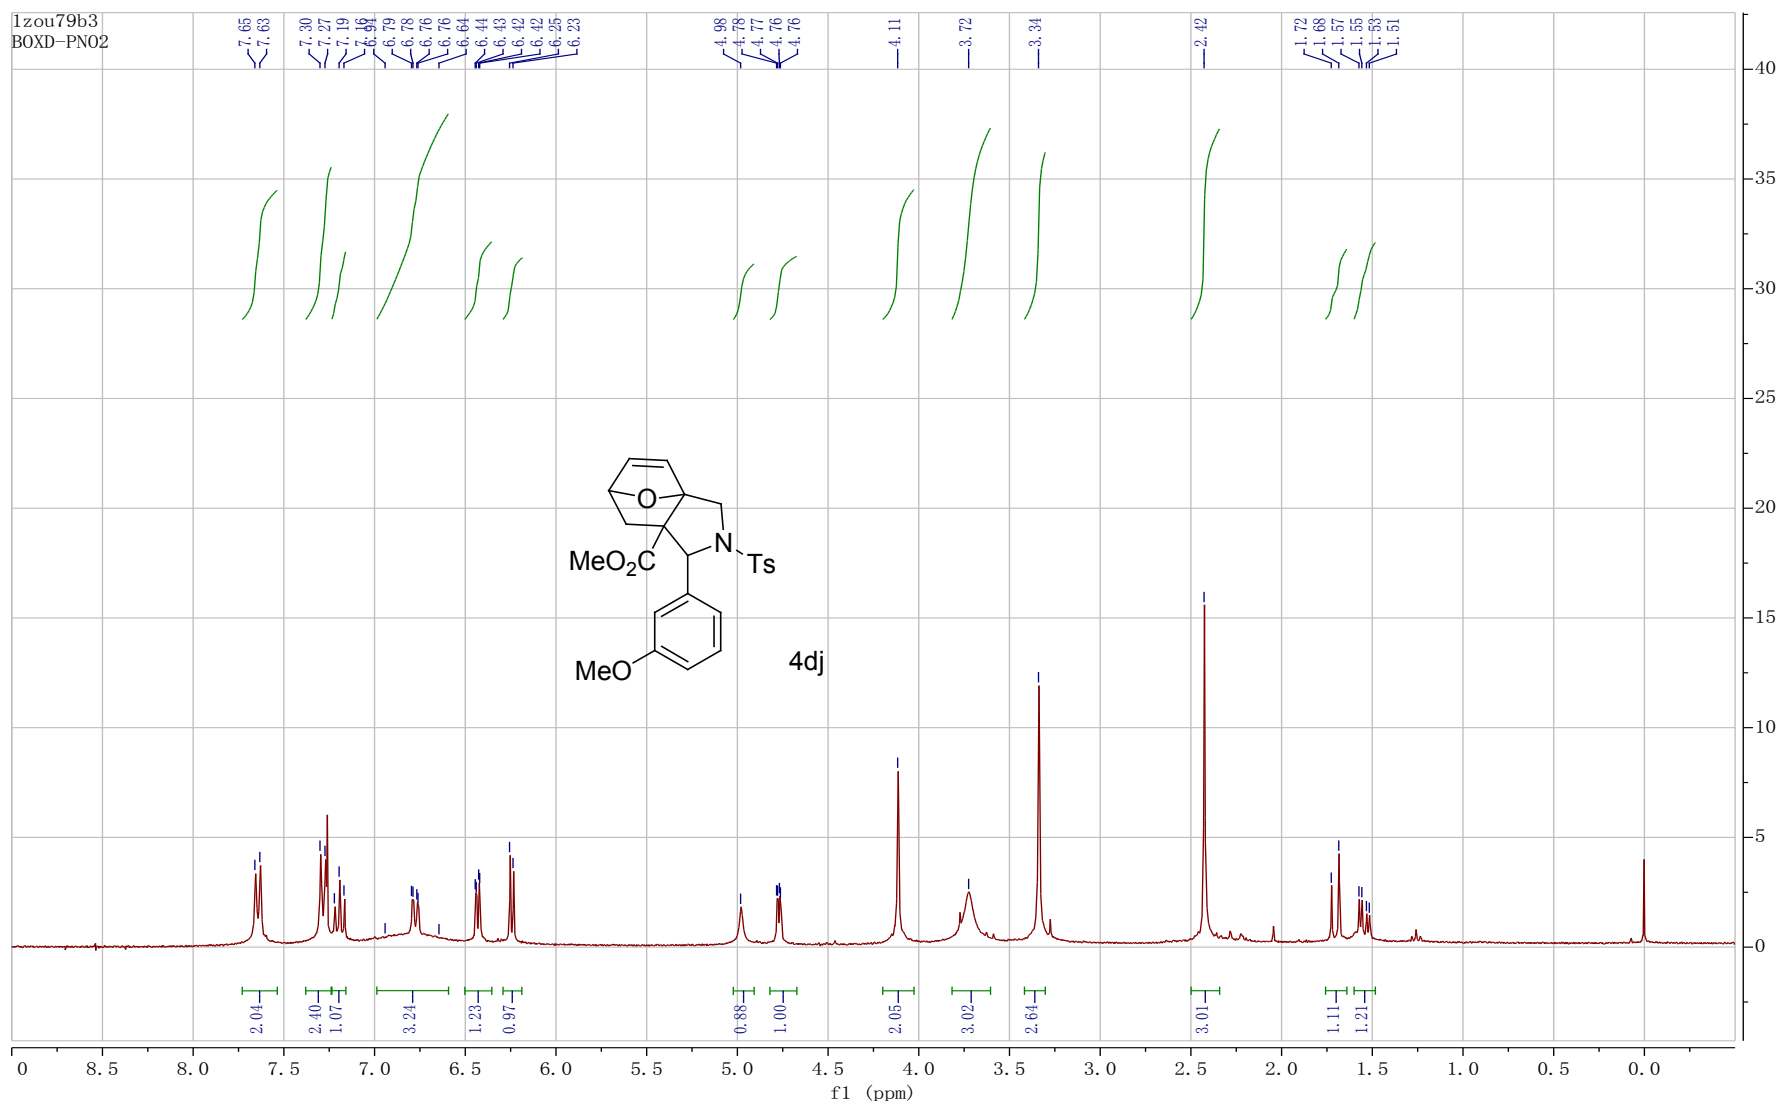

Spectra-72

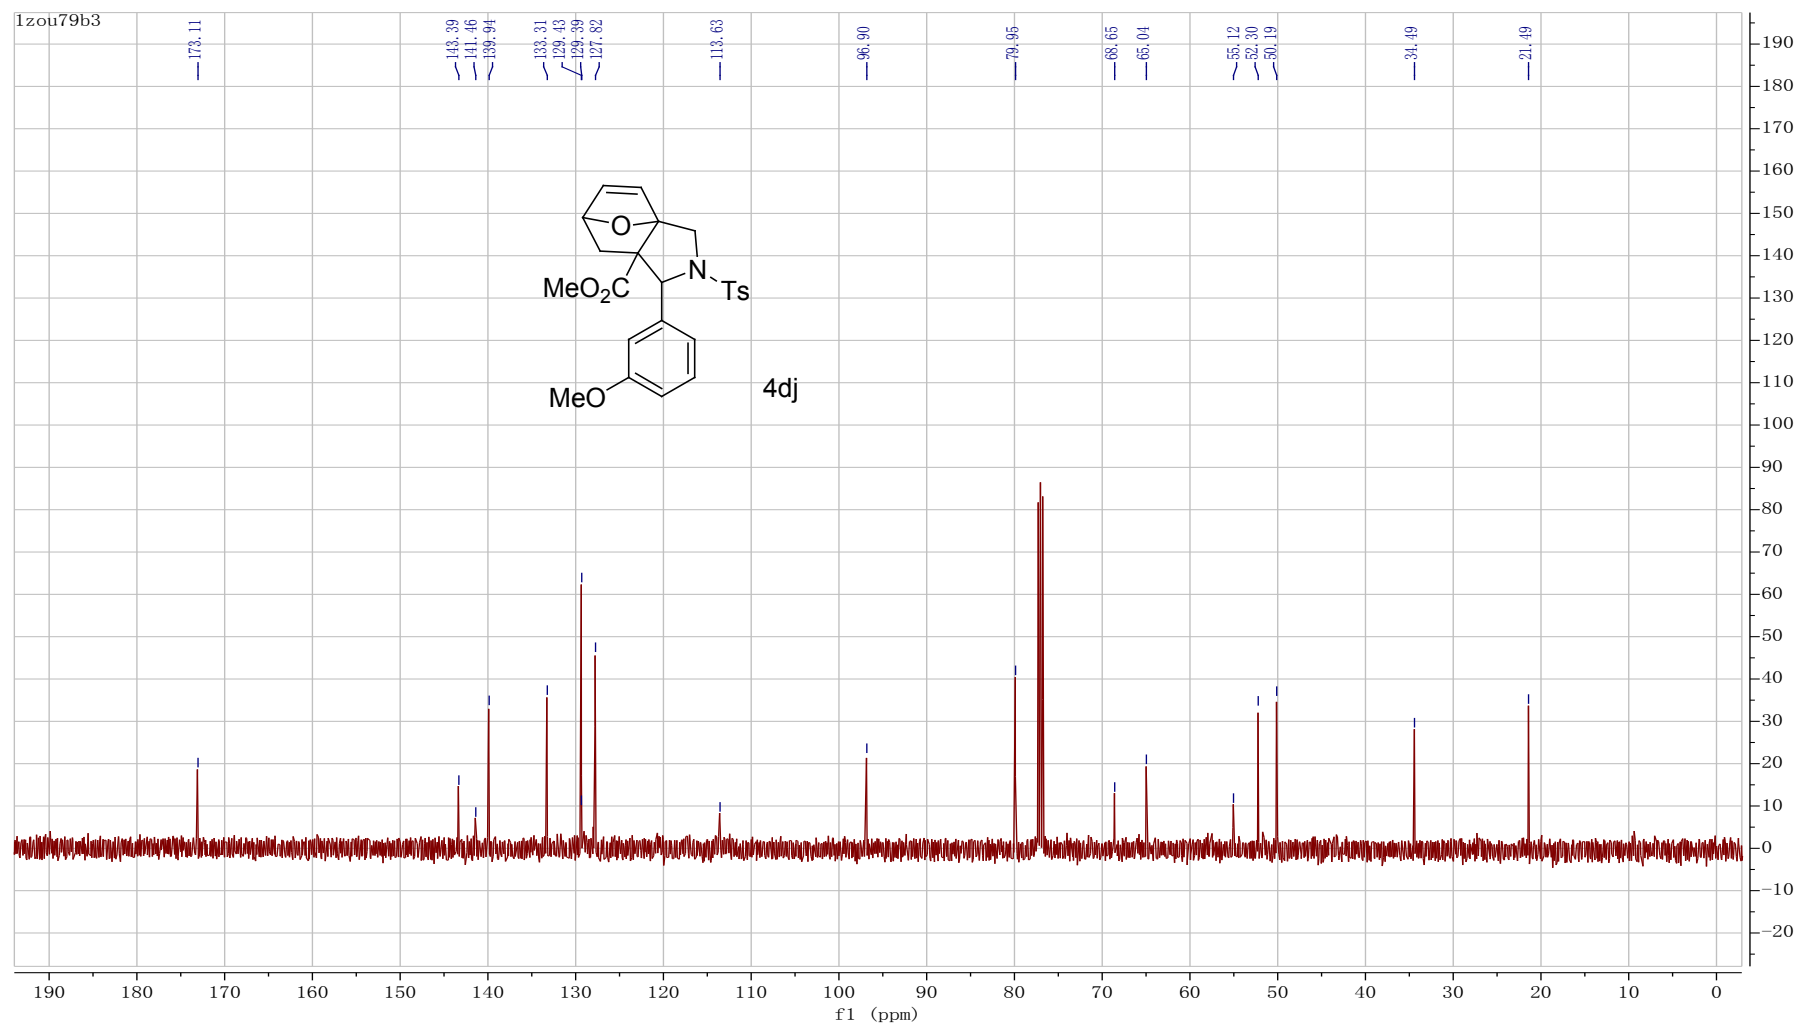

Spectra-73

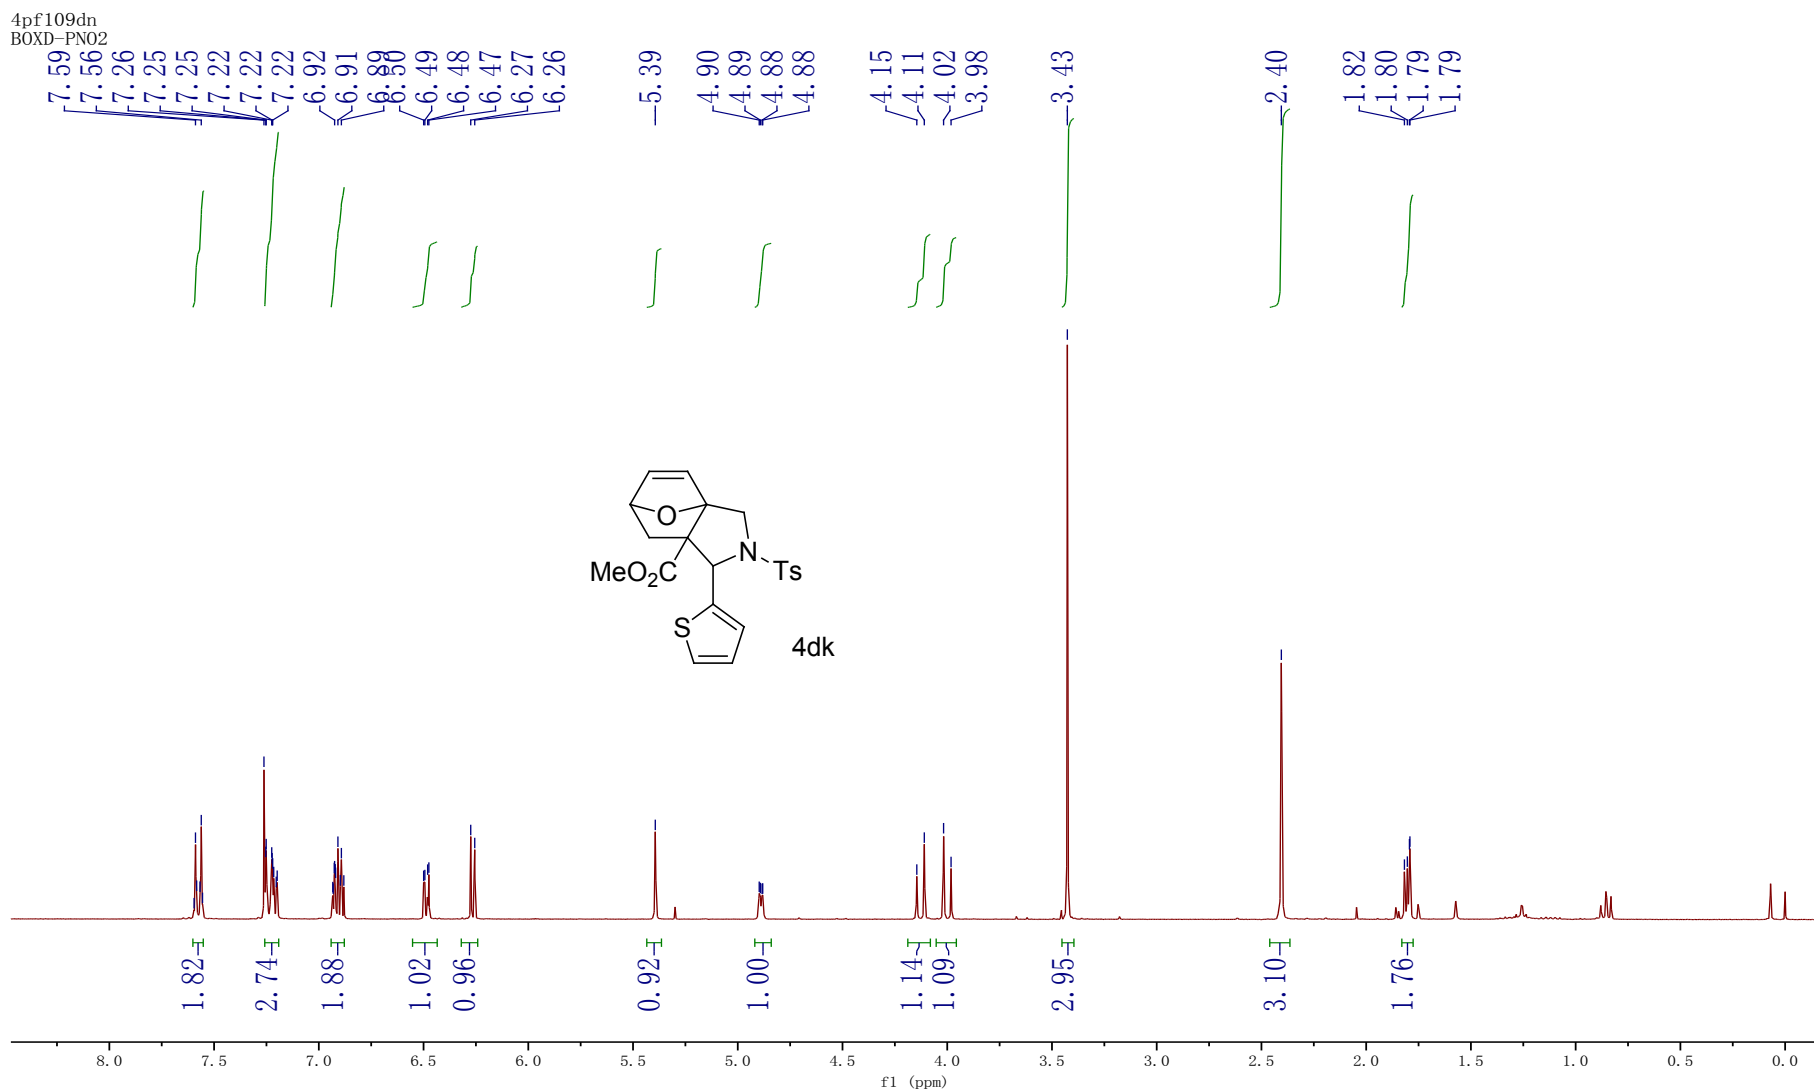

Spectra-74

4pf109dn-c

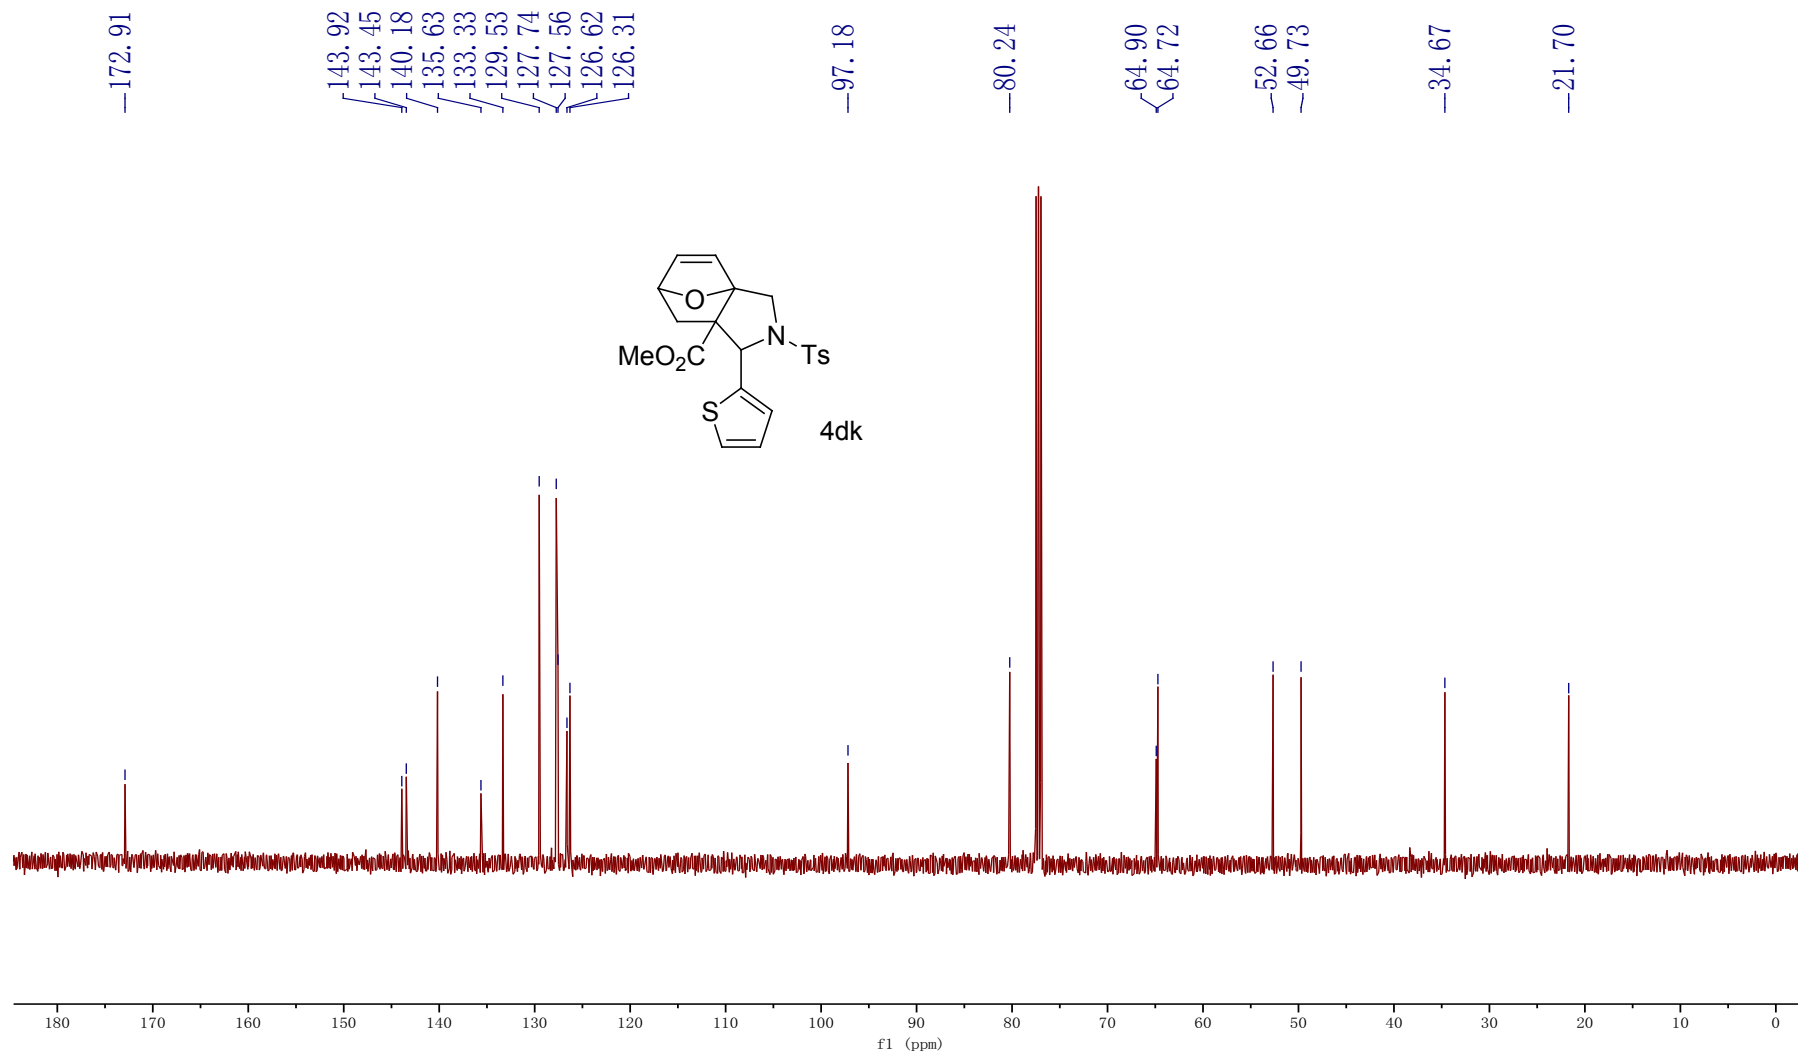

Spectra-75

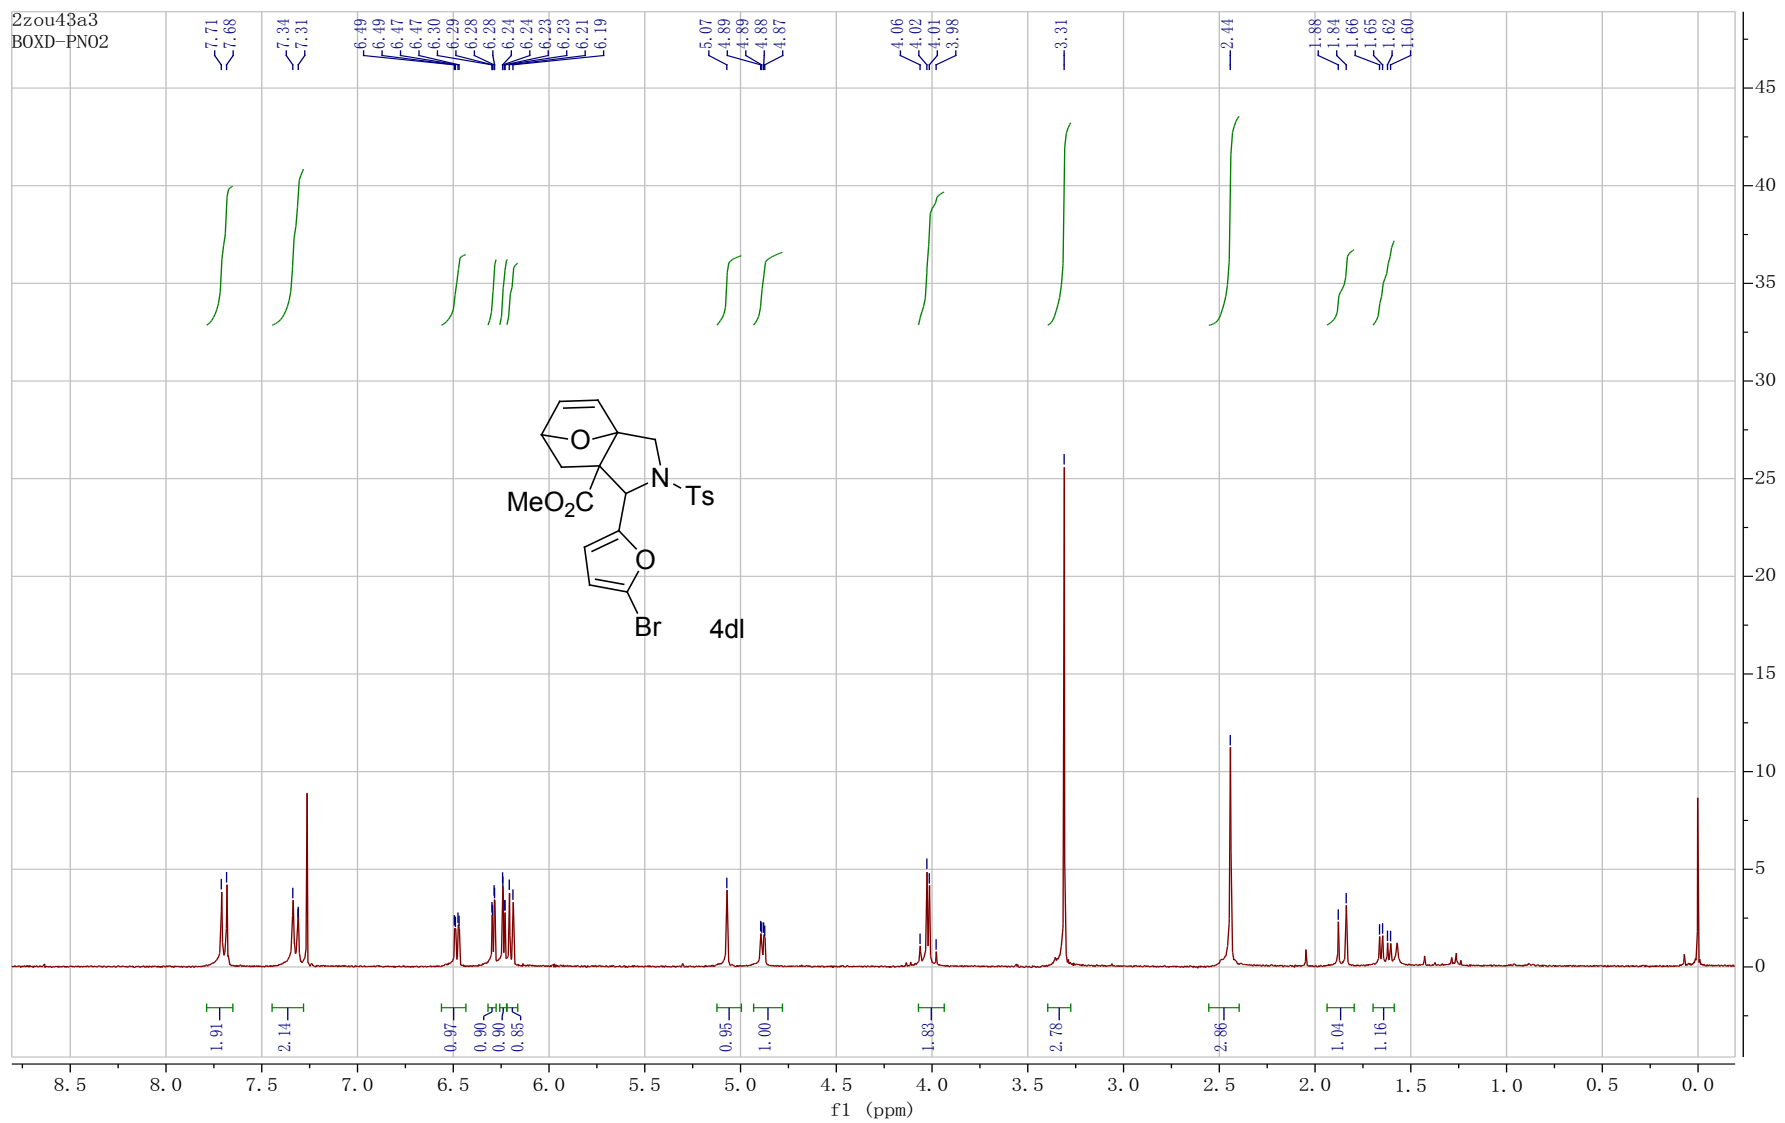

Spectra-76



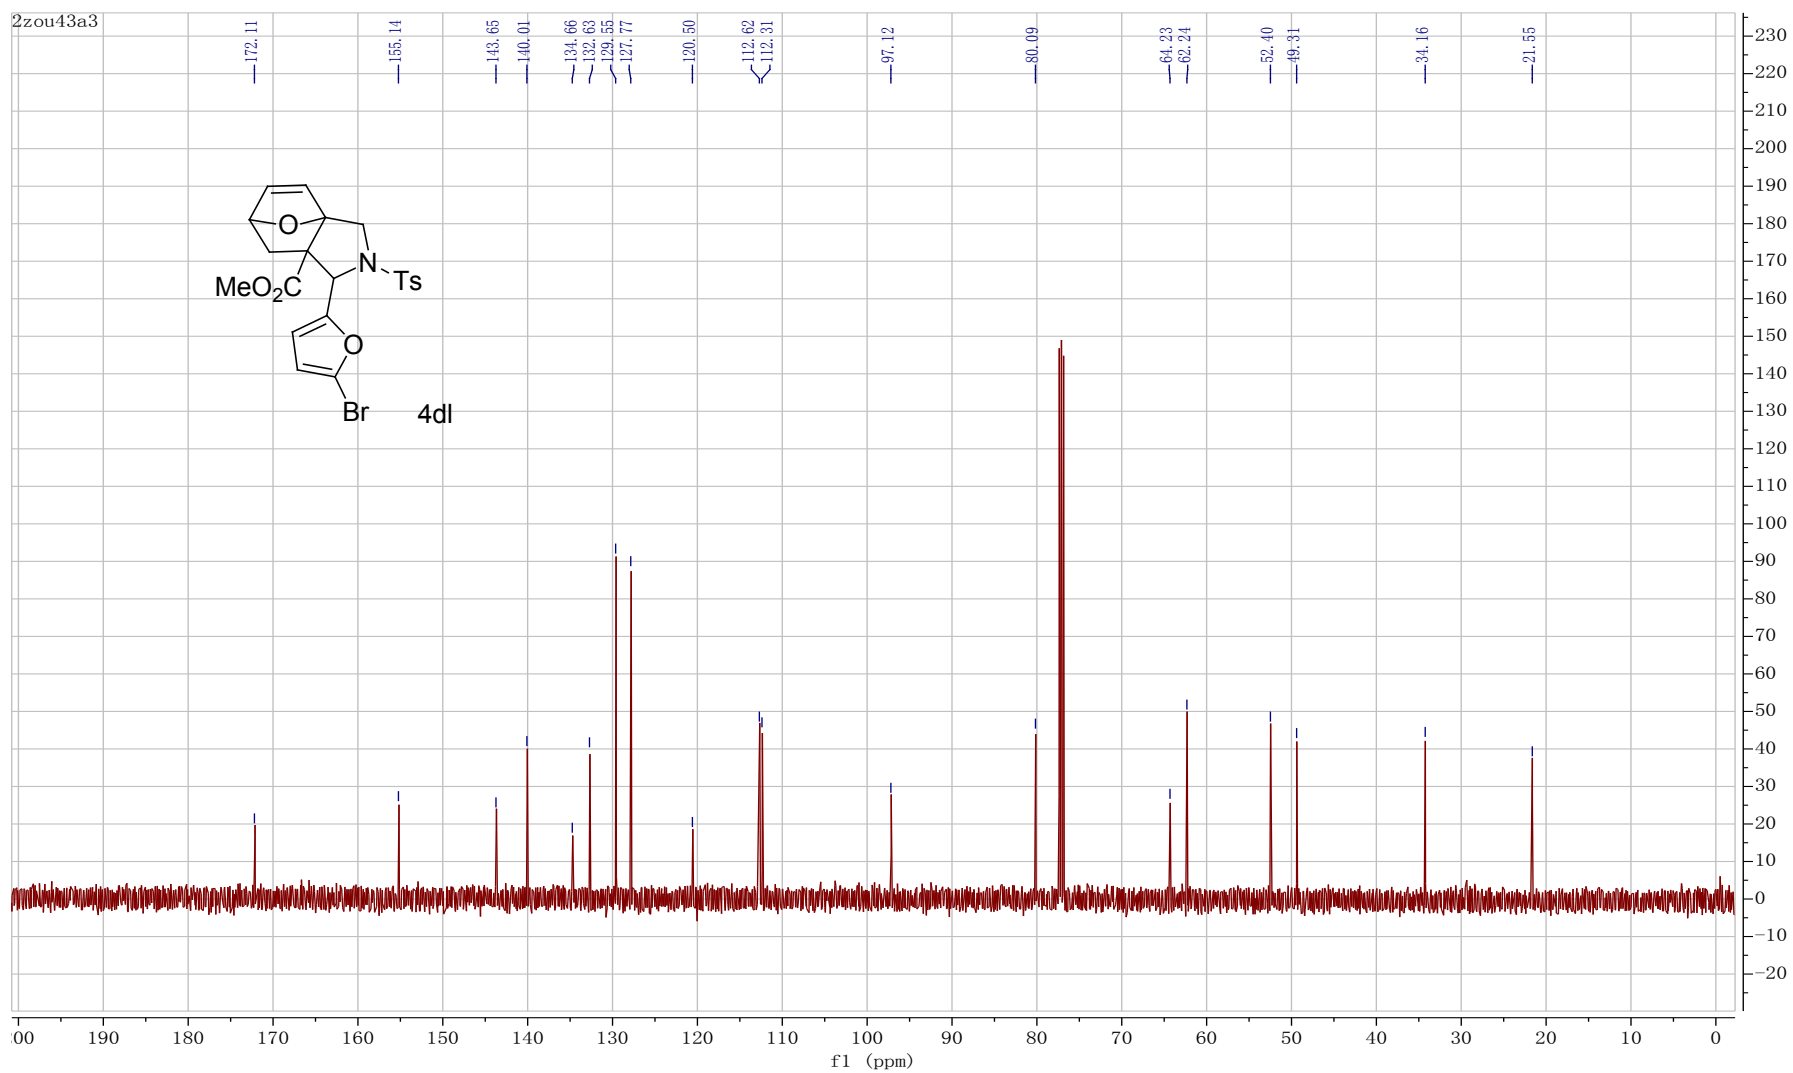

Spectra-77

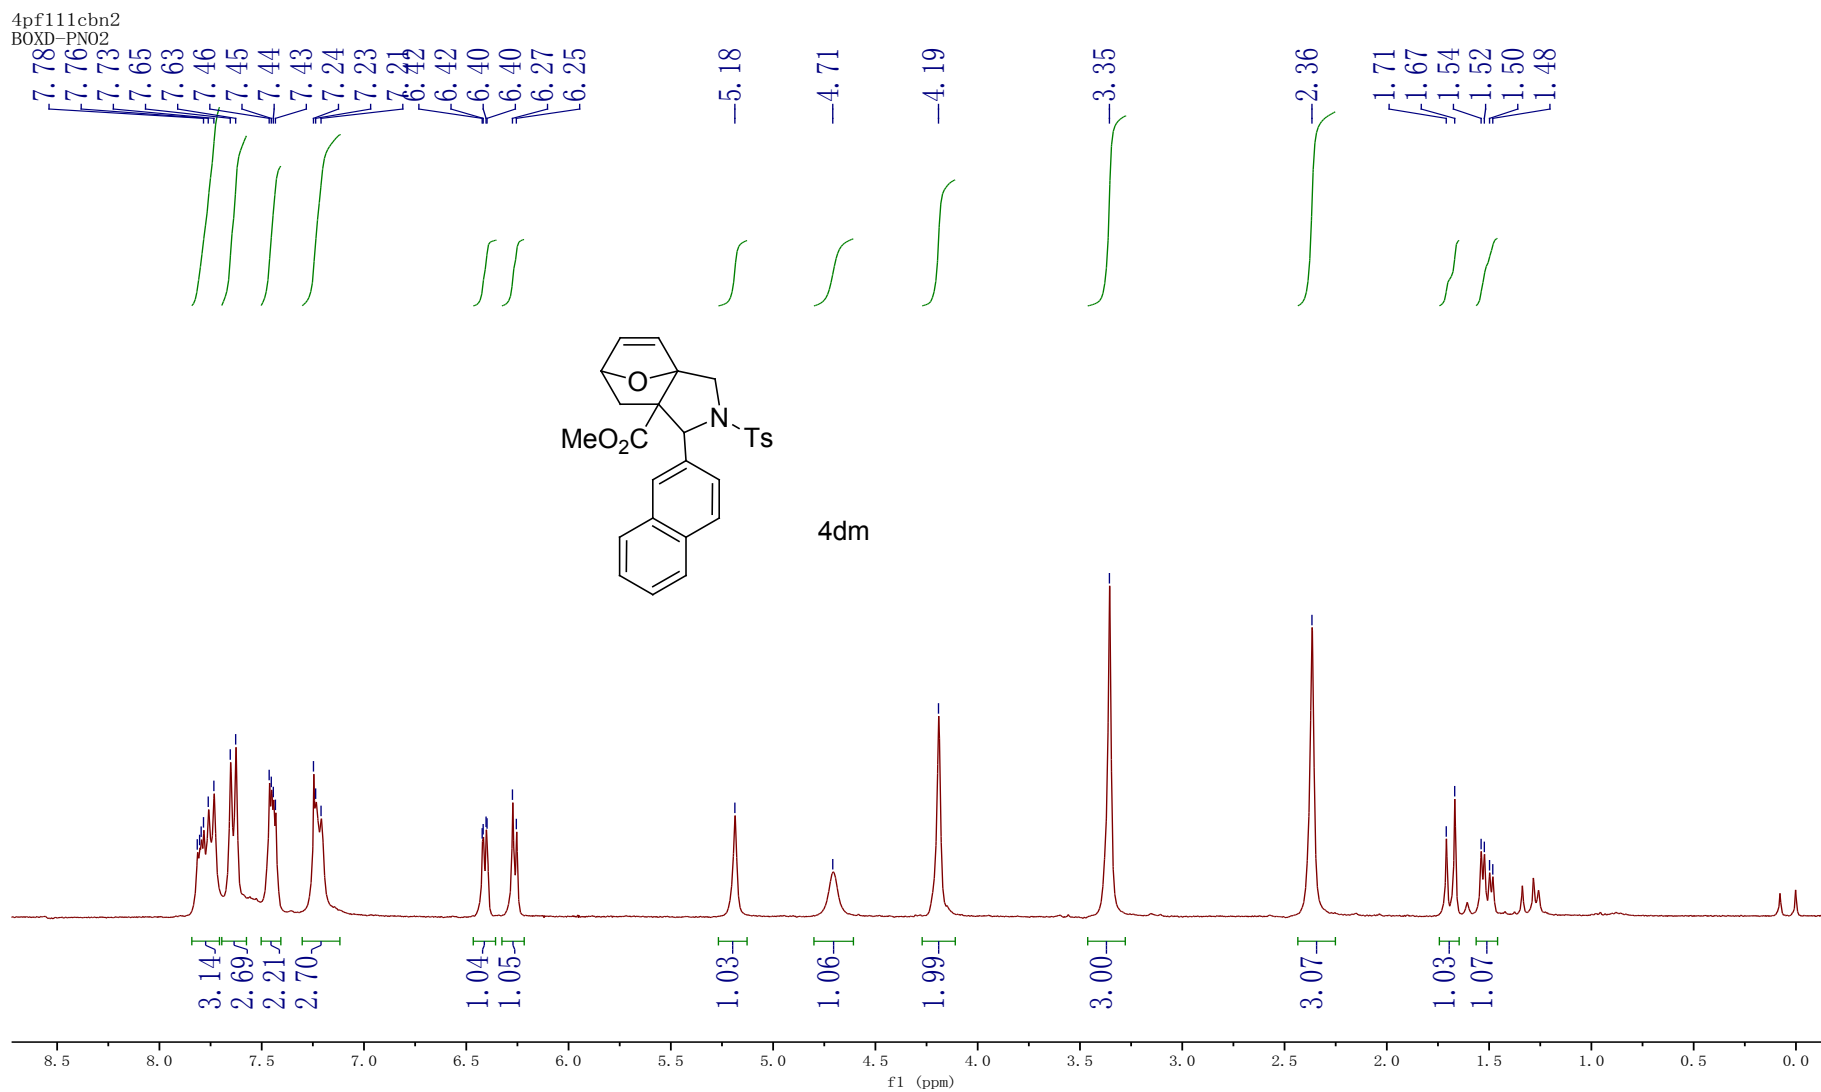

Spectra-78

4pf111c-en

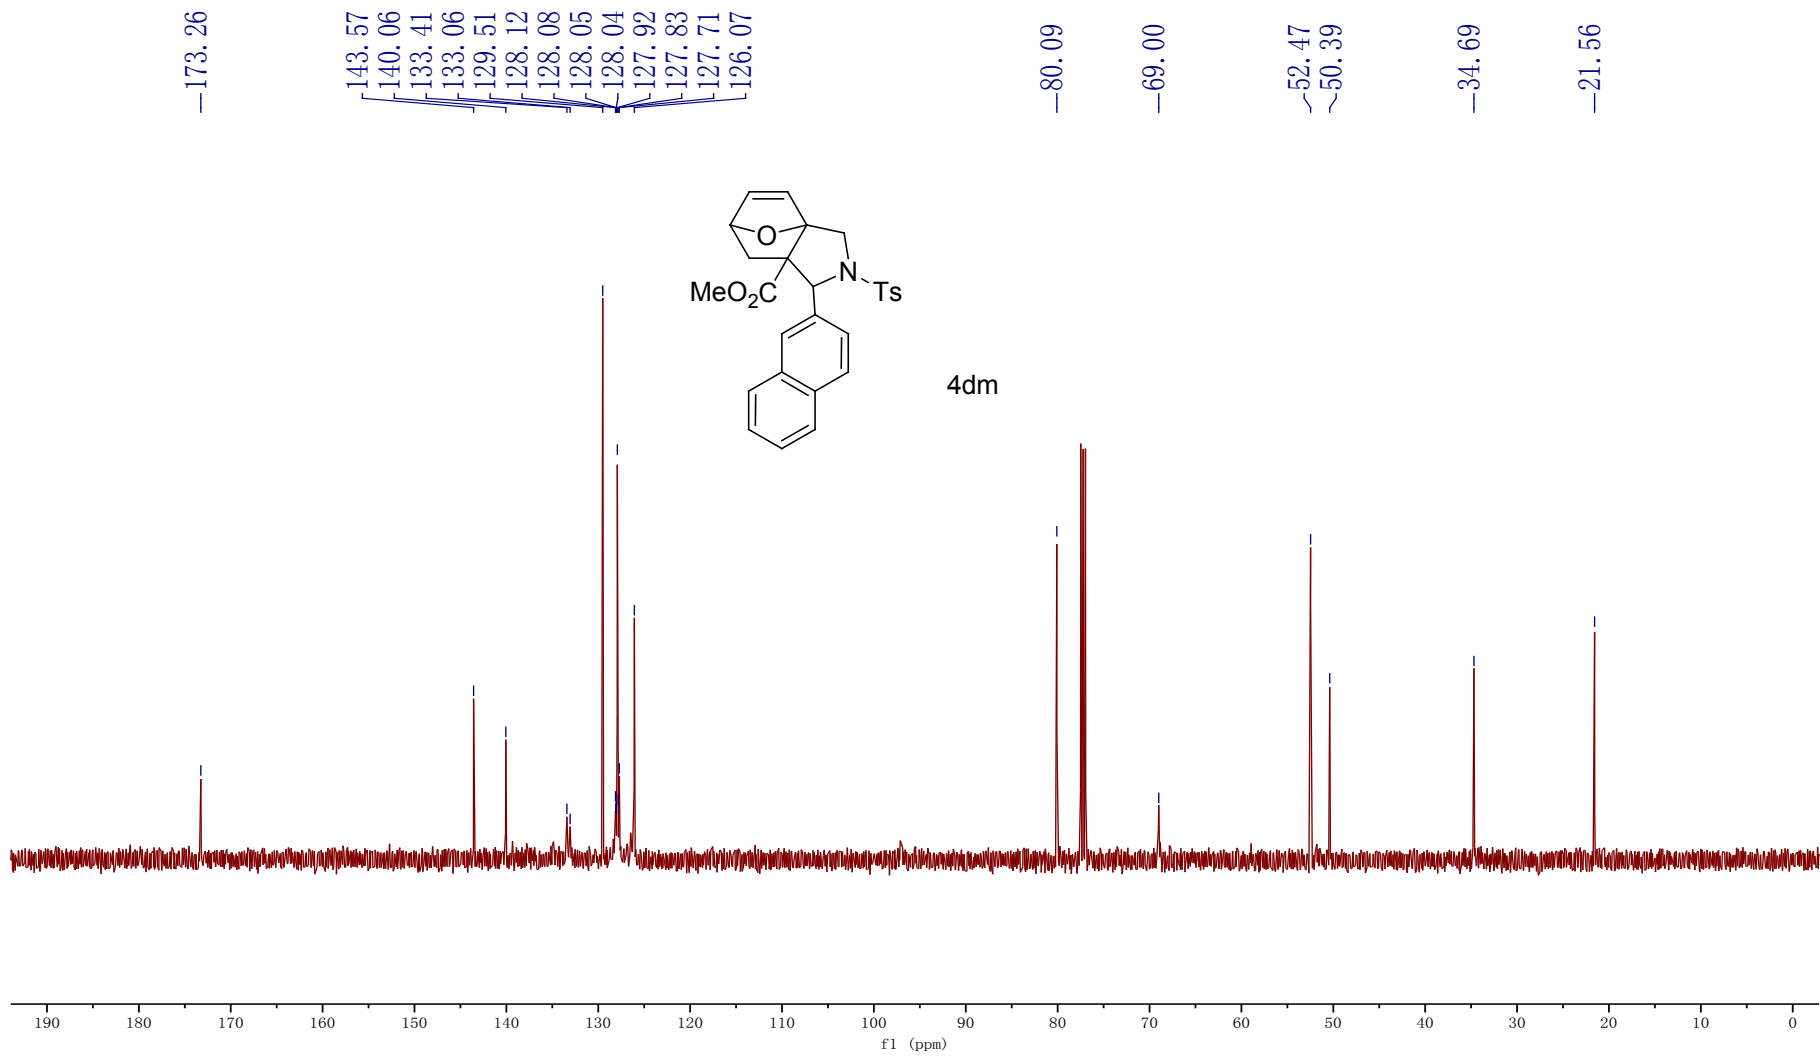

Spectra-79

4pf122a

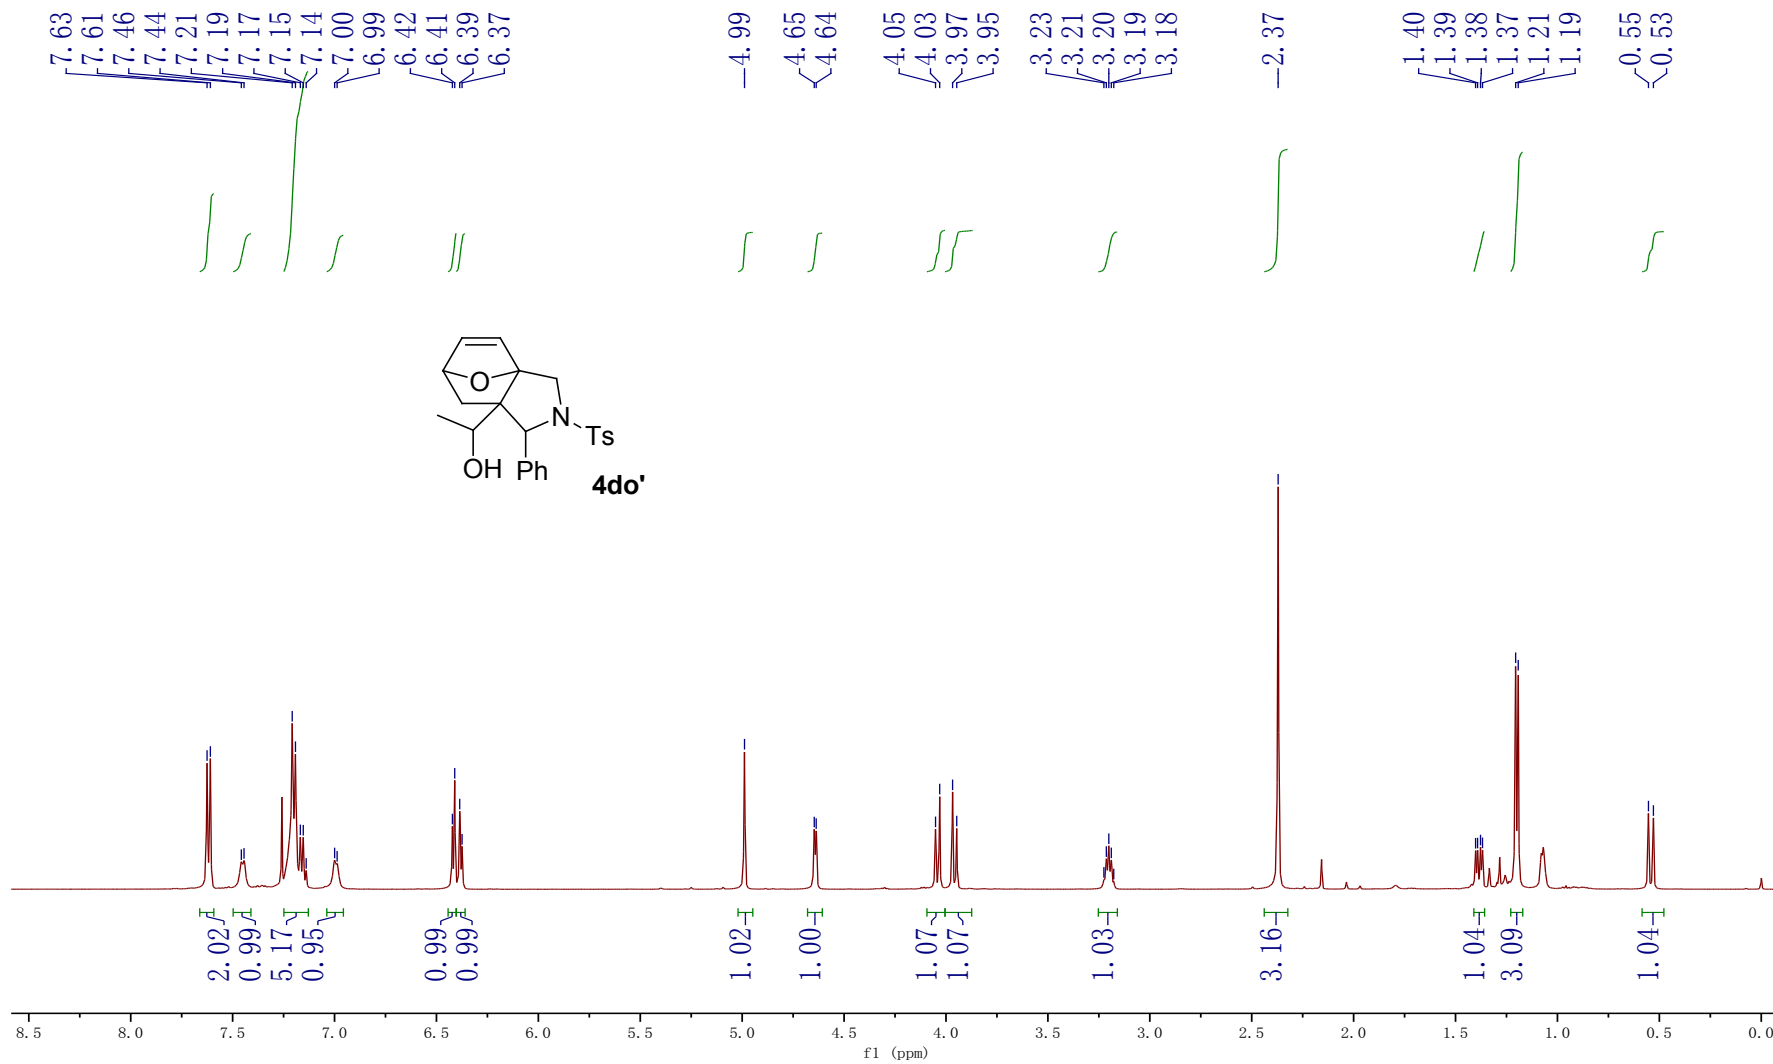

Spectra-80

4pf122a-C

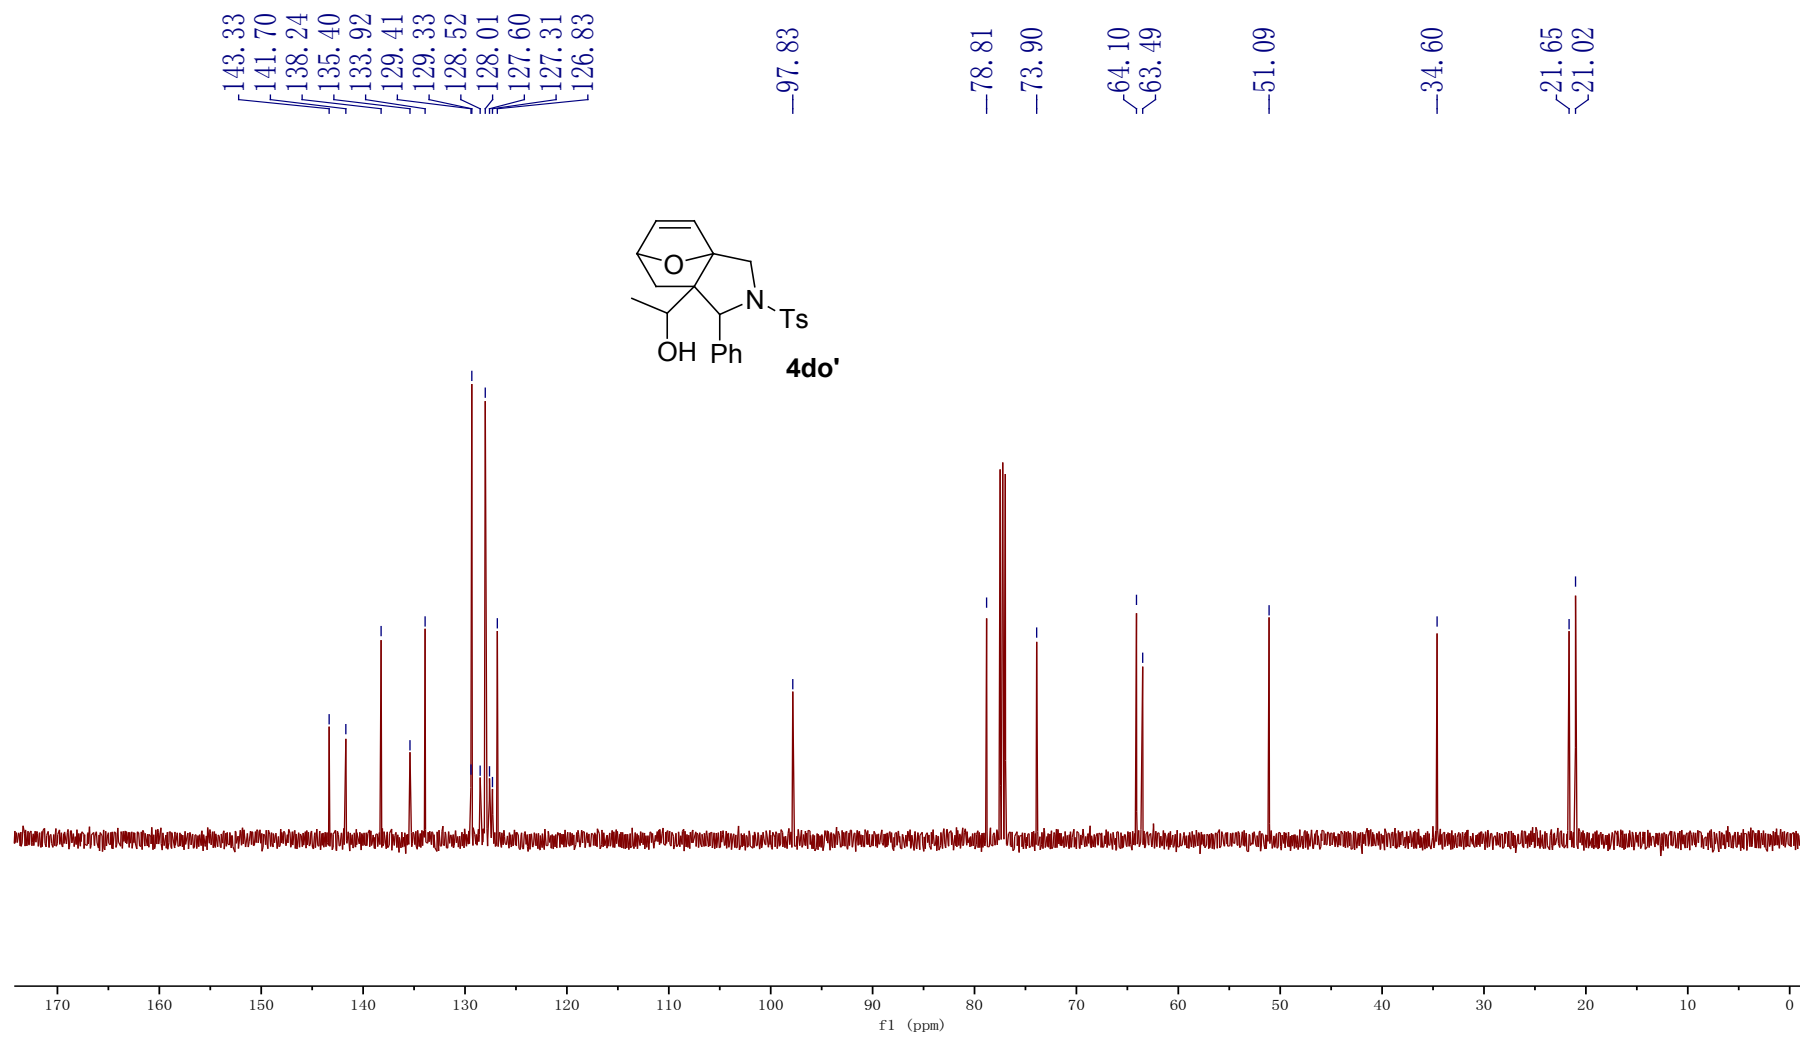

Spectra-81

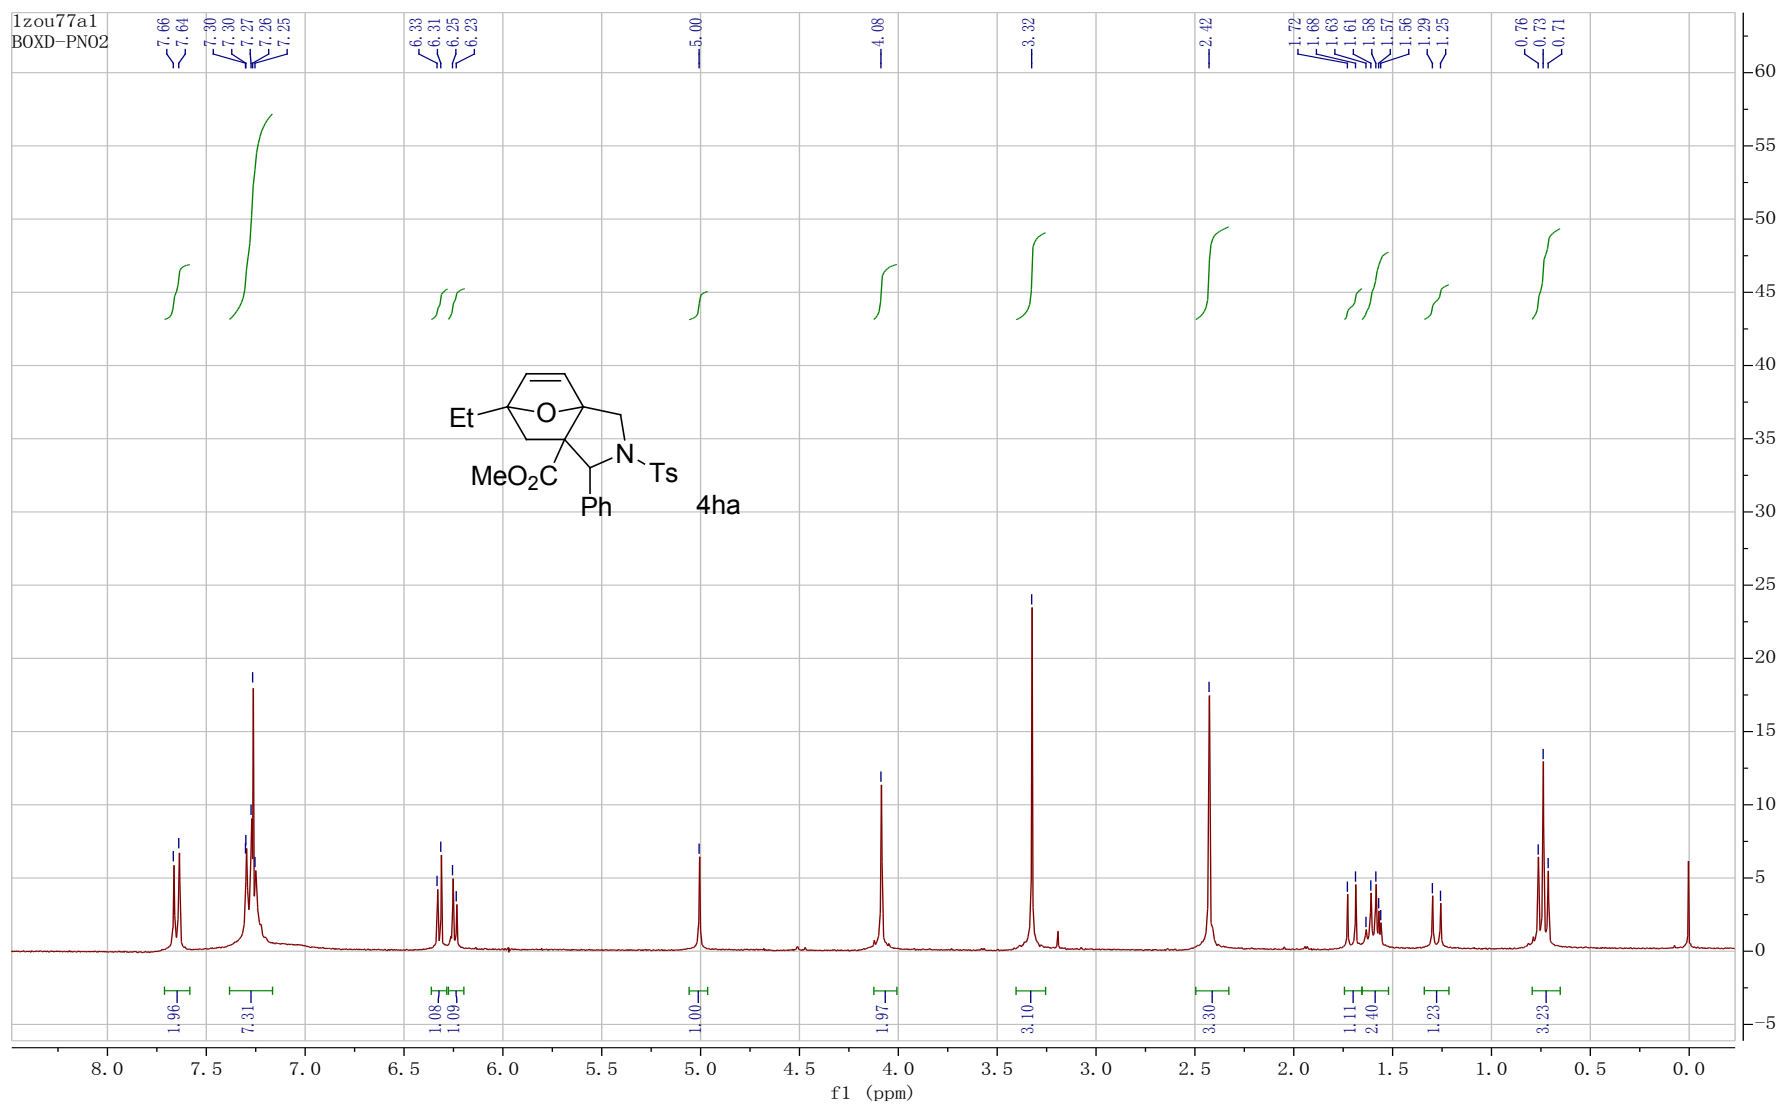

Spectra-82

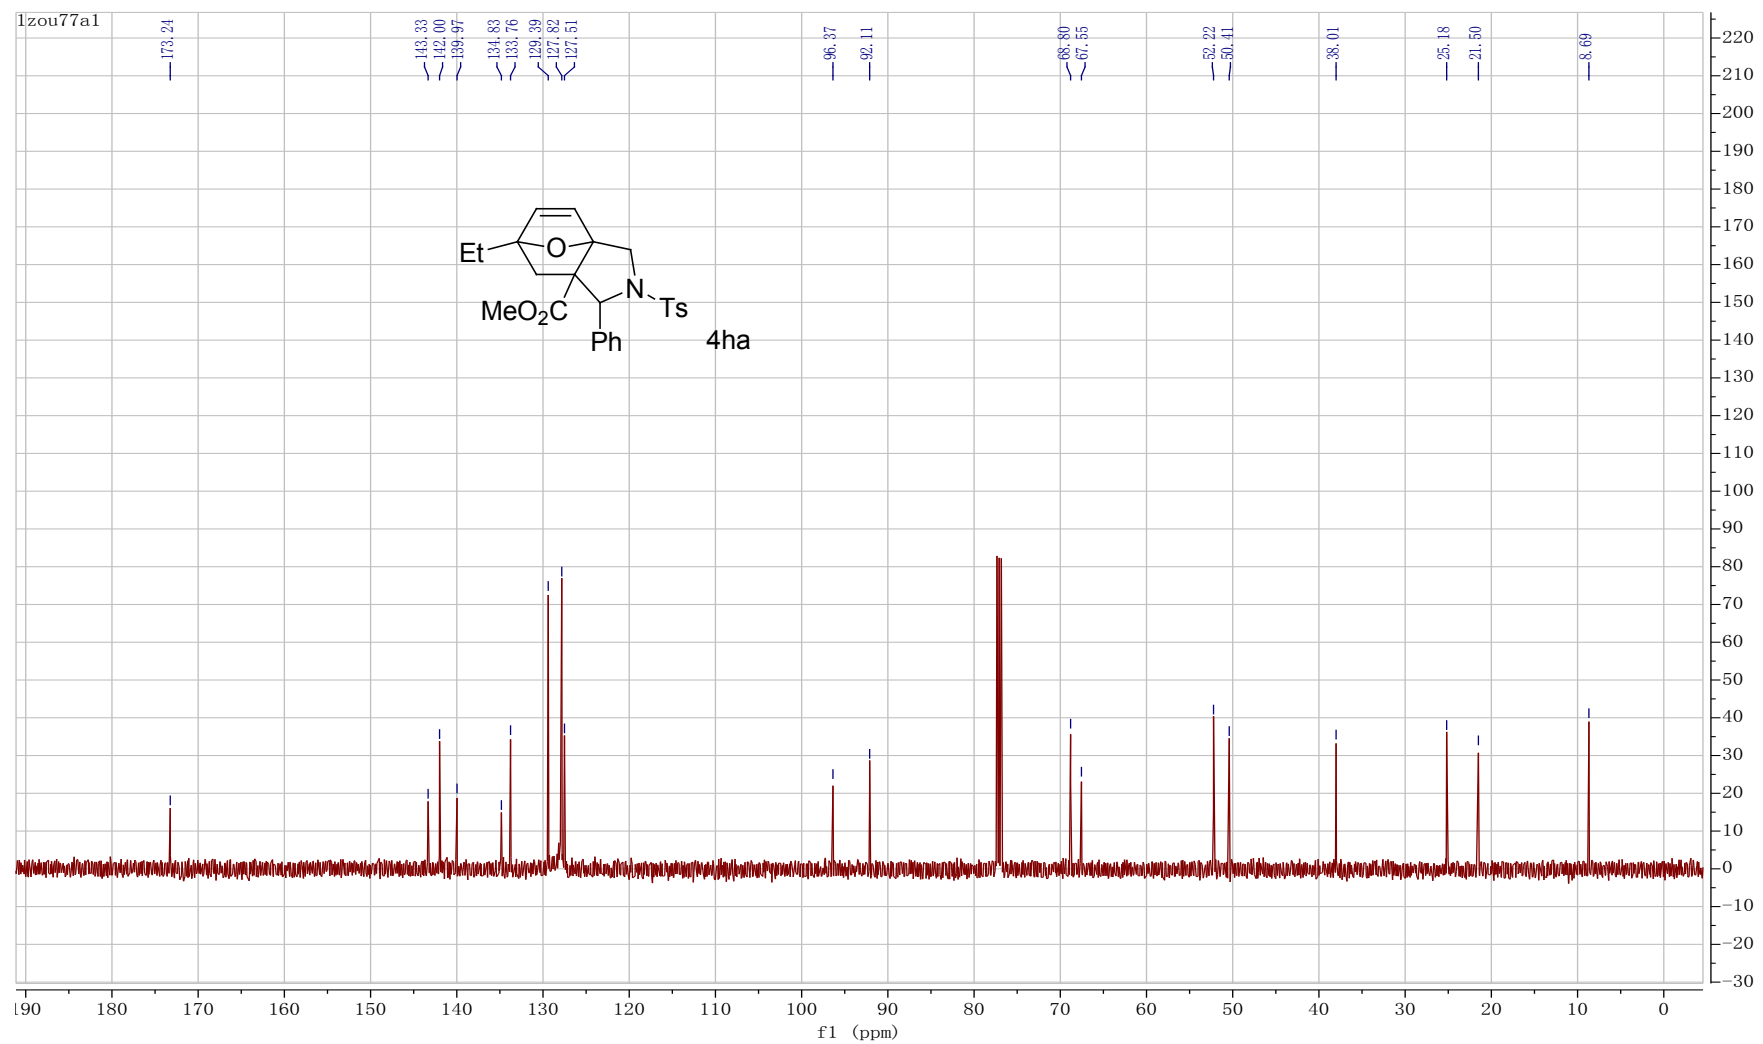

Spectra-83

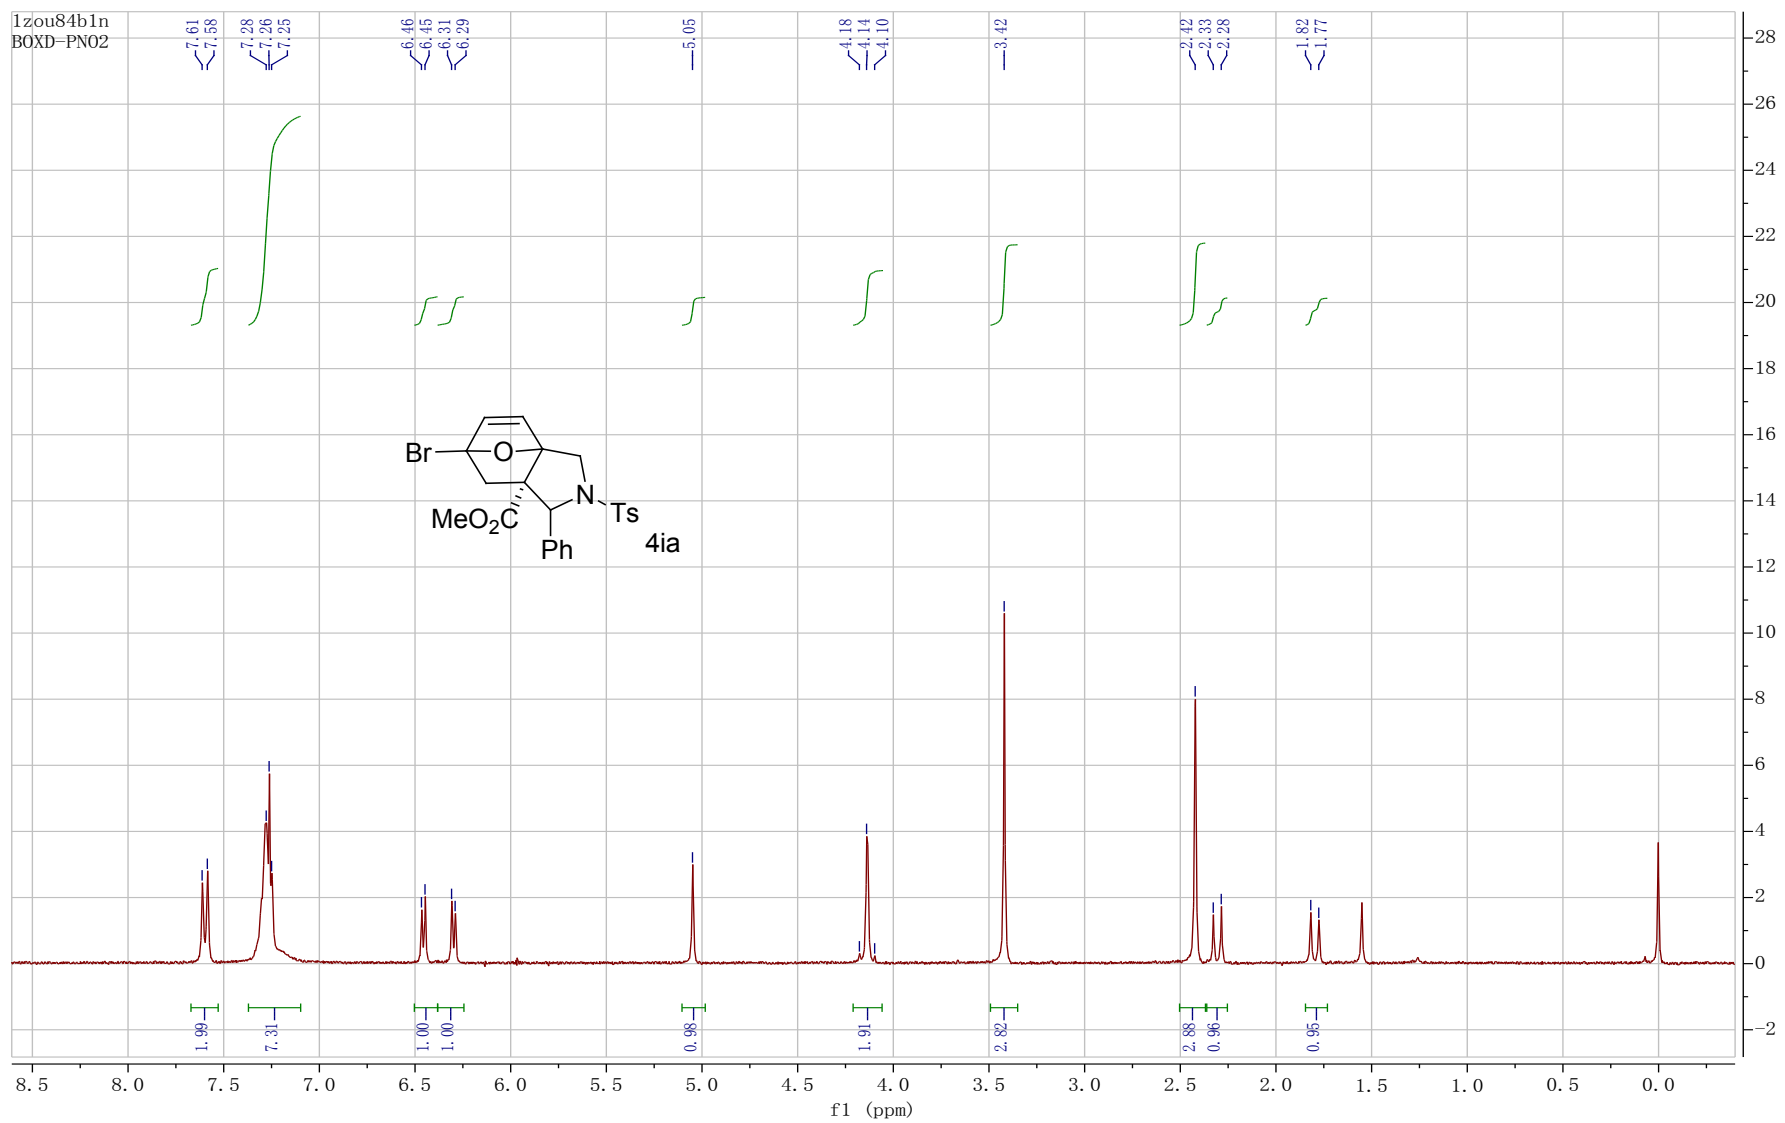

Spectra-84



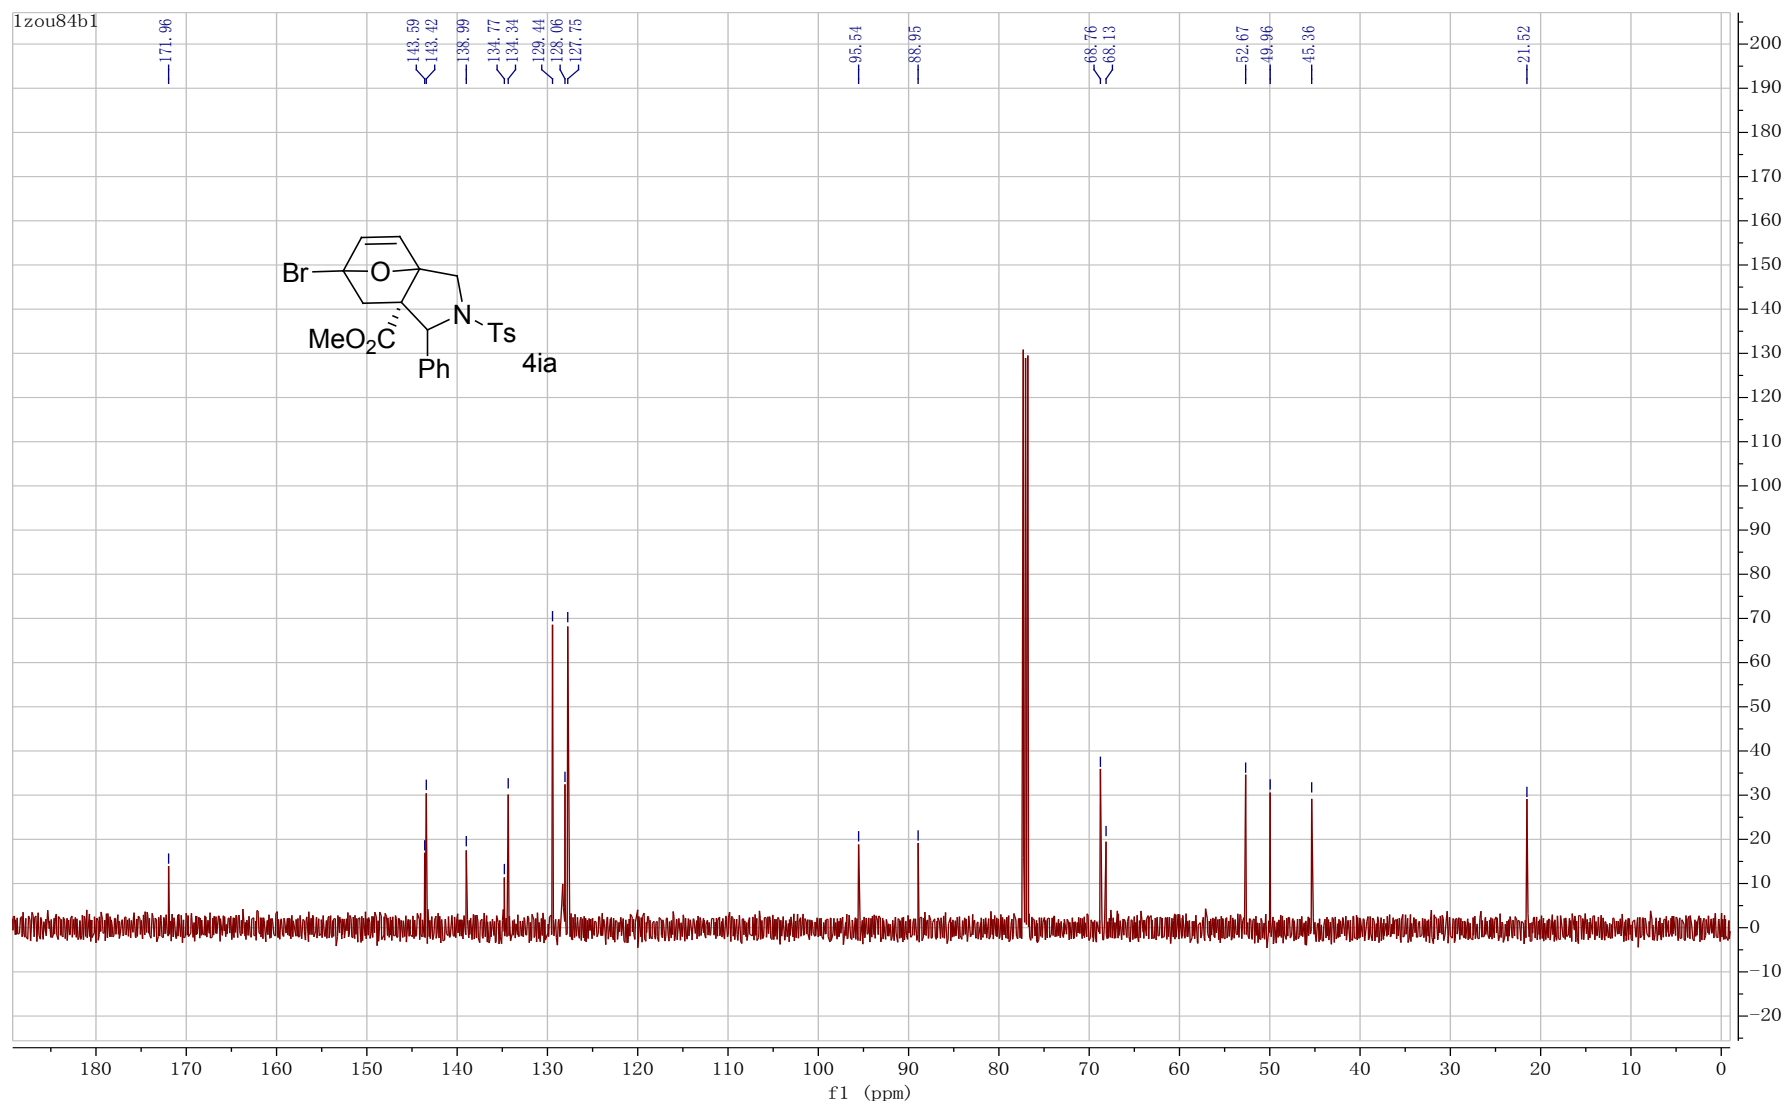

Spectra-85

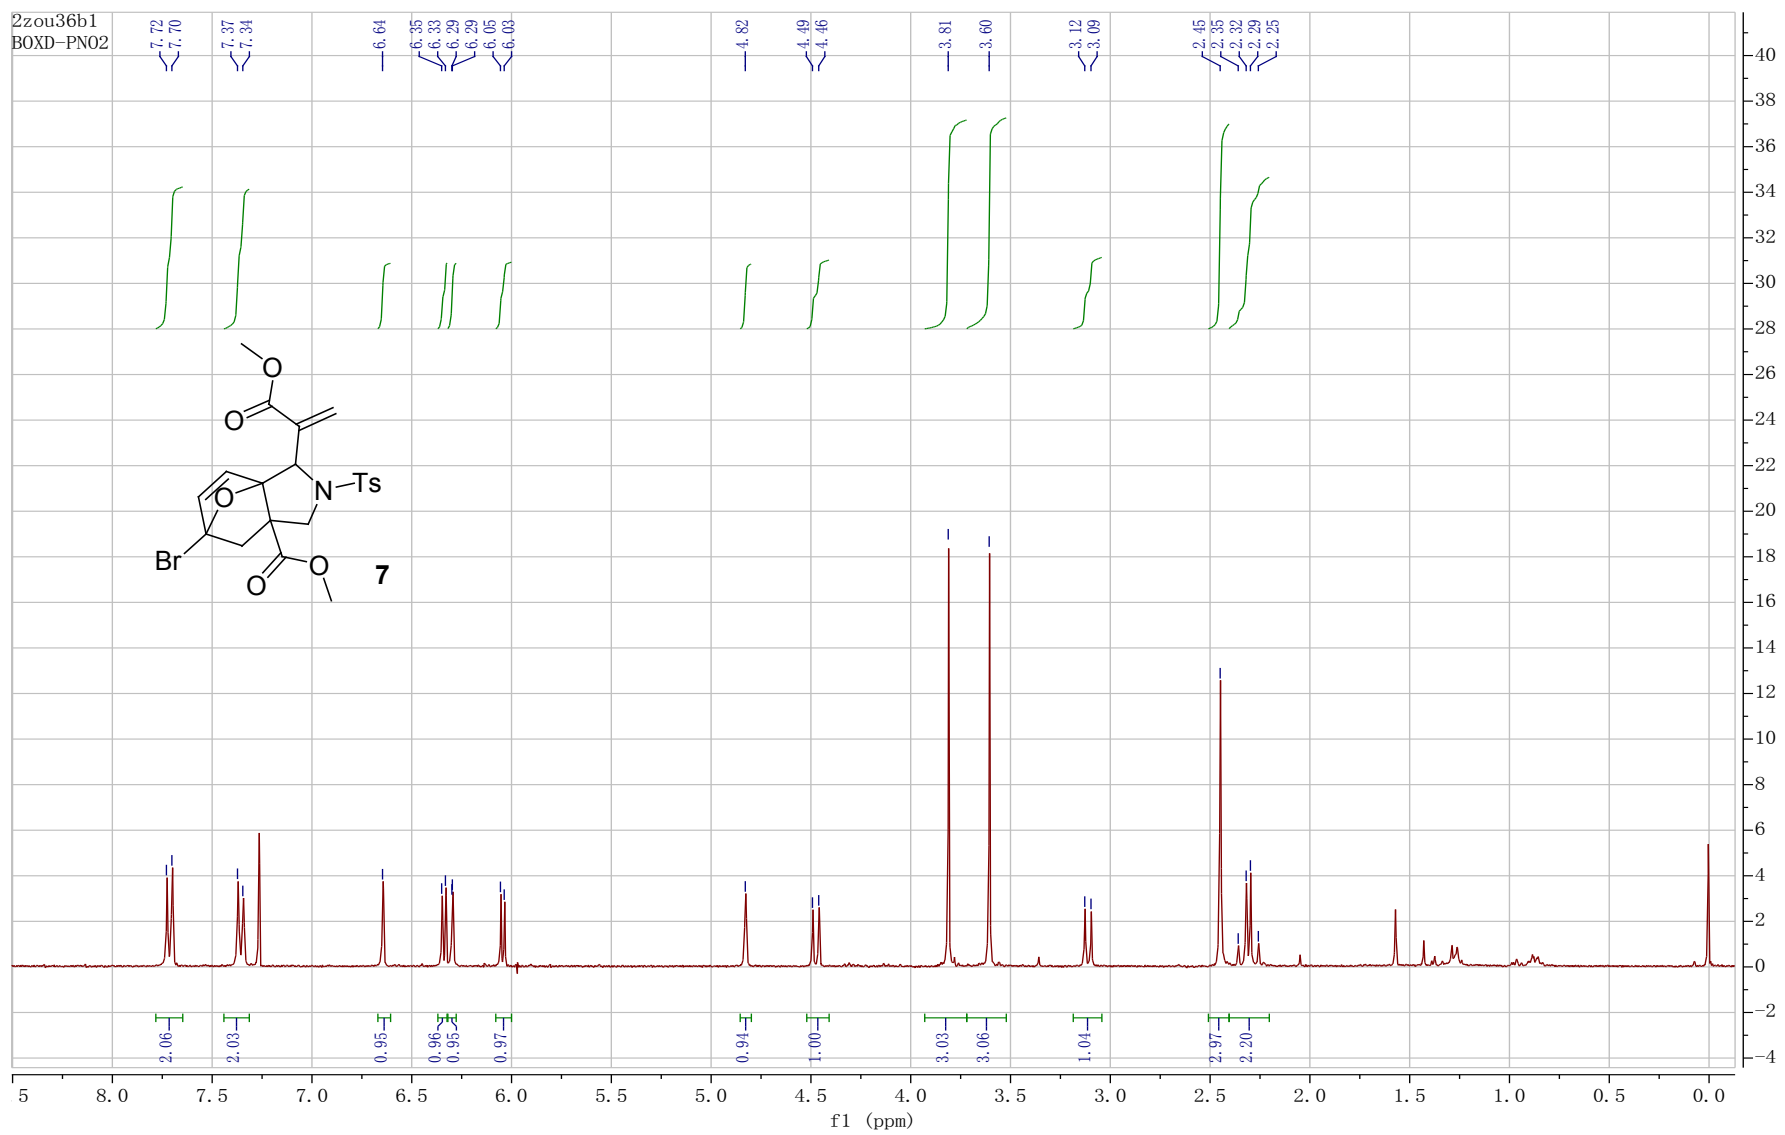

Spectra-86

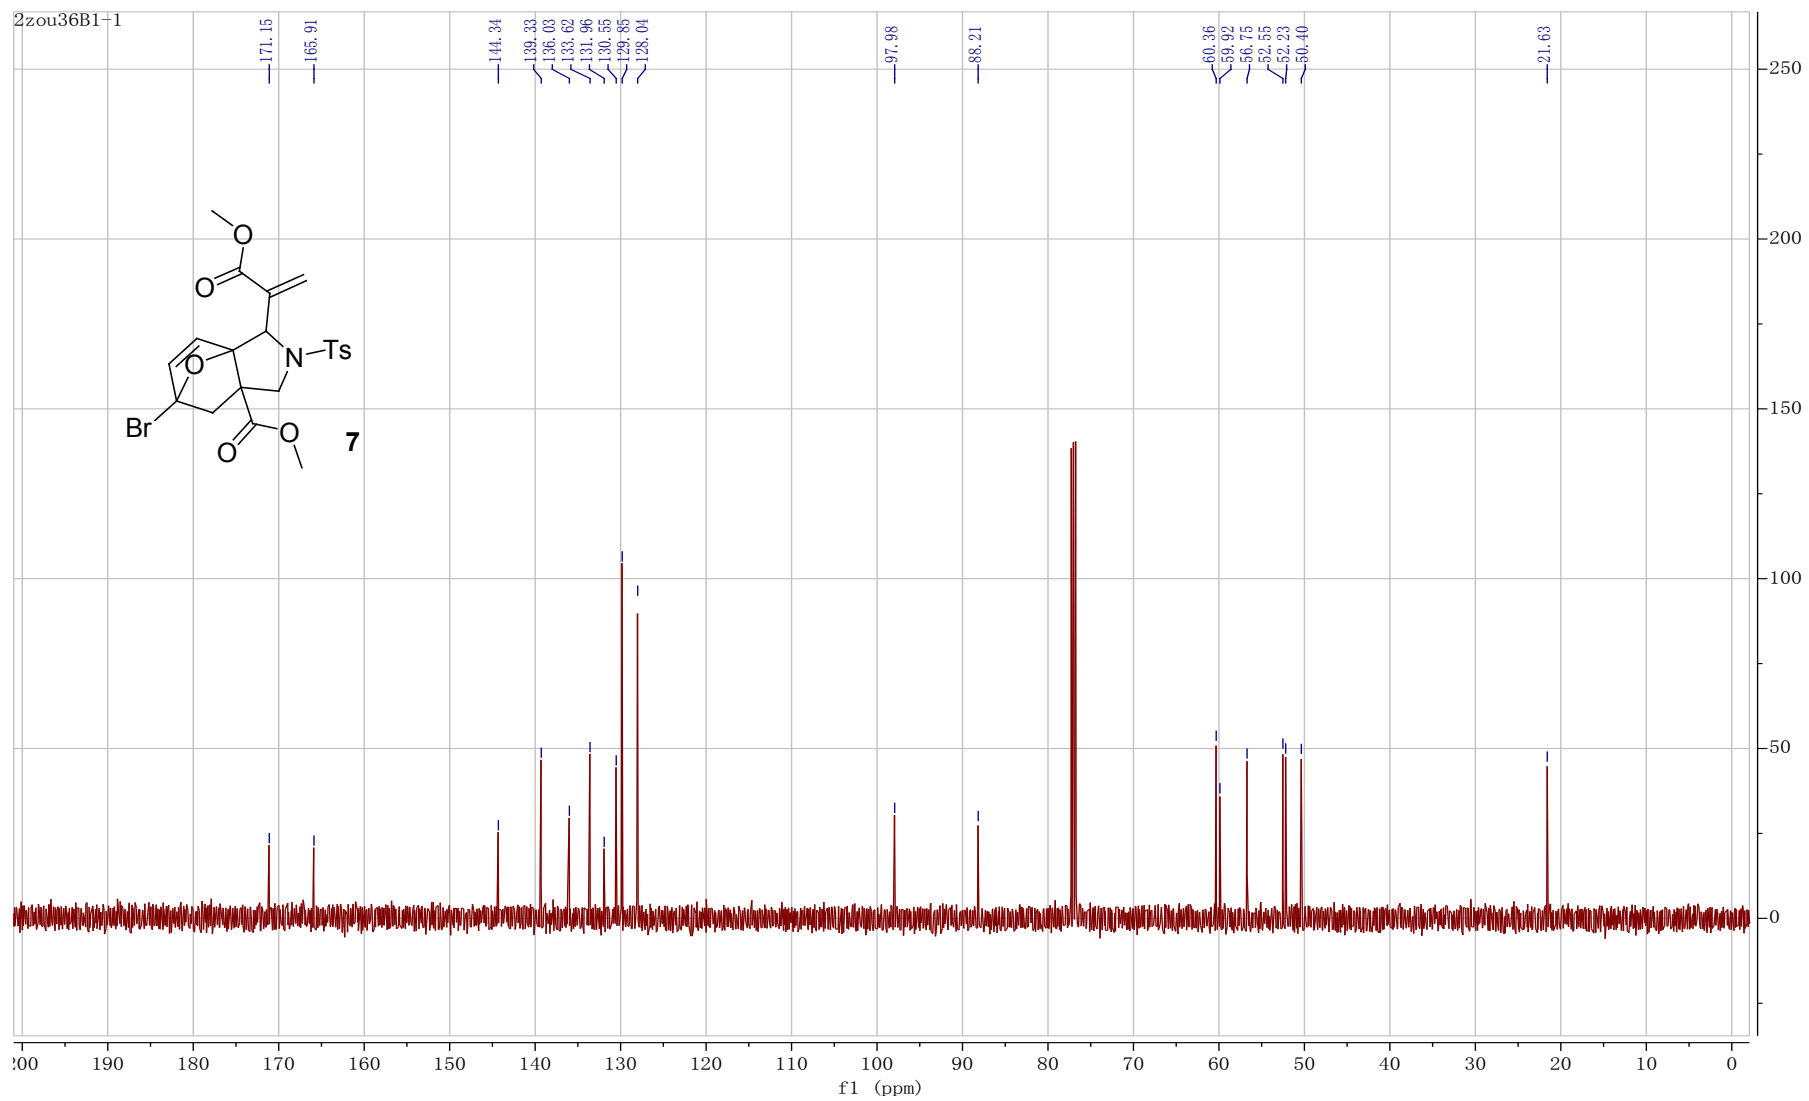

Spectra-87

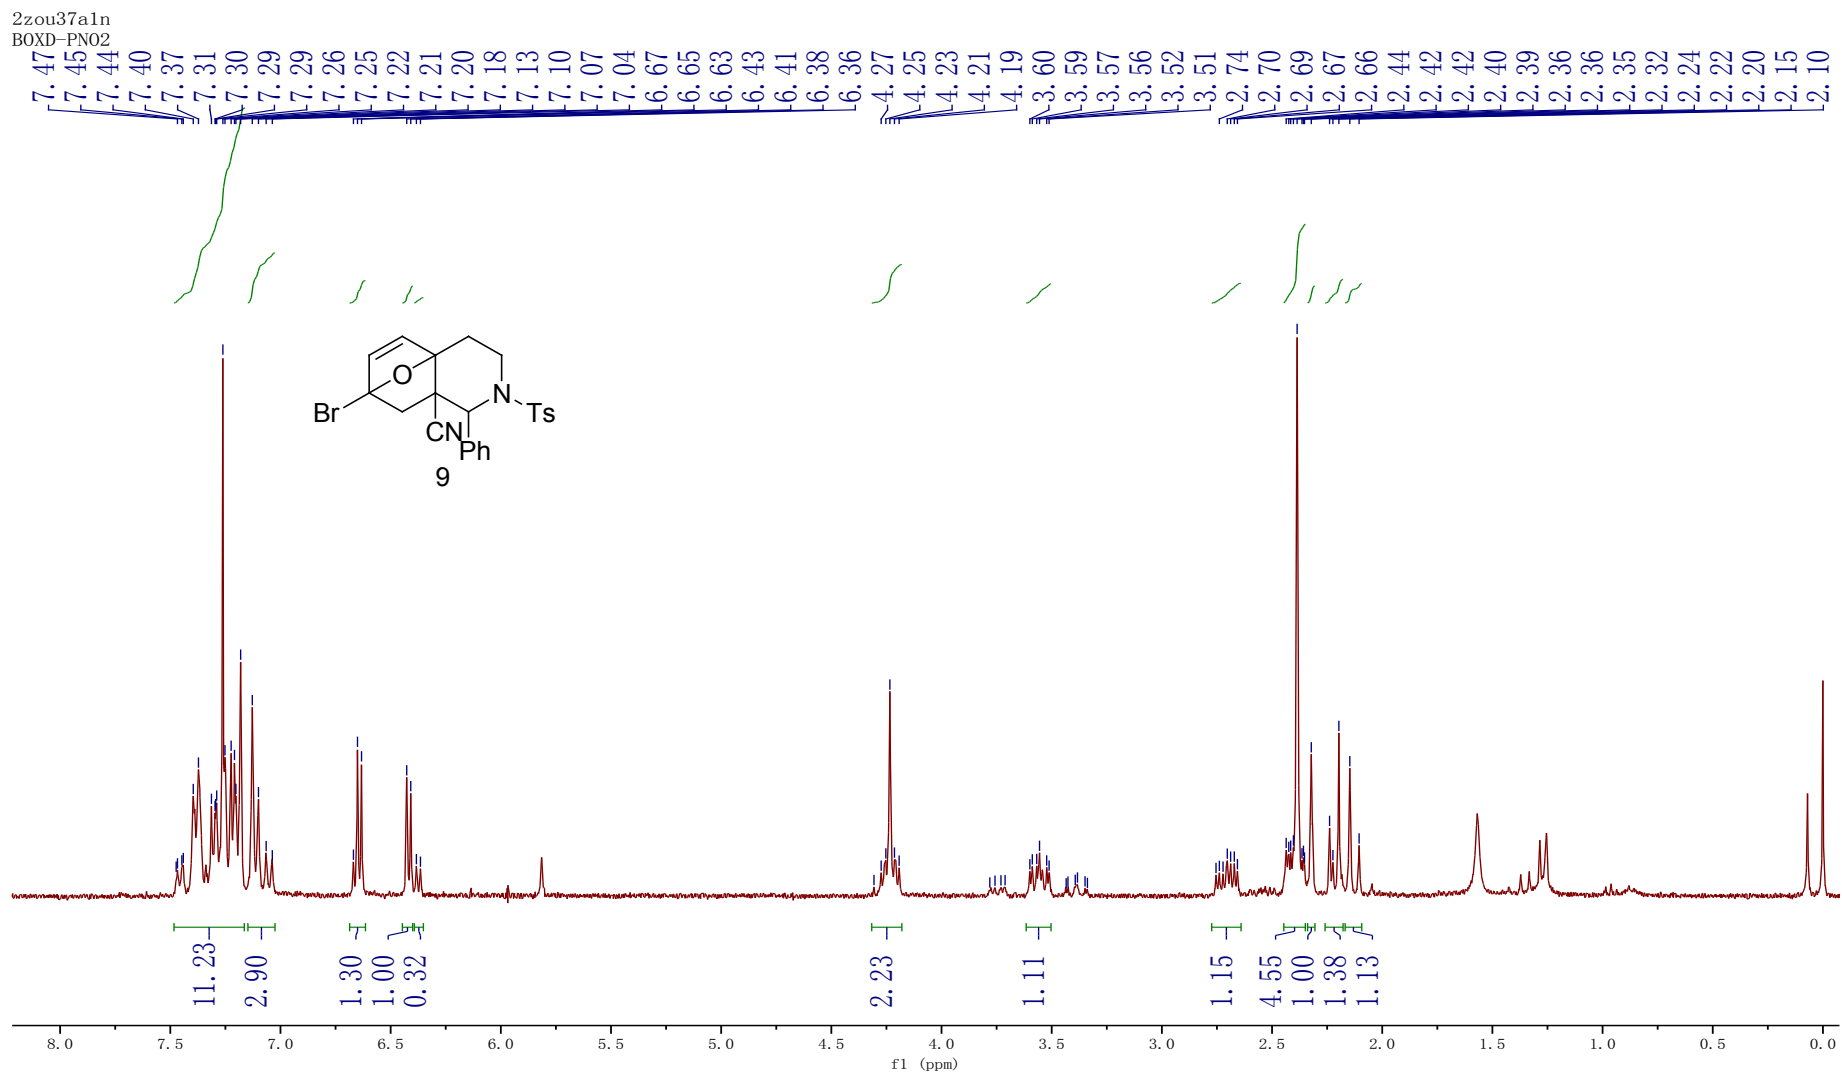

Spectra-88

桌面

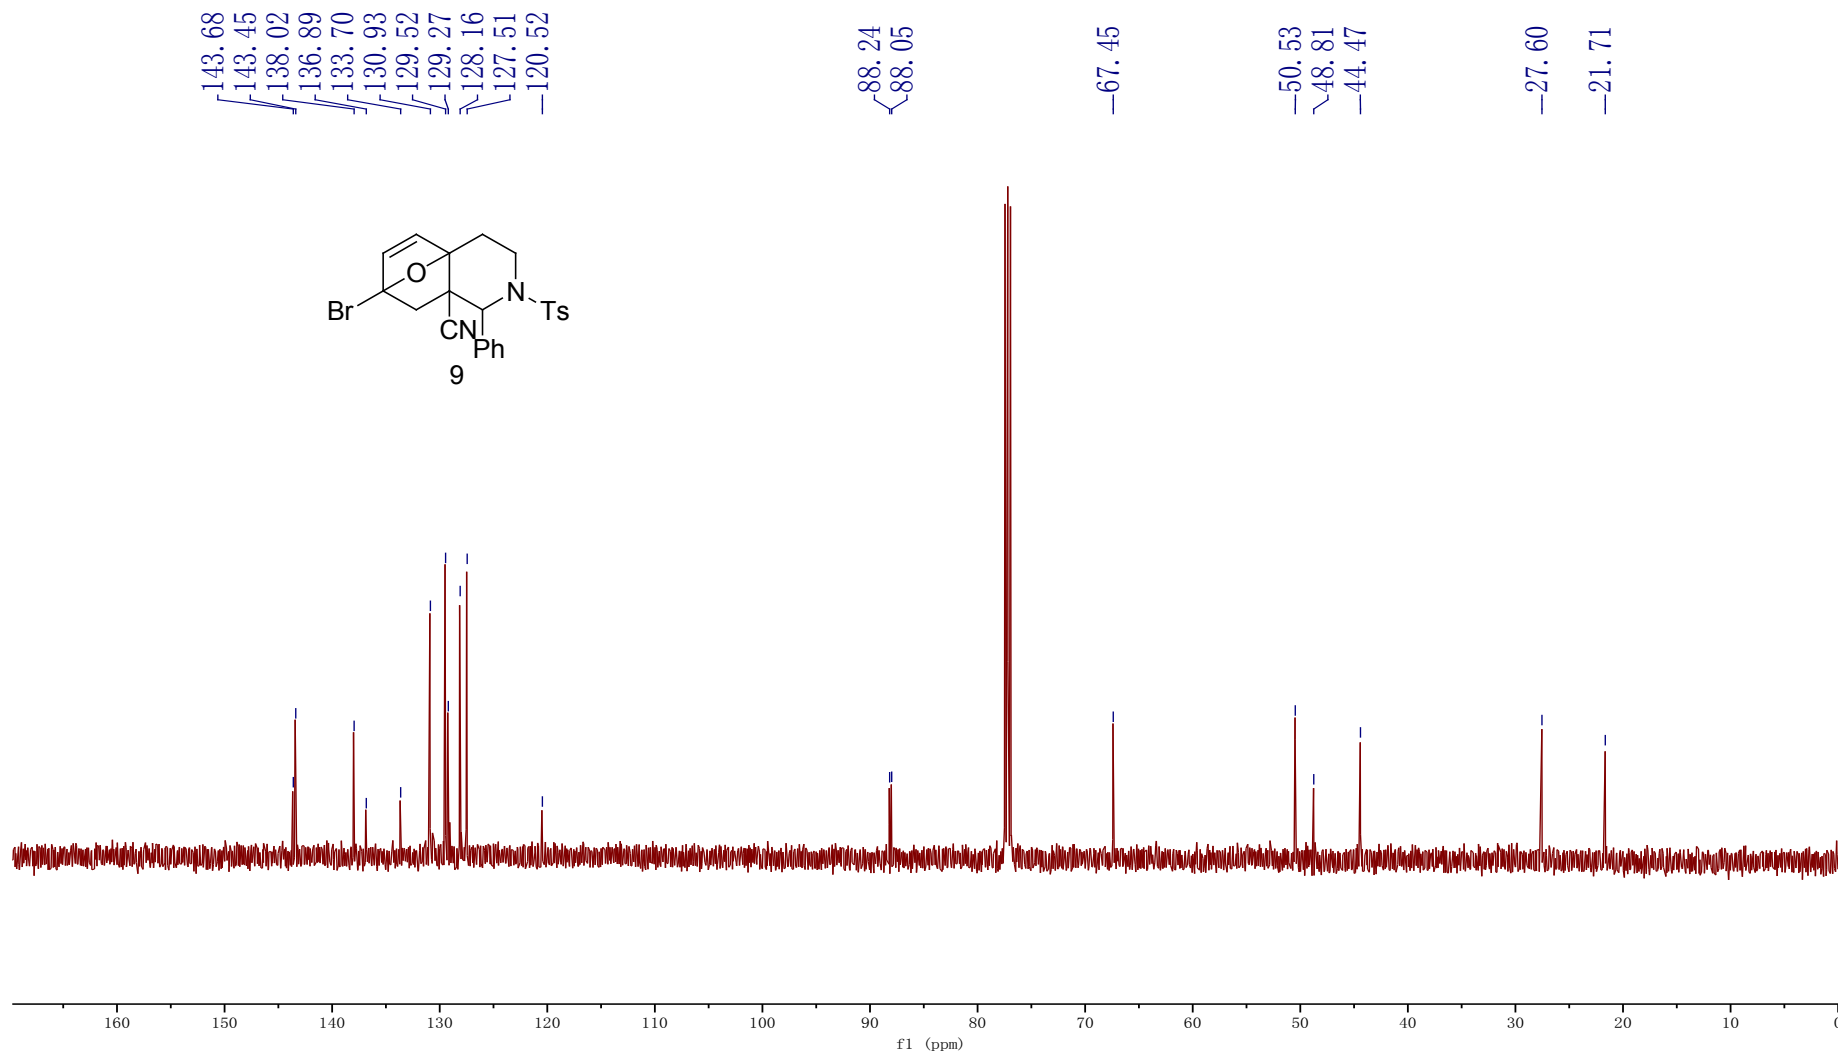

Spectra-89

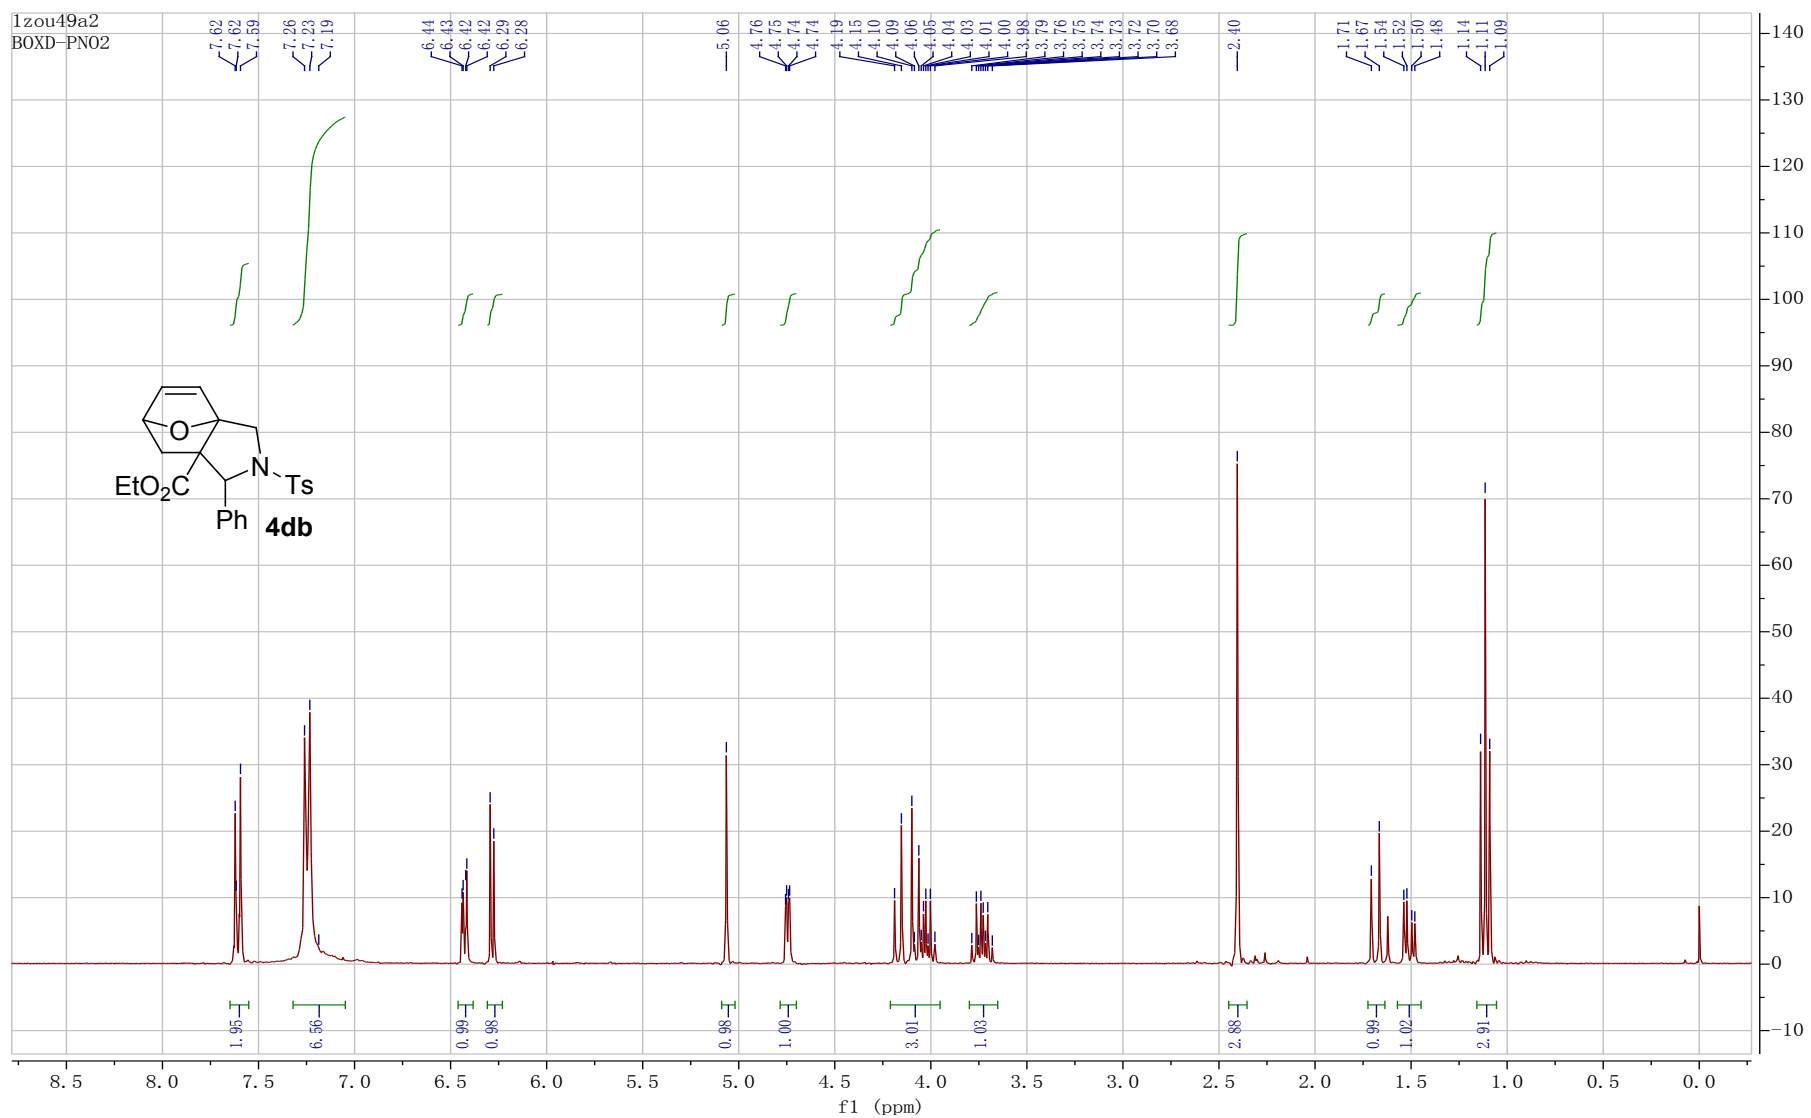

Spectra-90

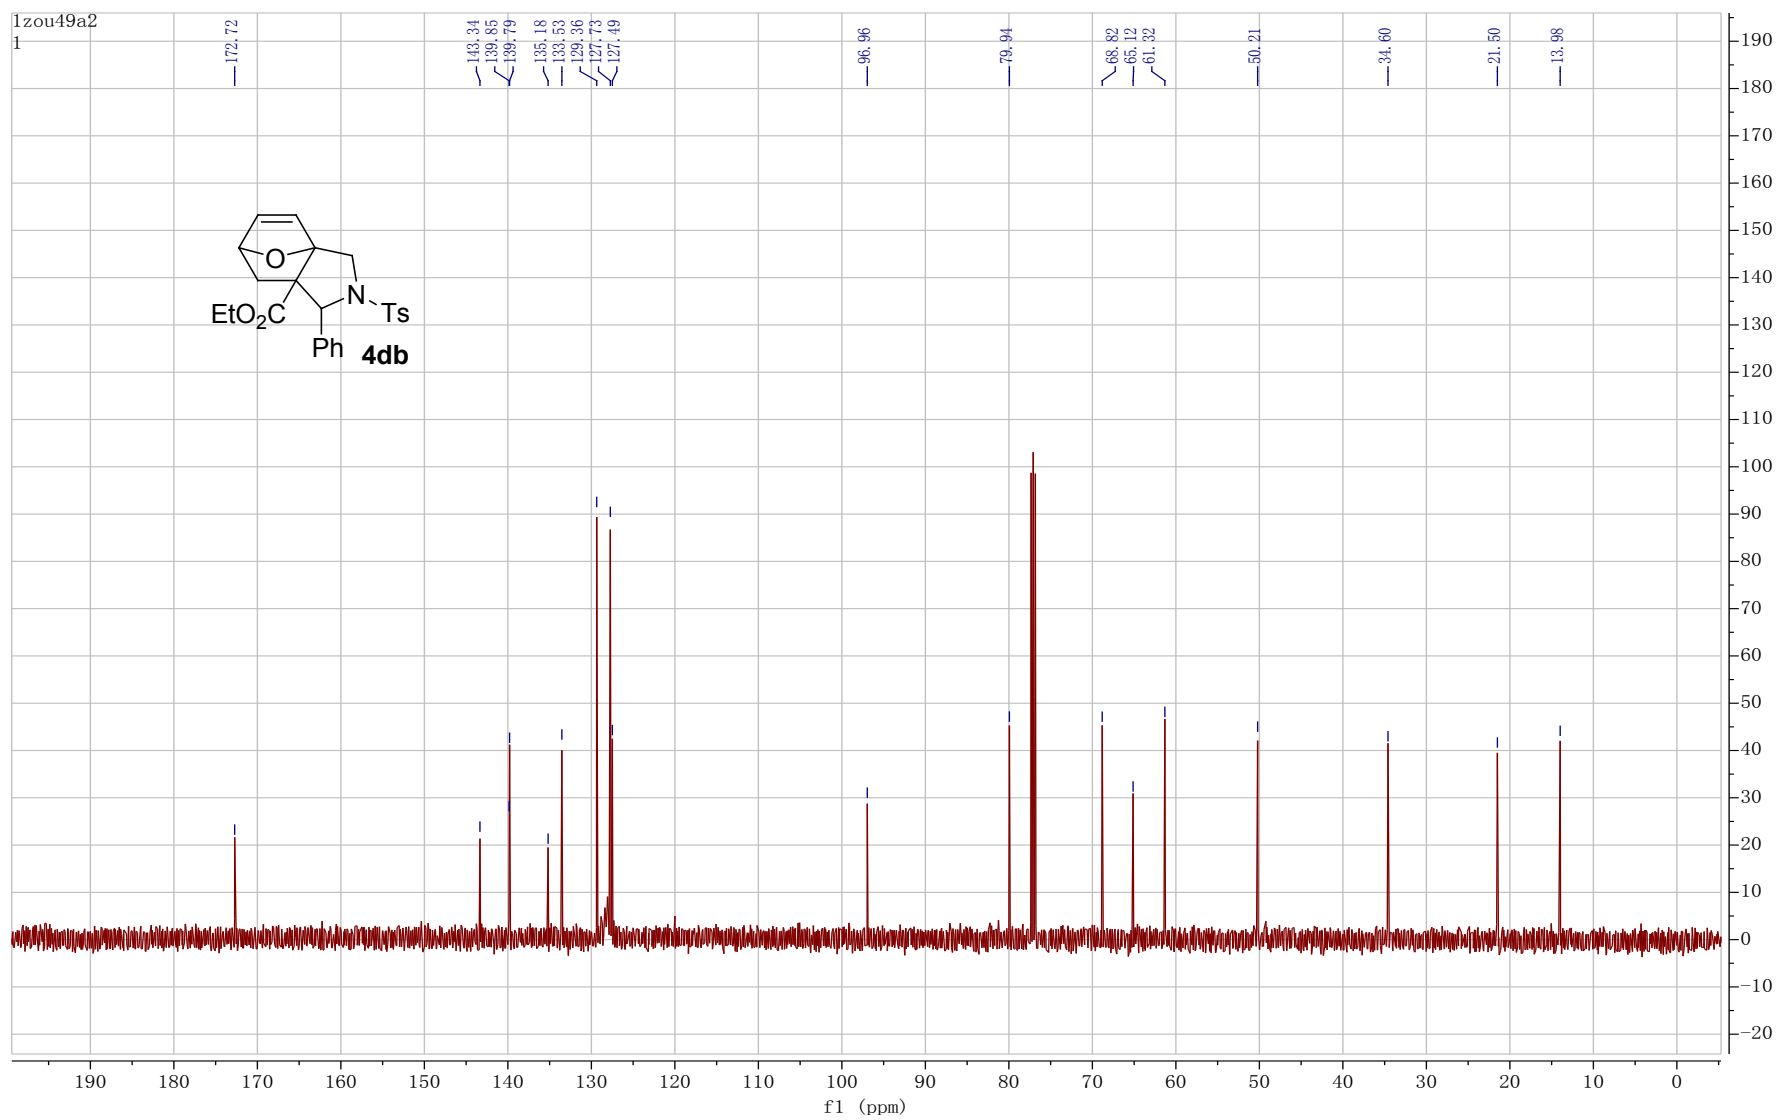

Spectra-91

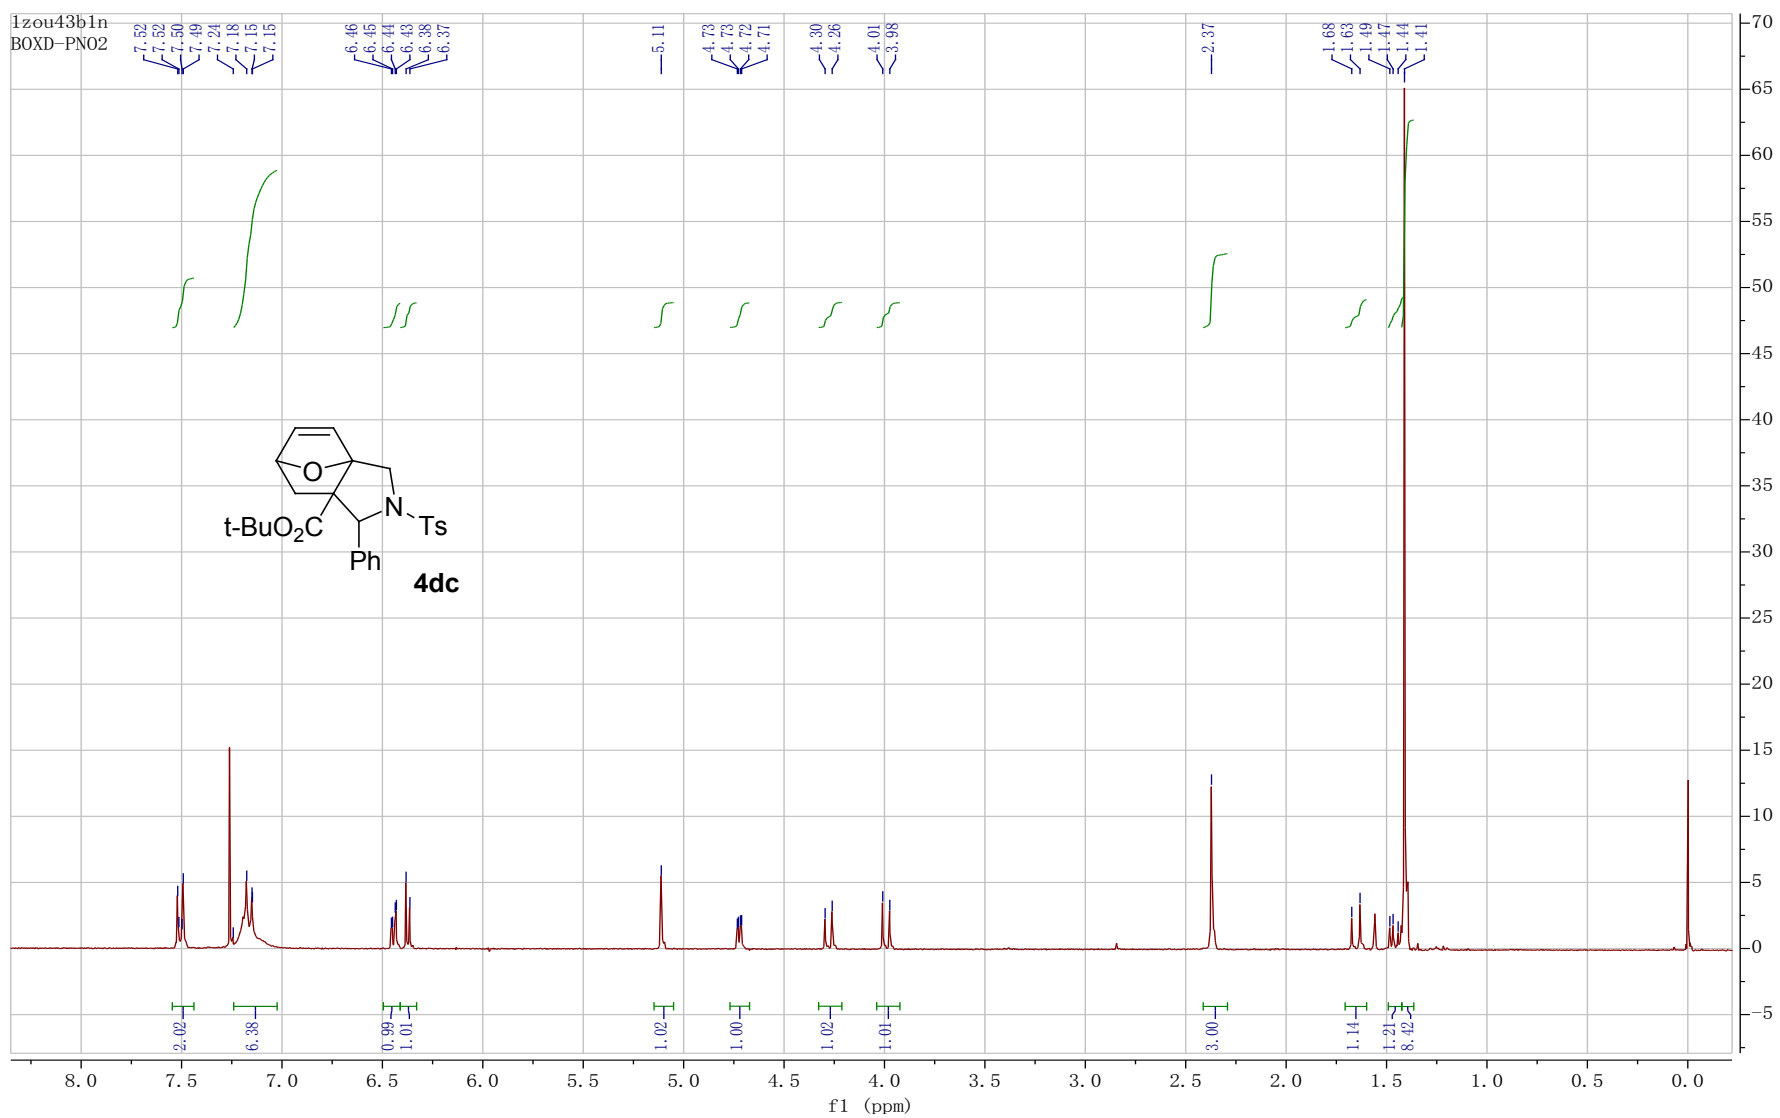

Spectra-92



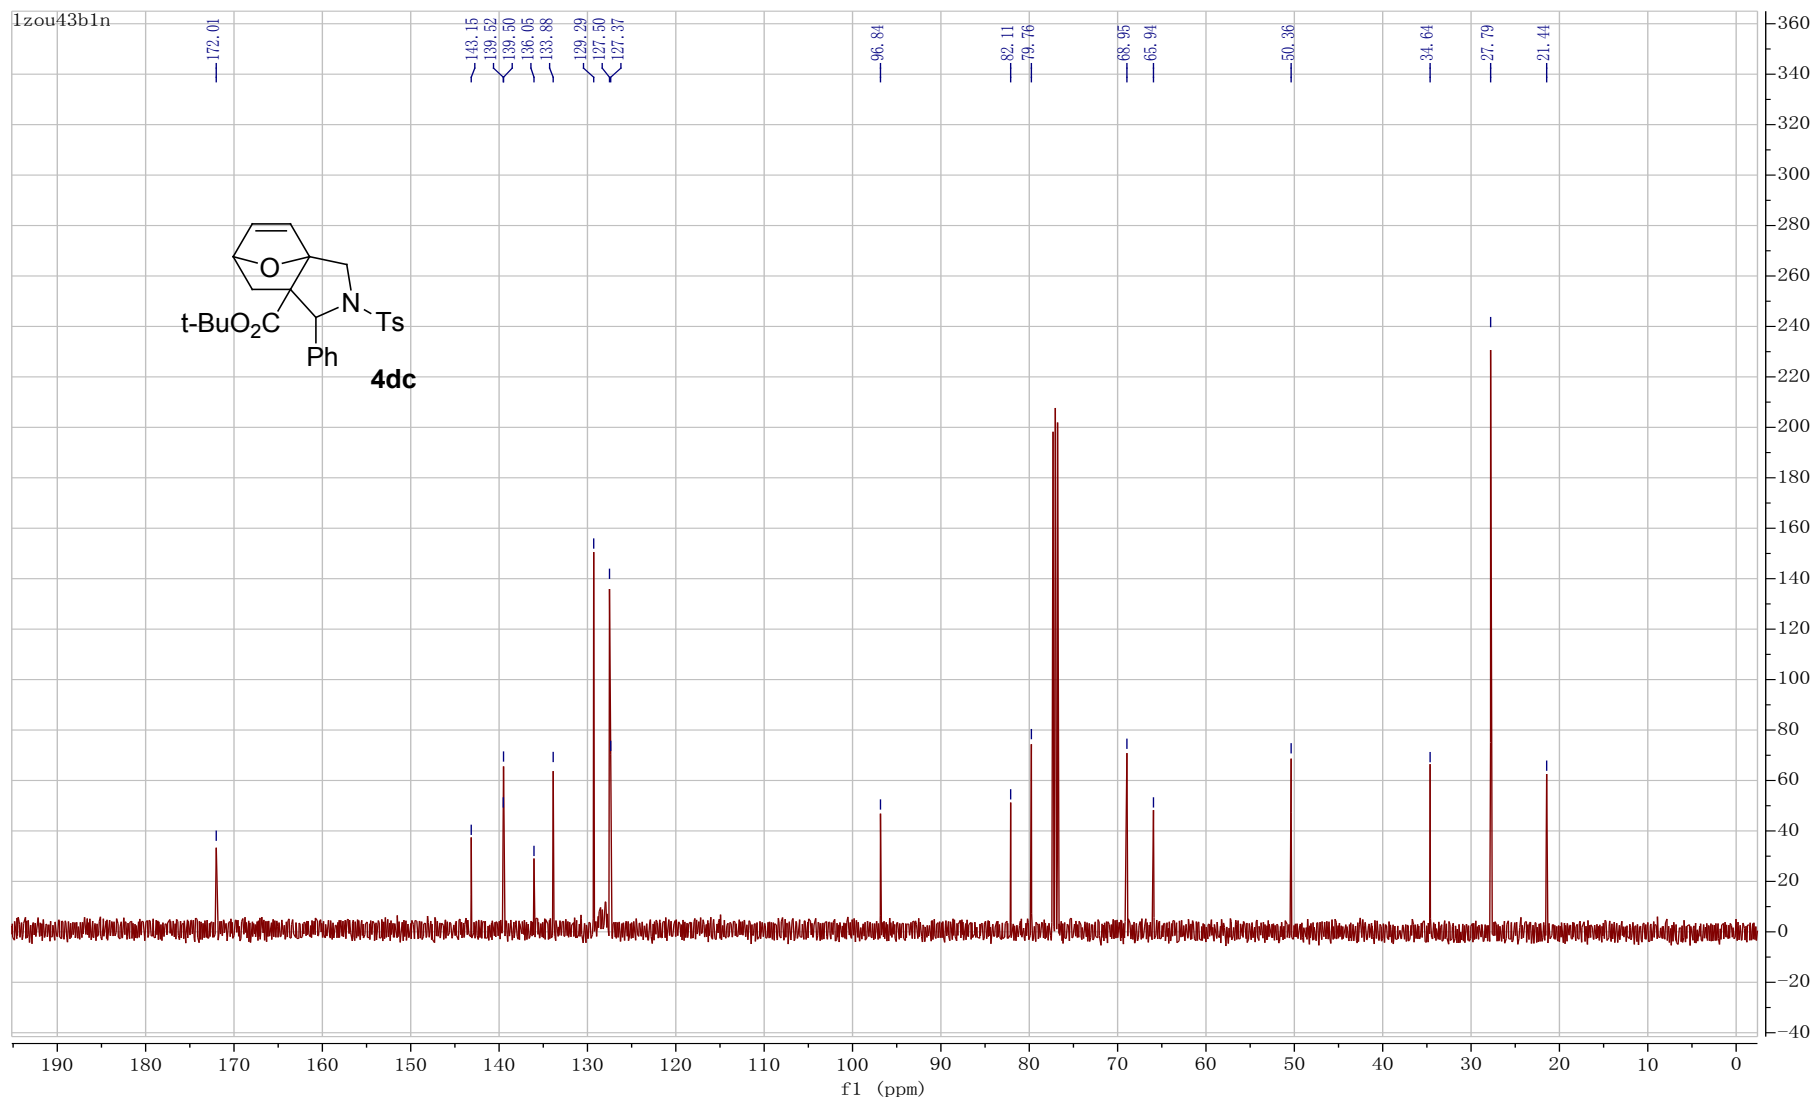

Spectra-93

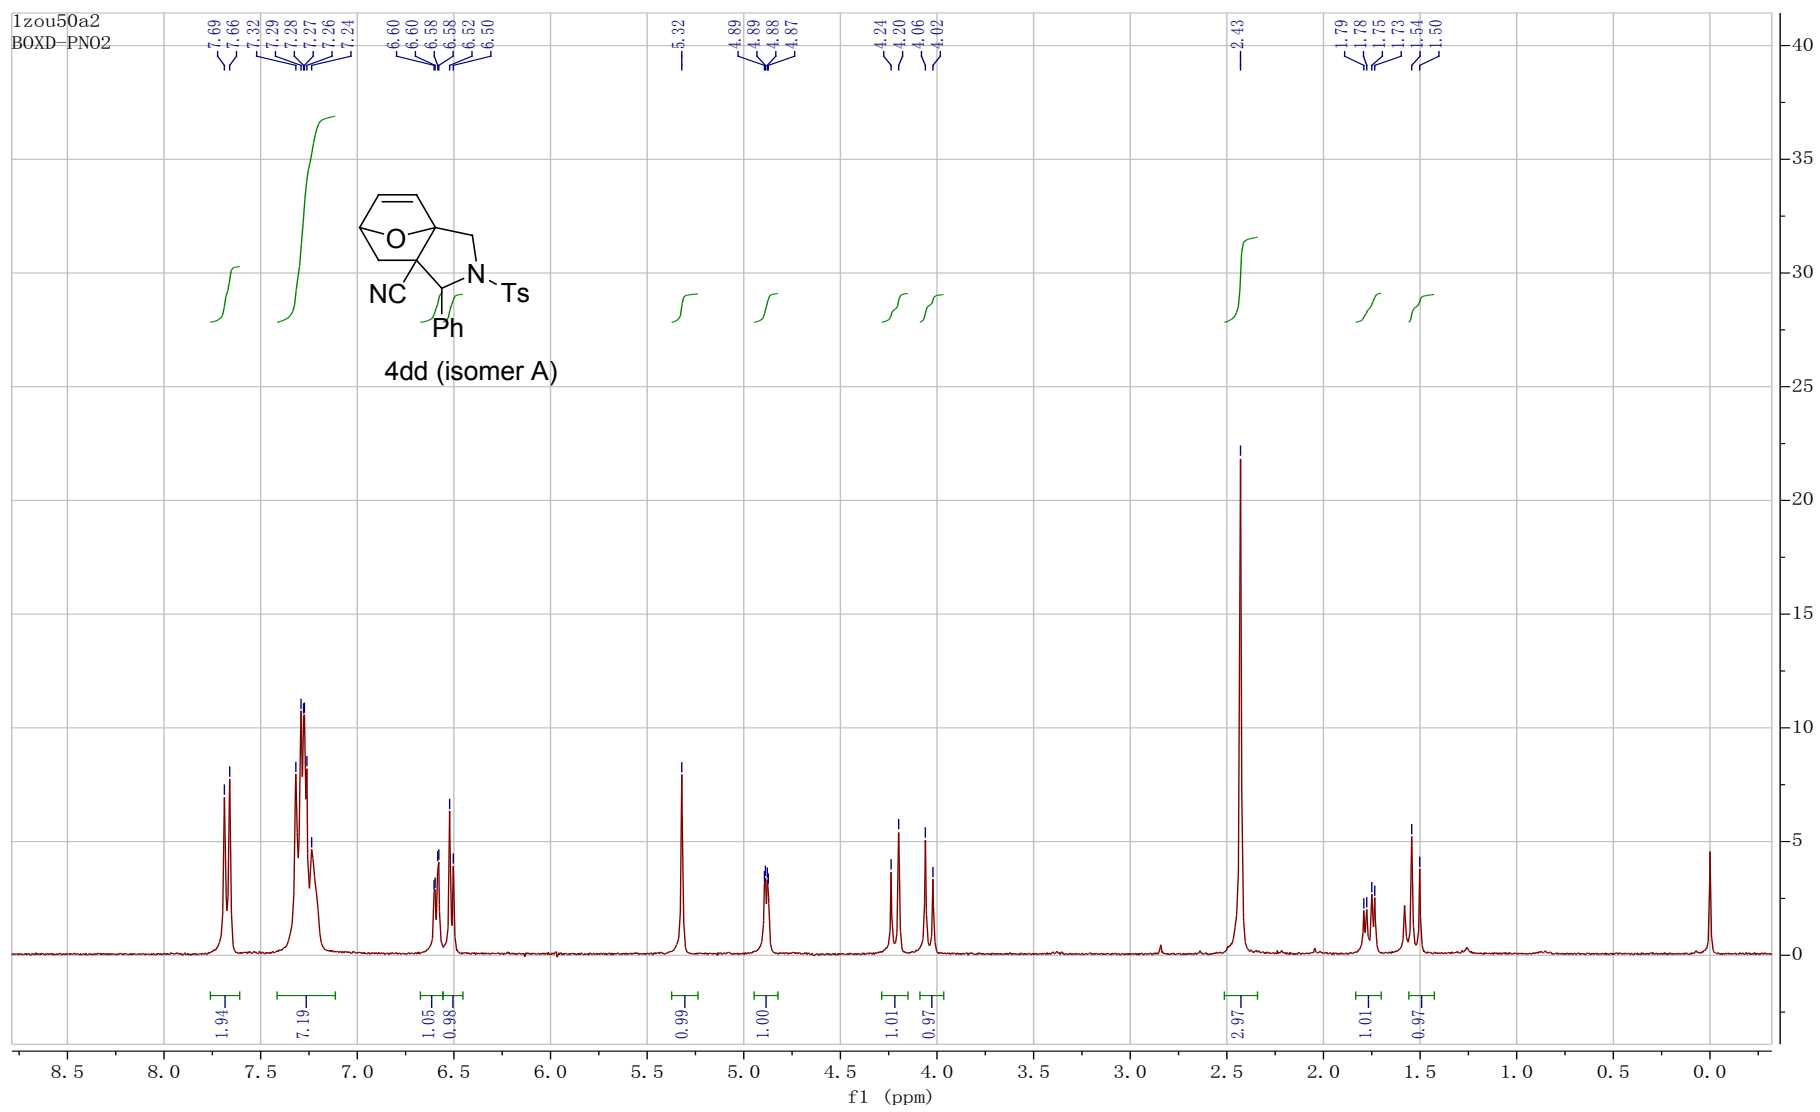

Spectra-94

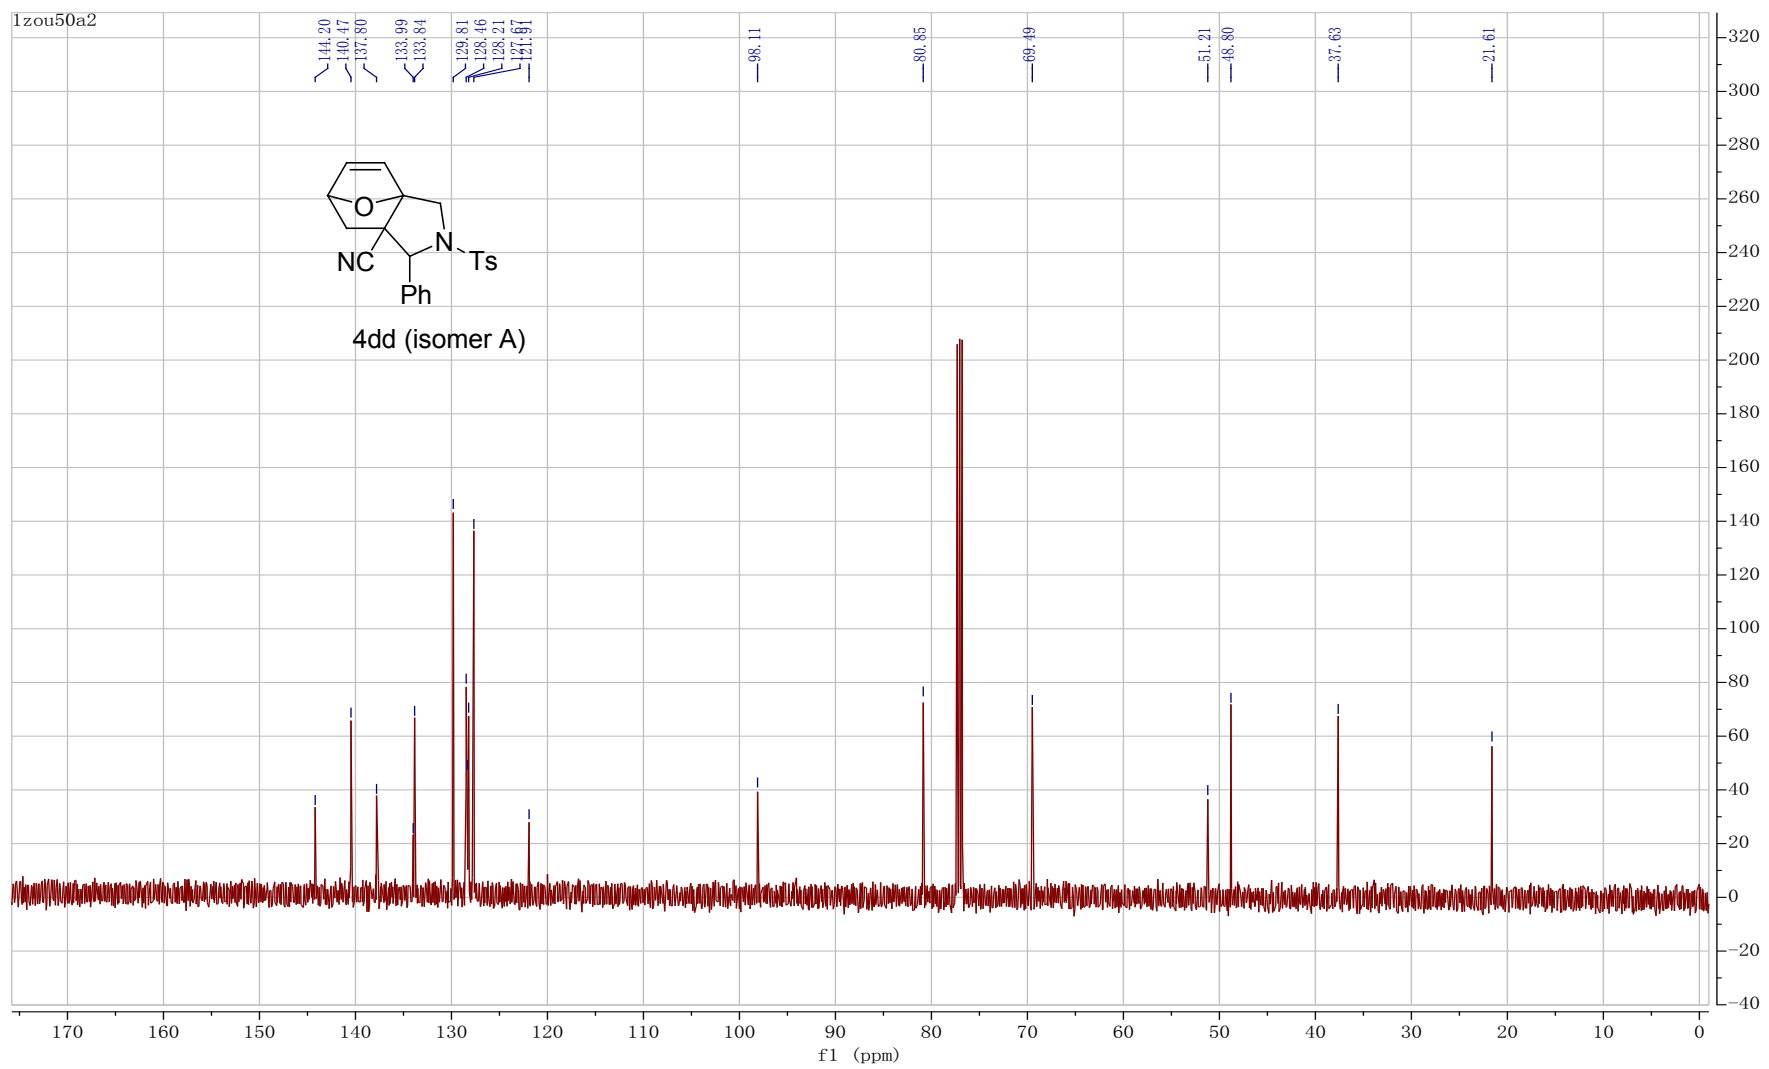

Spectra-95

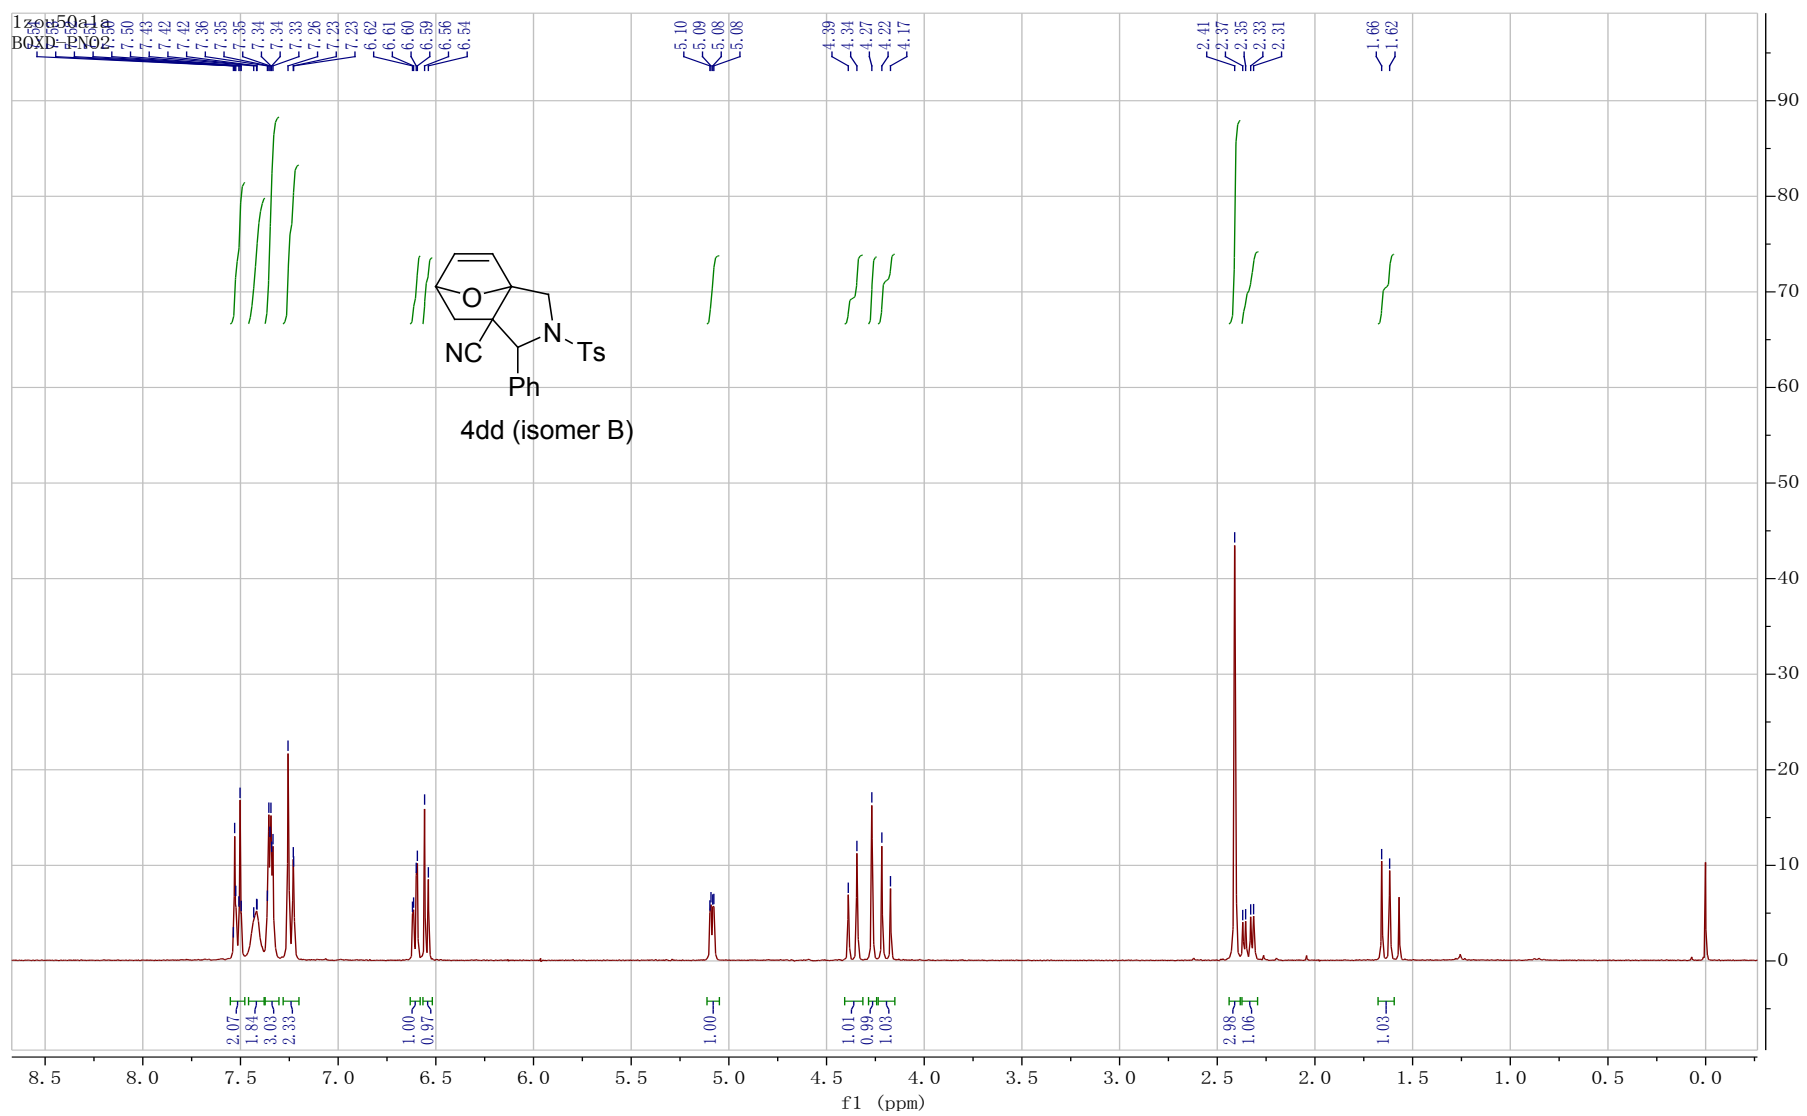

Spectra-96

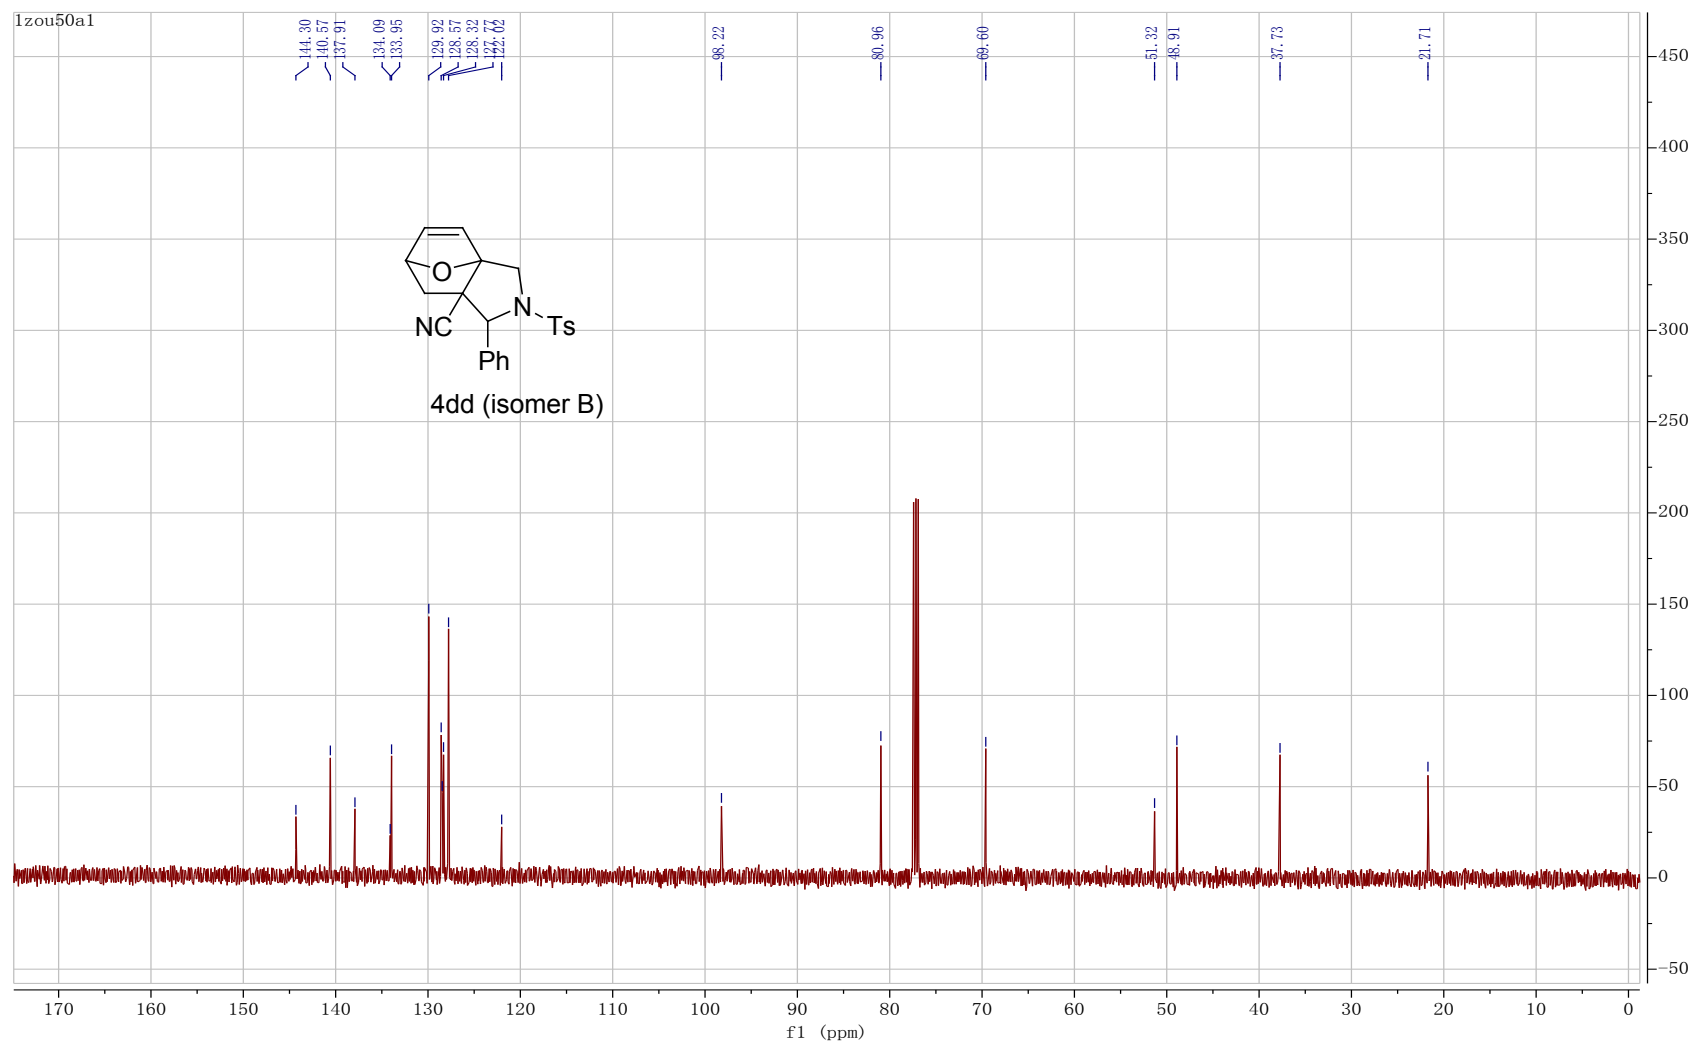

Spectra-97

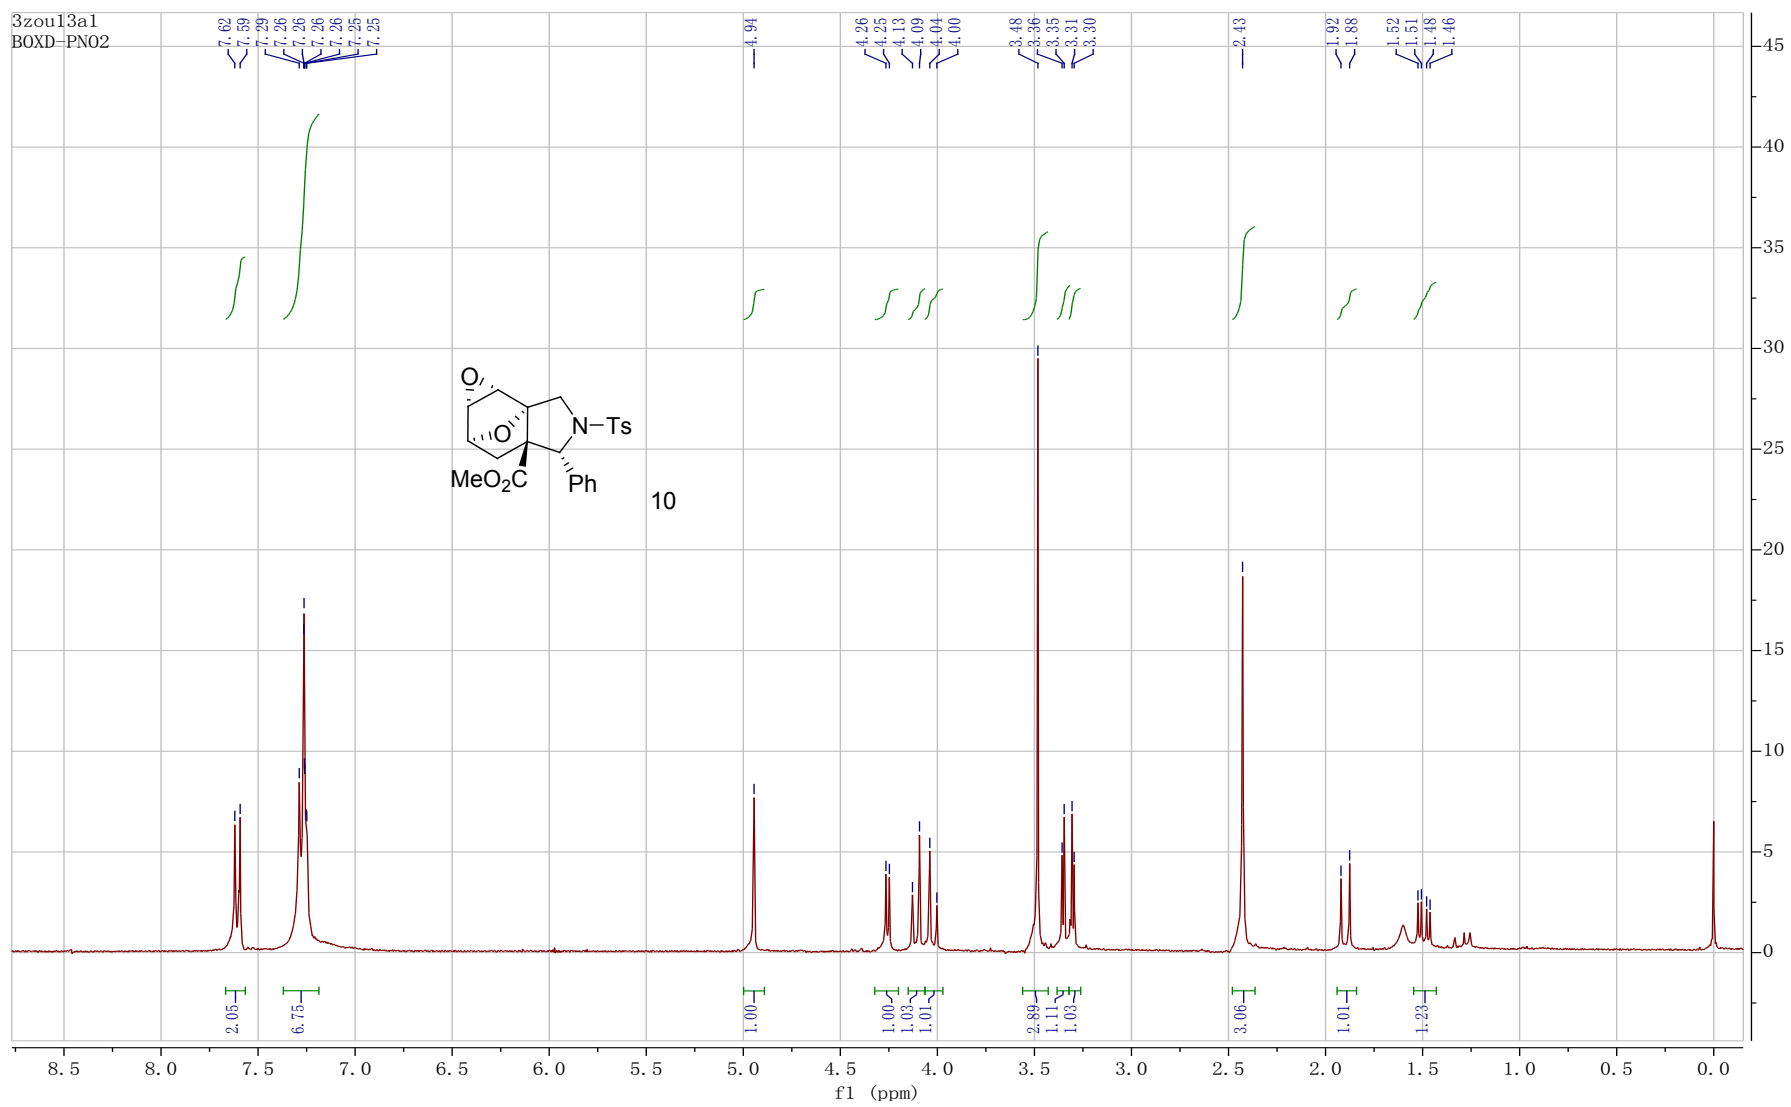

Spectra-98

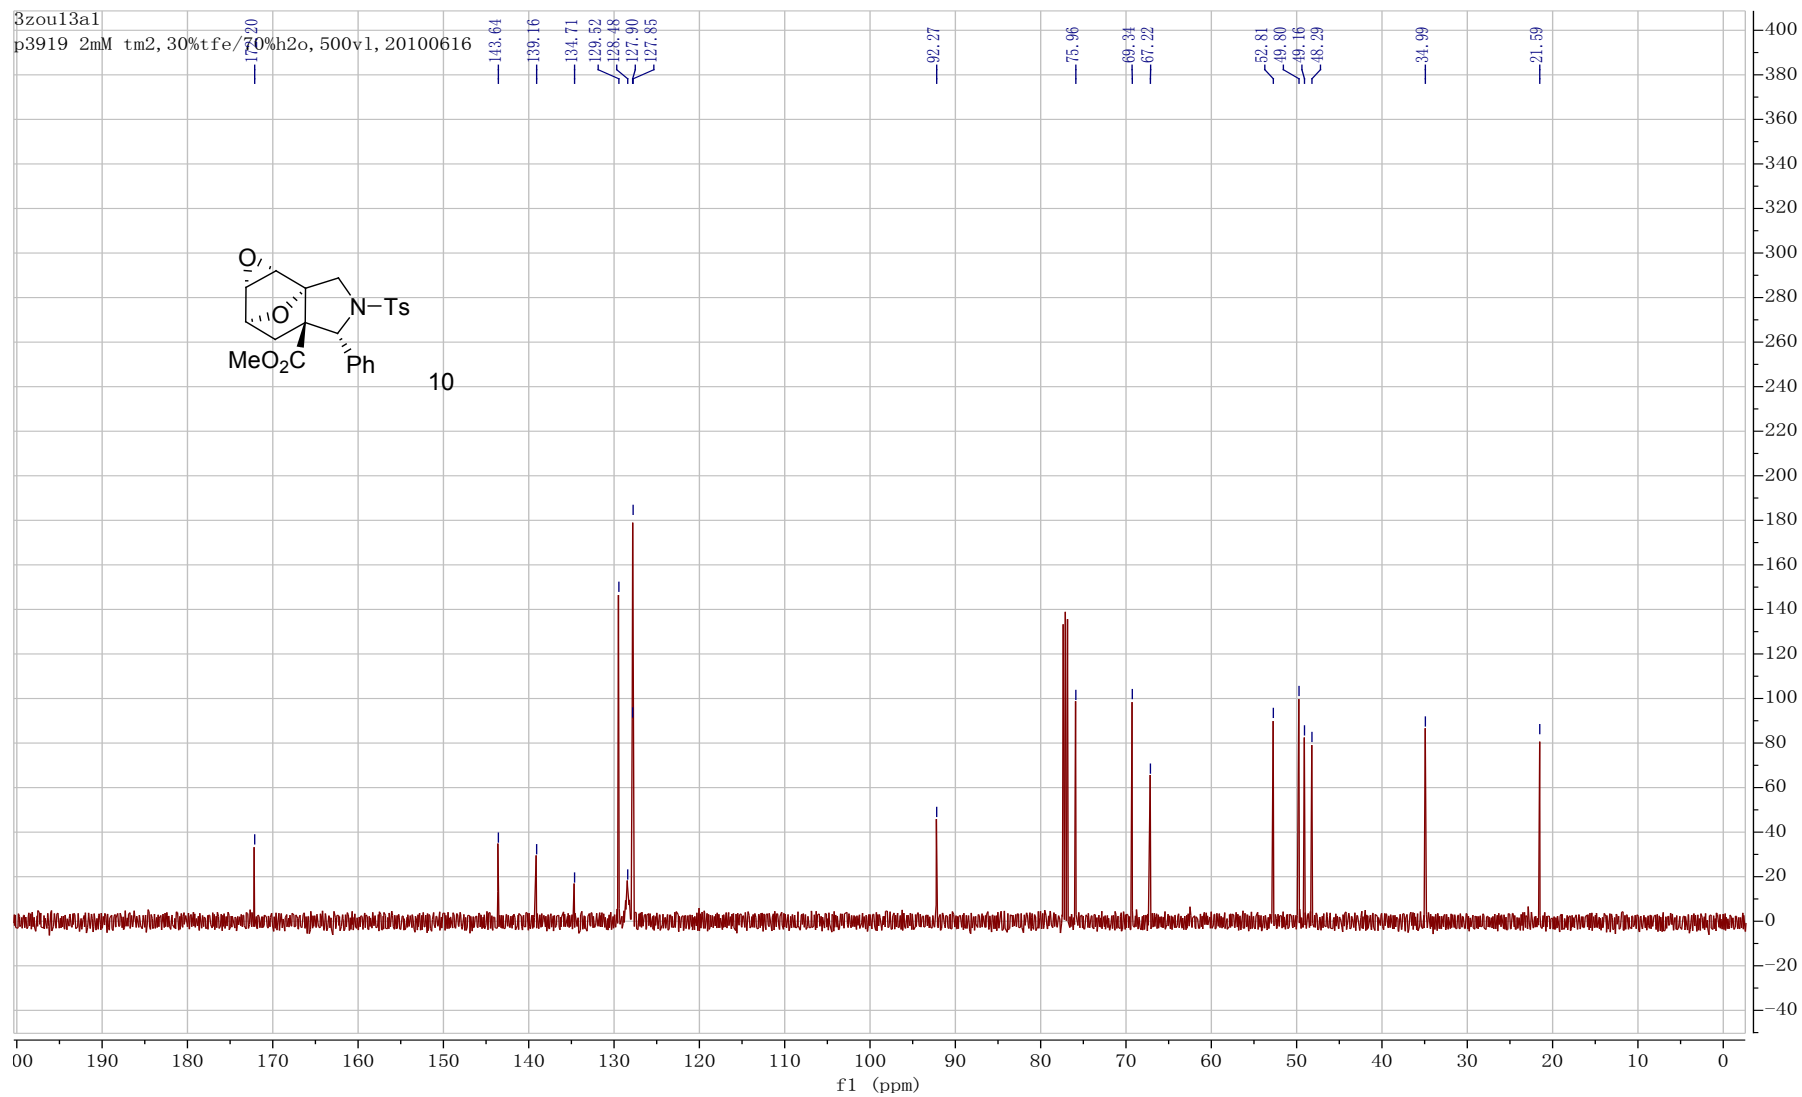

Spectra-99

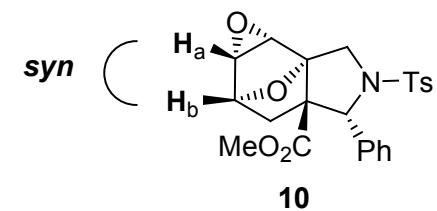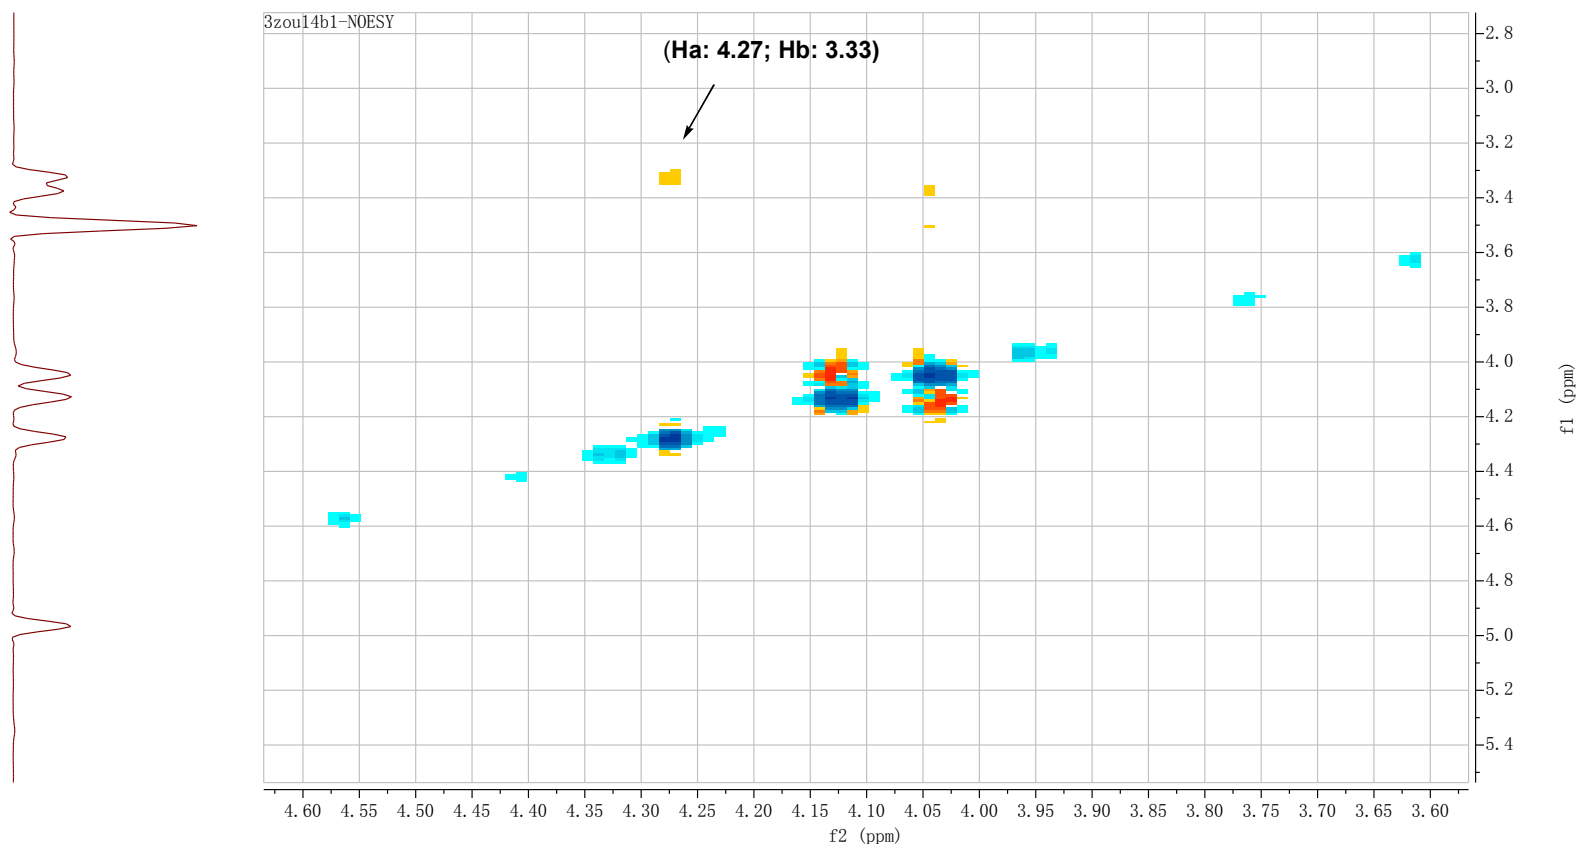

Spectra-100
